# Supplementary material for: Clonal evolution after treatment pressure in multiple myeloma: heterogenous genomic aberrations and transcriptomic convergence
Source: PubMed Central journal article supplement (PMC9252918; doi:10.1038/s41375-022-01597-y), 2022-05-28
Supplement: 41375_2022_1597_MOESM6_ESM.pdf [file 41375_2022_1597_MOESM6_ESM.pdf]

**Table S1.** Overview of analysis in samples from A) St.Olavs / Rotterdam, and B) IA13 CoMMpass cohort. PI: Proliferative index, TFD: Time from diagnosis of symptomatic MM (months).Sample type in Table A) All BM samples except \*: PB. E: Early, L: late, P1: 1st progression. PI: proliferative index, ssGSEA: single-sample GSEA.

| Patient_ID | Sample type    | TFD       | WES | RNAseq | DESeq (E-L) | DESeq (D-P1) | PI/ssGSEA | Clonality analysis |
|------------|----------------|-----------|-----|--------|-------------|--------------|-----------|--------------------|
| 3          | Progression 1  | Month 29  | x   |        |             |              |           | x                  |
|            | Progression 2  | Month 44  | x   |        |             |              |           | x                  |
| 4          | Diagnosis      |           | x   | x      | x           |              | x         | x                  |
|            | Progression 3* | Month 39  | x   | x      | x           |              | x         | x                  |
| 5          | Progression 5  | Month 83  | x   |        |             |              |           | x                  |
|            | Progression 6  | Month 99  | x   |        |             |              |           | x                  |
| 7          | Diagnosis      |           | x   |        |             |              |           | x                  |
|            | Progression 1  | Month 11  | x   |        |             |              |           | x                  |
| 8          | Progression 1  | Month 25  | x   | x      | x           |              | x         | x                  |
|            | Progression 5  | Month 34  | x   | x      | x           |              | x         | x                  |
| 9          | Diagnosis      |           | x   | x      | x           |              | x         | x                  |
|            | Progression 3  | Month 25  | x   | x      | x           |              | x         | x                  |
| 10         | Diagnosis      |           | x   | x      | x           | x            | x         | x                  |
|            | Progression 1  | Month 16  | x   | x      | x           | x            | x         | x                  |
| 13         | Diagnosis      |           | x   |        |             |              |           | x                  |
|            | Progression 5  | Month 70  | x   |        |             |              |           | x                  |
| 14         | Diagnosis      |           | x   |        |             |              |           | x                  |
|            | Progression 1  | Month 15  | x   |        |             |              |           | x                  |
|            | Progression 2  | Month 39  | x   |        |             |              |           | x                  |
| 15         | Diagnosis      |           | x   | x      | x           | x            | x         | x                  |
|            | Progression 1  | Month 48  | x   | x      | x           | x            | x         | x                  |
|            | Progression 2  | Month 61  | x   | x      | x           | x            | x         | x                  |
| 17         | Diagnosis      |           | x   |        |             |              |           | x                  |
|            | Progression 1  | Month 7   | x   |        |             |              |           | x                  |
| 18         | Diagnosis      |           | x   | x      | x           | x            | x         | x                  |
|            | Progression 1  | Month 17  | x   | x      | x           | x            | x         | x                  |
|            | Progression 2  | Month 31  | x   | x      | x           | x            | x         | x                  |
| 19         | Diagnosis      |           | x   |        |             |              |           | x                  |
|            | Progression 1  | Month 35  | x   |        |             |              |           | x                  |
| 20         | Diagnosis      |           | x   | x      | x           |              | x         | x                  |
|            | Progression 6  | Month 50  | x   | x      | x           |              | x         | x                  |
| 23         | Diagnosis      |           | x   | x      | x           | x            | x         | x                  |
|            | Progression 1  | Month 25  | x   | x      |             | x            | x         | x                  |
| 24         | Diagnosis      |           | x   | x      | x           |              | x         | x                  |
|            | Progression 2  | Month 24  | x   | x      | x           |              | x         | x                  |
| 25         | Diagnosis      |           | x   | x      | x           |              | x         | x                  |
|            | Progression 2  | Month 16  | x   | x      |             |              | x         | x                  |
|            | Progression 3  | Month 39  | x   | x      | x           |              | x         | x                  |
| 26         | Diagnosis      |           | x   | x      | x           | x            | x         | x                  |
|            | Progression 1  | Month 14  | x   | x      | x           | x            | x         | x                  |
| 27         | Diagnosis      |           | x   | x      | x           | x            | x         | x                  |
|            | Progression 1  | Month 17  | x   | x      | x           | x            | x         | x                  |
| 28         | Diagnosis      |           | x   | x      | x           | x            | x         | x                  |
|            | Progression 1  | Month 9   | x   | x      | x           | x            | x         | x                  |
| 29         | Diagnosis      |           | x   | x      | x           | x            | x         | x                  |
|            | Progression 1  | Month 5   | x   | x      | x           | x            | x         | x                  |
| 30         | Diagnosis      |           | x   | x      | x           | x            | x         | x                  |
|            | Progression 1  | Month 12  | x   | x      | x           | x            | x         | x                  |
| 31         | Diagnosis      |           | x   | x      | x           | x            | x         | x                  |
|            | Progression 1  | Month 14  | x   | x      | x           | x            | x         | x                  |
|            | Progression 2  | Month 19  | x   | x      | x           | x            | x         | x                  |
| 32         | Diagnosis      |           | x   | x      | x           | x            | x         | x                  |
|            | Progression 1  | Month 18  | x   | x      | x           | x            | x         | x                  |
| 33         | Diagnosis      |           | x   | x      | x           | x            | x         | x                  |
|            | Progression 1  | Month 18  | x   | x      | x           | x            | x         | x                  |
| 34         | Progression 2  | Month 113 | x   | x      | x           |              | x         | x                  |
|            | Progression 3  | Month 122 | x   | x      |             |              | x         | x                  |
|            | Progression 4  | Month 129 | x   | x      |             |              | x         | x                  |
|            | Progression 6  | Month 136 | x   | x      | x           |              | x         | x                  |
| 35         | Progression 1  | Month 48  | x   | x      | x           |              | x         | x                  |
|            | Progression 2  | Month 72  | x   | x      | x           |              | x         | x                  |
| 36         | Progression 2  | Month 138 | x   | x      | x           |              | x         | x                  |
|            | Progression 5  | Month 174 | x   | x      | x           |              | x         | x                  |
| 39         | Diagnosis      |           | x   |        |             |              |           | x                  |
|            | Progression 1  | Month 15  | x   |        |             |              |           | x                  |

| Patient_ID | MMRF_ID   | Sample         | Sample type | TFD      | WES | RNAseq | DESeq (E-L) | DESeq (D-P1) | PI/ssGSEA | Clonality analysis |
|------------|-----------|----------------|-------------|----------|-----|--------|-------------|--------------|-----------|--------------------|
| 40         | MMRF_1157 | MMRF_1157_1_BM | Diagnosis   |          | x   | x      |             | x            | x         | x                  |
|            |           | MMRF_1157_2_BM | Progression | Month 21 | x   | x      |             | x            | x         | x                  |
|            |           | MMRF_1157_4_BM | Progression | Month 33 | x   | x      |             | x            | x         | x                  |
|            |           | MMRF_1157_5_BM | Progression | Month 54 | x   | x      | x           |              | x         | x                  |
| 41         | MMRF_1179 | MMRF_1179_1_BM | Diagnosis   |          | x   | x      | x           |              | x         | x                  |
|            |           | MMRF_1179_2_BM | Progression | Year 3   | x   | x      | x           |              | x         | x                  |
| 42         | MMRF_1285 | MMRF_1285_1_BM | Diagnosis   |          | x   | x      | x           | x            | x         | x                  |
|            |           | MMRF_1285_3_BM | Progression | Month 30 | x   | x      | x           | x            | x         | x                  |
| 43         | MMRF_1433 | MMRF_1433_1_BM | Diagnosis   |          | x   | x      | x           | x            | x         | x                  |
|            |           | MMRF_1433_2_BM | Progression | Month 30 | x   | x      |             | x            | x         | x                  |
|            |           | MMRF_1433_5_BM | Progression | Month 51 | x   | x      | x           |              | x         | x                  |
| 44         | MMRF_1534 | MMRF_1534_1_BM | Diagnosis   |          | x   | x      | x           |              | x         | x                  |
|            |           | MMRF_1534_5_BM | Progression | Month 45 | x   | x      | x           |              | x         | x                  |
| 45         | MMRF_1565 | MMRF_1565_1_BM | Diagnosis   |          | x   | x      | x           | x            | x         | x                  |
|            |           | MMRF_1565_3_BM | Progression | Year 3   | x   | x      | x           | x            | x         | x                  |
| 46         | MMRF_1587 | MMRF_1587_1_BM | Diagnosis   |          | x   | x      | x           |              | x         | x                  |
|            |           | MMRF_1587_2_BM | Progression | Month 18 | x   | x      | x           |              | x         | x                  |
| 47         | MMRF_1627 | MMRF_1627_1_BM | Diagnosis   |          | x   | x      | x           | x            | x         | x                  |
|            |           | MMRF_1627_3_BM | Progression | Month 21 | x   | x      | x           | x            | x         | x                  |
| 48         | MMRF_1639 | MMRF_1639_1_BM | Diagnosis   |          | x   | x      | x           | x            | x         | x                  |
|            |           | MMRF_1639_3_BM | Progression | Month 18 | x   | x      | x           | x            | x         | x                  |
| 49         | MMRF_1656 | MMRF_1656_1_BM | Diagnosis   |          | x   | x      | x           |              | x         | x                  |
|            |           | MMRF_1656_4_BM | Progression | Month 18 | x   | x      | x           |              | x         | x                  |
| 50         | MMRF_1671 | MMRF_1671_1_BM | Diagnosis   |          | x   | x      | x           |              | x         | x                  |
|            |           | MMRF_1671_5_BM | Progression | Year 3   | x   | x      | x           |              | x         | x                  |
| 51         | MMRF_1700 | MMRF_1700_1_BM | Diagnosis   |          | x   | x      | x           |              | x         | x                  |
|            |           | MMRF_1700_2_BM | Progression | Month 18 | x   | x      | x           |              | x         | x                  |
| 52         | MMRF_1739 | MMRF_1739_1_BM | Diagnosis   |          | x   | x      | x           |              | x         | x                  |
|            |           | MMRF_1739_2_BM | Progression | Month 39 | x   | x      | x           |              | x         | x                  |
| 53         | MMRF_1795 | MMRF_1795_1_BM | Diagnosis   |          | x   | x      | x           | x            | x         | x                  |
|            |           | MMRF_1795_2_BM | Progression | Month 42 | x   | x      | x           | x            | x         | x                  |
| 54         | MMRF_1908 | MMRF_1908_1_BM | Diagnosis   |          | x   | x      | x           | x            | x         | x                  |
|            |           | MMRF_1908_3_BM | Progression | Month 33 | x   | x      | x           | x            | x         | x                  |
| 55         | MMRF_1931 | MMRF_1931_1_BM | Diagnosis   |          | x   | x      | x           | x            | x         | x                  |
|            |           | MMRF_1931_2_BM | Progression | Month 18 | x   | x      | x           | x            | x         | x                  |
| 56         | MMRF_1992 | MMRF_1992_1_BM | Diagnosis   |          | x   | x      | x           | x            | x         | x                  |
|            |           | MMRF_1992_2_BM | Progression | Month 15 | x   | x      | x           | x            | x         | x                  |
| 57         | MMRF_2059 | MMRF_2059_1_BM | Diagnosis   |          | x   | x      | x           | x            | x         | x                  |
|            |           | MMRF_2059_2_BM | Progression | Month 27 | x   | x      | x           | x            | x         | x                  |
| 58         | MMRF_2089 | MMRF_2089_1_BM | Diagnosis   |          | x   | x      | x           | x            | x         | x                  |
|            |           | MMRF_2089_2_BM | Progression | Month 9  | x   | x      | x           | x            | x         | x                  |
| 59         | MMRF_2122 | MMRF_2122_1_BM | Diagnosis   |          | x   | x      | x           |              | x         | x                  |
|            |           | MMRF_2122_3_BM | Progression | Month 18 | x   | x      | x           |              | x         | x                  |
| 60         | MMRF_2126 | MMRF_2126_1_BM | Diagnosis   |          | x   | x      | x           |              | x         | x                  |
|            |           | MMRF_2126_2_BM | Progression | Month 21 | x   | x      | x           |              | x         | x                  |
| 61         | MMRF_2194 | MMRF_2194_1_BM | Diagnosis   |          | x   | x      | x           | x            | x         | x                  |
|            |           | MMRF_2194_2_BM | Progression | Month 15 | x   | x      | x           | x            | x         | x                  |
| 62         | MMRF_2328 | MMRF_2328_1_BM | Diagnosis   |          | x   | x      | x           |              | x         | x                  |
|            |           | MMRF_2328_2_BM | Progression | Month 27 | x   | x      | x           |              | x         | x                  |
| 63         | MMRF_2373 | MMRF_2373_1_BM | Diagnosis   |          | x   | x      | x           |              | x         | x                  |
|            |           | MMRF_2373_2_BM | Progression | Month 15 | x   | x      | x           |              | x         | x                  |
| 64         | MMRF_2401 | MMRF_2401_1_BM | Diagnosis   |          | x   | x      | x           | x            | x         | x                  |
|            |           | MMRF_2401_2_BM | Progression | Month 3  | x   | x      | x           | x            | x         | x                  |
| 65         | MMRF_2523 | MMRF_2523_1_BM | Diagnosis   |          | x   | x      | x           | x            | x         | x                  |
|            |           | MMRF_2523_2_BM | Progression | Year 2   | x   | x      | x           | x            | x         | x                  |
| 66         | MMRF_2562 | MMRF_2562_1_BM | Diagnosis   |          | x   | x      | x           |              | x         | x                  |
|            |           | MMRF_2562_2_BM | Progression | Month 21 | x   | x      | x           |              | x         | x                  |
| 67         | MMRF_2601 | MMRF_2601_1_BM | Diagnosis   |          | x   | x      | x           |              | x         | x                  |
|            |           | MMRF_2601_2_BM | Progression | Month 18 | x   | x      | x           |              | x         | x                  |
