# Supplementary material for: Clonal evolution after treatment pressure in multiple myeloma: heterogenous genomic aberrations and transcriptomic convergence
Source: PubMed Central journal article supplement (PMC9252918; doi:10.1038/s41375-022-01597-y), 2022-05-28
Supplement: 41375_2022_1597_MOESM7_ESM.pdf [file 41375_2022_1597_MOESM7_ESM.pdf]

**Table S2. CN Purity and Ploidy** were performed using both Facets and Sequenza for all samples. Facets values are shown in the table and used in the dpClust analysis, except \*Sequenza values used (due to either sample failed or untrustable results in Facets). #not included in RNAseq analysis. \*RNAseq not performed. Raw Counts files downloaded from MMRF Researcher gateway. PF: reads passing filter. M : Million

| Patient ID | Sample         | WES | RNAseq | Purity stain | Purity CN | Ploidy | WES             |                      | WES                    |                               | WES - Normal (germline sample) |      | RNAseq      |         | RNAseq      |       | RNAseq |      |
|------------|----------------|-----|--------|--------------|-----------|--------|-----------------|----------------------|------------------------|-------------------------------|--------------------------------|------|-------------|---------|-------------|-------|--------|------|
|            |                |     |        |              |           |        | Total reads (M) | PF reads aligned (M) | Median depth on target | Median depth on target Normal | Reads (M)                      | % PF | % Duplicate | Aligned | Aligned (M) |       |        |      |
| 3          | PD 1           | x   |        |              | 92        | 0.79   | 2.01            | 139.8                | 139.7                  | 184                           |                                |      | 83          |         |             |       |        |      |
|            | PD 2           | x   |        |              | 88        | 0.92   | 2               | 193.6                | 193.5                  | 255                           |                                |      | 83          |         |             |       |        |      |
| 4          | Diagnosis      | x   | x      |              | 95        | 0.98   | 1.97            | 166.4                | 166.4                  | 222                           |                                |      | 91          | 33.9    | 91.90       | 22.80 | 94.60  | 14.7 |
|            | PD 3*          | x   | x      |              | 84        | 0.85   | 1.94            | 142.5                | 142.4                  | 194                           |                                |      | 91          | 38.1    | 91.50       | 29.20 | 95.20  | 16.8 |
| 5          | PD 5           | x   |        |              | 100       | 0.69   | 2.21            | 149.3                | 149.2                  | 203                           |                                |      | 97          |         |             |       |        |      |
|            | PD 6           | x   |        |              | 88        | 0.7    | 2.18            | 165.2                | 165.1                  | 226                           |                                |      | 97          |         |             |       |        |      |
| 7          | Diagnosis      | x   |        |              | 98        | 0.85   | 1.95            | 157.5                | 157.5                  | 208                           |                                |      | 49          |         |             |       |        |      |
|            | PD 1           | x   |        |              | 98        | 0.89   | 1.95            | 148.2                | 148.2                  | 192                           |                                |      | 49          |         |             |       |        |      |
| 8          | PD 1           | x   | x      |              | 98        | 0.3    | 0.97            | 148.9                | 148.9                  | 205                           |                                |      | 68          | 30.7    | 92.40       | 46.10 | 96.80  | 13.7 |
|            | PD 5           | x   | x      |              | 95        | 0.3    | 1.94            | 157.3                | 157.3                  | 214                           |                                |      | 68          | 39.3    | 93.30       | 51.00 | 95.60  | 17.3 |
| 9          | Diagnosis      | x   | x      |              | 98        | 0.93   | 1.98            | 144.4                | 144.4                  | 193                           |                                |      | 62          | 103.2   | 88.40       | 78.10 | 95.30  | 44.2 |
|            | PD 3           | x   | x      |              | 98        | 0.77   | 2.14            | 203.4                | 203.3                  | 333                           |                                |      | 62          | 103.0   | 73.80       | 86.40 | 96.90  | 57.3 |
| 10         | Diagnosis      | x   | x      |              | 98        | 0.88   | 2               | 164.1                | 164.1                  | 224                           |                                |      | 83          | 26.3    | 92.20       | 30.90 | 93.20  | 11.3 |
|            | PD 1           | x   | x      |              | 98        | 0.9    | 1.98            | 150.3                | 150.3                  | 193                           |                                |      | 83          | 32.7    | 91.20       | 34.20 | 93.40  | 13.9 |
| 13         | Diagnosis      | x   |        |              | 98        | 0.94*  | 3.1*            | 167.6                | 167.5                  | 216                           |                                |      | 65          |         |             |       |        |      |
|            | PD 5           | x   |        |              | 95        | 0.5*   | 3*              | 180.4                | 180.3                  | 234                           |                                |      | 89          |         |             |       |        |      |
| 14         | Diagnosis      | x   | x      |              | 100       | 0.87   | 2.17            | 162.4                | 162.4                  | 220                           |                                |      | 87          |         |             |       |        |      |
|            | PD 1           | x   |        |              | 98        | 0.92   | 2.17            | 183.0                | 182.9                  | 245                           |                                |      | 87          |         |             |       |        |      |
|            | PD 2           | x   |        |              | 97        | 0.84   | 2.24            | 138.5                | 138.5                  | 195                           |                                |      | 87          |         |             |       |        |      |
|            | PD 3           | x   |        |              | NA        | 0.8    | 2.49            | 92.1                 | 92.1                   | 150                           |                                |      | 87          |         |             |       |        |      |
| 15         | Diagnosis      | x   | x      |              | 97        | 0.95   | 0.95            | 133.3                | 133.2                  | 181                           |                                |      | 73          | 16.4    | 90.40       | 21.30 | 94.80  | 7.0  |
|            | PD 1           | x   | x      |              | 91        | 0.91   | 0.91            | 178.2                | 178.2                  | 240                           |                                |      | 73          | 29.5    | 90.00       | 34.20 | 94.00  | 12.5 |
|            | PD 2           | x   | x      |              | 91        | 0.92   | 0.92            | 221.6                | 221.5                  | 312                           |                                |      | 73          | 25.9    | 89.30       | 31.90 | 94.10  | 10.9 |
| 17         | Diagnosis      | x   |        |              | 86        | 0.74   | 1.95            | 185.5                | 185.5                  | 257                           |                                |      | 96          |         |             |       |        |      |
|            | PD 1           | x   |        |              | 80        | 0.64   | 1.95            | 184.7                | 184.7                  | 253                           |                                |      | 96          |         |             |       |        |      |
| 18         | Diagnosis      | x   | x      |              | 100       | 0.9    | 2.23            | 207.2                | 207.2                  | 263                           |                                |      | 74          | 147.5   | 85.40       | 74.70 | 94.70  | 59.6 |
|            | PD 1           | x   | x      |              | 100       | 0.89   | 2.21            | 232.6                | 232.5                  | 317                           |                                |      | 74          | 121.8   | 94.00       | 62.70 | 95.20  | 54.5 |
|            | PD 2           | x   | x      |              | 94        | 0.96   | 2.37            | 145.5                | 145.4                  | 200                           |                                |      | 74          | 118.7   | 93.40       | 53.50 | 96.70  | 53.8 |
| 19         | Diagnosis      | x   |        |              | 100       | 0.95   | 2.45            | 217.9                | 217.9                  | 275                           |                                |      | 103         |         |             |       |        |      |
|            | PD 1           | x   |        |              | 98        | 0.97   | 2.27            | 193.5                | 193.5                  | 242                           |                                |      | 103         |         |             |       |        |      |
| 20         | Diagnosis      | x   | x      |              | 90        | 0.88   | 2.06            | 212.3                | 212.3                  | 276                           |                                |      | 78          | 21.6    | 92.80       | 30.20 | 95.40  | 9.6  |
|            | PD 6           | x   | x      |              | 90        | 0.98   | 2.04            | 219.1                | 219.0                  | 286                           |                                |      | 78          | 29.8    | 91.40       | 20.50 | 96.80  | 13.1 |
| 23         | MMRF 1433_1_BM | x   | x      |              | 92*       | 0.82   | 2.5             | 95.1                 | 95.1                   | 120                           |                                |      | 43          | 14.9    | 89.80       | 78.30 | 92.60  | 59.3 |
|            | PD 1           | x   | x      |              | 92*       | 0.77   | 2.44            | 110.9                | 110.8                  | 138                           |                                |      | 43          | 157.9   | 86.00       | 73.20 | 89.90  | 61.0 |
|            | PD 2           | x   | x      |              | NA        | 0.87   | 2.64            | 136.0                | 136.0                  | 207                           |                                |      | 43          | 154.9   | 78.40       | 90.40 | 93.00  | 56.5 |
| 24         | Diagnosis      | x   | x      |              | 98*       | 0.92   | 2.1             | 89.8                 | 89.8                   | 117                           |                                |      | 44          | 153.1   | 83.30       | 80.70 | 95.00  | 60.5 |
|            | PD 2           | x   | x      |              | 92*       | 0.68   | 2.15            | 110.4                | 110.3                  | 146                           |                                |      | 44          | 130.3   | 92.90       | 74.00 | 96.70  | 58.5 |
| 25         | Diagnosis      | x   | x      |              | 96*       | 0.87   | 2.48            | 149.9                | 149.9                  | 186                           |                                |      | 42          | 143.6   | 83.50       | 79.80 | 94.00  | 56.4 |
|            | PD 2           | x   | x      |              | 94*       | 0.83   | 2.48            | 152.3                | 152.3                  | 186                           |                                |      | 42          | 144.1   | 86.80       | 78.30 | 96.40  | 60.3 |
|            | PD 3           | x   | x      |              | >80*      | 0.7    | 2.63            | 161.0                | 161.0                  | 265                           |                                |      | 42          | 120.2   | 91.20       | 74.80 | 96.00  | 52.6 |
| 26         | Diagnosis      | x   | x      |              | 99*       | 0.97*  | 2.3*            | 124.1                | 124.1                  | 160                           |                                |      | 40          | 140.7   | 94.80       | 69.20 | 92.10  | 61.4 |
|            | PD 1           | x   | x      |              | 99*       | 0.98*  | 2.2*            | 132.5                | 132.5                  | 166                           |                                |      | 40          | 173.4   | 89.20       | 73.60 | 93.40  | 72.2 |
|            | PD 2           | x   | x      |              | 98*       | 0.91   | 2.5*            | 127.6                | 127.6                  | 230                           |                                |      | 40          | 145.9   | 90.80       | 67.10 | 95.40  | 63.2 |
| 27         | Diagnosis      | x   | x      |              | 100*      | 0.91   | 2.06            | 122.5                | 122.5                  | 150                           |                                |      | 45          | 147.9   | 89.30       | 71.80 | 95.60  | 61.1 |
|            | PD 1           | x   | x      |              | 100*      | 0.96   | 2.12            | 129.7                | 129.6                  | 160                           |                                |      | 45          | 152.1   | 94.20       | 58.90 | 95.50  | 70.3 |
|            | PD 2           | x   | x      |              | 99*       | 0.98   | 2.23            | 146.9                | 146.9                  | 258                           |                                |      | 45          | 153.7   | 92.90       | 61.20 | 98.40  | 70.9 |
| 28         | Diagnosis      | x   | x      |              | 92*       | 0.94   | 2.67            | 151.7                | 151.6                  | 187                           |                                |      | 47          | 140.7   | 86.90       | 69.40 | 90.30  | 55.2 |
|            | PD 1           | x   | x      |              | 97        | 0.83   | 2.74            | 131.8                | 131.8                  | 164                           |                                |      | 47          | 0.17    | 82.40       | 8.30  | 92.30  | 0.07 |
| 29         | Diagnosis      | x   | x      |              | 97*       | 0.94   | 2.37            | 116.6                | 116.6                  | 147                           |                                |      | 48          | 136.5   | 82.80       | 73.10 | 95.90  | 55.1 |
|            | PD 1           | x   | x      |              | 97*       | 0.91   | 2.41            | 145.1                | 145.1                  | 183                           |                                |      | 48          | 134.7   | 82.80       | 83.70 | 94.00  | 52.4 |
| 30         | Diagnosis      | x   | x      |              | 94*       | 0.95   | 2.31            | 117.9                | 117.8                  | 156                           |                                |      | 35          | 149.3   | 80.00       | 84.80 | 97.60  | 58.3 |
|            | PD 1           | x   | x      |              | 96*       | 0.57   | 2.32            | 141.8                | 141.8                  | 183                           |                                |      | 35          | 163.1   | 85.30       | 84.10 | 97.70  | 67.9 |
| 31         | Diagnosis      | x   | x      |              | 84*       | 0.92   | 2.3             | 94.2                 | 94.2                   | 147                           |                                |      | 39          | 175.4   | 89.60       | 86.80 | 90.70  | 71.3 |
|            | PD 1           | x   | x      |              | 85*       | 0.84   | 2.12            | 90.0                 | 89.9                   | 115                           |                                |      | 39          | 102.5   | 90.10       | 71.30 | 94.20  | 43.5 |
|            | PD 2           | x   | x      |              | 80*       | 0.5    | 2.07            | 143.4                | 143.4                  | 187                           |                                |      | 39          | 112.7   | 85.70       | 69.10 | 94.90  | 46.3 |
| 32         | Diagnosis      | x   | x      |              | 93*       | 0.95   | 2.22            | 118.0                | 117.9                  | 153                           |                                |      | 44          | 136.6   | 93.00       | 78.60 | 94.80  | 60.3 |
|            | PD 1           | x   | x      |              | 99*       | 0.97   | 2.23            | 124.9                | 124.9                  | 162                           |                                |      | 44          | 151.6   | 88.40       | 82.00 | 95.70  | 64.2 |
| 33         | Diagnosis      | x   | x      |              | 96*       | 0.96   | 1.97            | 98.7                 | 98.7                   | 161                           |                                |      | 74          | 195.9   | 86.60       | 91.70 | 97.80  | 65.7 |
|            | PD 1           | x   | x      |              | 92*       | 0.98   | 1.94            | 159.1                | 159.1                  | 273                           |                                |      | 74          | 74.1    | 83.20       | 72.20 | 97.80  | 30.2 |
| 34         | PD 2           | x   | x      |              | 90        | 0.88   | 2.48            | 198.7                | 198.7                  | 279                           |                                |      | 52          | 132.6   | 71.40       | 85.80 | 97.50  | 46.8 |
|            | PD 3           | x   | x      |              | 86        | 0.62   | 4.92            | 139.2                | 139.2                  | 227                           |                                |      | 52          | 110.8   | 81.20       | 75.50 | 97.60  | 43.9 |
|            | PD 4           | x   | x      |              | 85        | 0.87   | 2.51            | 79.3                 | 79.3                   | 119                           |                                |      | 52          | 101.8   | 86.20       | 72.30 | 98.20  | 43.1 |
|            | PD 6           | x   | x      |              | 85        | 0.92   | 2.53            | 124.0                | 124.0                  | 205                           |                                |      | 52          | 112.1   | 87.00       | 75.40 | 96.30  | 47.8 |
| 35         | PD 1           | x   | x      |              | NA        | 0.8    | 2.19            | 111.4                | 111.4                  | 198                           |                                |      | 71          | 109.4   | 83.10       | 85.20 | 93.80  | 42.7 |
|            | PD 2           | x   | x      |              | 80        | 0.72   | 2.42            | 241.7                | 241.7                  | 333                           |                                |      | 71          | 161.8   | 82.90       | 87.70 | 95.10  | 25.3 |
|            | PD 3           | x   | x      |              | NA        | 0.79   | 2.31            | 149.3                | 149.3                  | 195                           |                                |      | 89          | 105.3   | 86.30       | 74.70 | 91.40  | 41.5 |
| 36         | PD 5           | x   | x      |              | NA        | 0.78   | 2.25            | 155.1                | 155.1                  | 281                           |                                |      | 99          | 109.9   | 75.70       | 82.50 | 93.00  | 38.7 |
| 39         | Diagnosis      | x   |        |              | NA        | 0.77   | 2.24            | 130.2                | 130.2                  | 233                           |                                |      | 93          |         |             |       |        |      |
|            | PD 1           | x   |        |              | 80        | 0.55   | 2.43            | 110.2                | 110.2                  | 155                           |                                |      | 93          |         |             |       |        |      |
| 40         | MMRF 1157_1_BM | NA  |        |              | NA        | 0.98   | 1.94            | 138.0                | 137.9                  | 95                            |                                |      | 70          |         |             |       |        |      |
|            | MMRF 1157_2_BM | NA  |        |              | NA        | 0.97   | 1.95            | 124.0                | 123.9                  | 77                            |                                |      | 70          |         |             |       |        |      |
|            | MMRF 1157_4_BM | NA  |        |              | NA        | 0.98   | 1.98            | 115.5                | 115.4                  | 74                            |                                |      | 70          |         |             |       |        |      |
|            | MMRF 1157_5_BM | NA  |        |              | NA        | 0.97   | 1.96            | 115.1                | 115.1                  | 70                            |                                |      | 70          |         |             |       |        |      |
| 41         | MMRF 1179_1_BM | NA  |        |              | NA        | 0.97   | 1.92            | 136.1                | 136.0                  | 85                            |                                |      | 88          |         |             |       |        |      |
|            | MMRF 1179_2_BM | NA  |        |              | NA        | 0.97   | 1.97            | 113.8                | 113.8                  | 72                            |                                |      | 88          |         |             |       |        |      |
| 42         | MMRF 1285_1_BM | NA  |        |              | NA        | 0.91   | 2.27            | 117.6                | 117.6                  | 86                            |                                |      | 90          |         |             |       |        |      |
|            | MMRF 1285_2_BM | NA  |        |              | NA        | 0.91   | 2.21            | 93.9                 | 93.9                   | 74                            |                                |      | 90          |         |             |       |        |      |
| 43         | MMRF 1433_1_BM | NA  |        |              | NA        | 0.97   | 2.04            | 56.7                 | 56.7                   | 44                            |                                |      | 80          |         |             |       |        |      |
|            | MMRF 1433_2_BM | NA  |        |              | NA        | 0.82   | 2.04            | 101.1                | 101.1                  | 68                            |                                |      | 80          |         |             |       |        |      |
|            | MMRF 1433_5_BM | NA  |        |              | NA        | 0.97   | 1.99            | 98.9                 | 98.9                   | 75                            |                                |      | 80          |         |             |       |        |      |
| 44         | MMRF 1534_1_BM | NA  |        |              | NA        | 0.92   | 2.09            | 68.8                 | 68.8                   | 54                            |                                |      | 63          |         |             |       |        |      |
|            | MMRF 1534_5_BM | NA  |        |              | NA        | 0.92   | 2.06            | 101.3                | 101.3                  | 78                            |                                |      | 63          |         |             |       |        |      |
| 45         | MMRF 1555_1_BM | NA  |        |              | NA        | 0.94   | 2.06            | 120.7                | 120.6                  | 78                            |                                |      | 63          |         |             |       |        |      |
|            | MMRF 1555_3_BM | NA  |        |              | NA        | 0.86   | 2.1             | 117.3                | 117.2                  | 84                            |                                |      | 63          |         |             |       |        |      |
| 46         | MMRF 1587_1_BM | NA  |        |              | NA        | 0.98   | 1.92            | 116.2                | 116.2                  | 89                            |                                |      | 97          |         |             |       |        |      |
|            | MMRF 1587_2_BM | NA  |        |              | NA        | 0.95   | 1.96            | 108.7                | 108.7                  | 79                            |                                |      | 97          |         |             |       |        |      |
| 47         | MMRF 1627_1_BM | NA  |        |              | NA        | 0.97   | 2.03            | 127.9                | 127.8                  | 78                            |                                |      | 76          |         |             |       |        |      |
