# Supplementary material for: Clonal evolution after treatment pressure in multiple myeloma: heterogenous genomic aberrations and transcriptomic convergence
Source: PubMed Central journal article supplement (PMC9252918; doi:10.1038/s41375-022-01597-y), 2022-05-28
Supplement: 41375_2022_1597_MOESM8_ESM.pdf [file 41375_2022_1597_MOESM8_ESM.pdf]

**Table S3. A) Clinical data for the patients included from St.Olavs hospital and Rotterdam (n=house cohort).**

S: Sample, TSD: Time since diagnosis, D = Diagnosis = diagnosis symptomatic MM (before first treatment), P = progression

Abnormalities FISH: \* = tested for t(4;16) and del17 only, \*\* = tested for t(1;14), del17 and del13, \*\*\* = tested for t(4;16), t(1;14), t(14;14), t(14;16), nd = not detected

| Patient | Sex    | Age | Site   | Ig class | Light chain                    | Abnormalities FISH | IS | R-DS   | Response initial treatment S1-TSD | Treatment prior to S1 | IMiD received S1-2 | Pi received S1-2 | HDM received S1-2 | Interwening treatment* S1-42 | Best response S1-42 | Interval S1-42 [month] | IMiD received S2-3 | Pi received S2-3 | HDM received S2-3 | Interwening treatment S2-43 | Best response S2-43 | Interval S2-43 [month] | Interwening treatment S3-54 | Best response S3-54 | Interwening treatment S4-55 | PIE, months | death occurred [y:m] | OS, months |  |  |  |
|---------|--------|-----|--------|----------|--------------------------------|--------------------|----|--------|-----------------------------------|-----------------------|--------------------|------------------|-------------------|------------------------------|---------------------|------------------------|--------------------|------------------|-------------------|-----------------------------|---------------------|------------------------|-----------------------------|---------------------|-----------------------------|-------------|----------------------|------------|--|--|--|
| 17      | Male   | 84  | IGA    | Lambda   | del17**                        |                    | 3  | 3 PR   | 0                                 | 0                     | x                  |                  |                   | MPR                          | PR                  | 7                      |                    |                  |                   |                             |                     |                        |                             |                     |                             |             |                      |            |  |  |  |
| 18      | Female | 61  | IGA    | Kappa    | nd*                            |                    | 3  | VGPR   | 0                                 | 0                     |                    |                  | x                 | VCD/HDM                      | VGPR                | 35                     |                    |                  |                   |                             |                     |                        |                             |                     |                             |             |                      |            |  |  |  |
| 15      | Male   | 67  | IGA    | Kappa    | t(4;14)*                       |                    | 3  | 1 VGPR | 0                                 | 0                     | x                  |                  | x                 | MPR / S maint                | VGPR                | 48                     |                    |                  |                   | VCD                         | VGPR                | 13                     | PR                          |                     |                             |             |                      |            |  |  |  |
| 9       | Female | 73  | IGG    | Kappa    | nd*                            |                    | 1  | 1 PR   | 0                                 | 0                     | x                  | x                |                   | MPV, VCD                     | PR                  | 25                     |                    |                  |                   |                             |                     |                        |                             |                     |                             |             |                      |            |  |  |  |
| 14      | Female | 77  | IGG    | Kappa    | del13**                        |                    | 2  | 2 VGPR | 0                                 | 0                     |                    |                  |                   | MP                           | VGPR                | 15                     |                    |                  |                   |                             |                     |                        |                             |                     |                             |             |                      |            |  |  |  |
| 10      | Female | 76  | IGA    | Kappa    | t(4;14)*                       |                    | 2  | PR     | 0                                 | 0                     | x                  |                  |                   | MPR                          | PR                  | 16                     |                    |                  |                   | MPV                         | SD                  | 24                     | CVD                         | PR                  |                             |             |                      |            |  |  |  |
| 18      | Male   | 68  | IGG    | Kappa    | nd*                            |                    | 1  | 1 VGPR | 0                                 | 0                     |                    |                  | x                 | VCD                          | VGPR                | 17                     |                    |                  |                   |                             |                     |                        |                             |                     |                             |             |                      |            |  |  |  |
| 7       | Female | 78  | Lambda | del17**  |                                |                    | 3  | 3 PR   | 0                                 | 0                     |                    |                  |                   | CVD                          | PR                  | 11                     |                    |                  |                   |                             |                     |                        |                             |                     |                             |             |                      |            |  |  |  |
| 31      | Male   | 67  | IGG    | Lambda   | t(4;14)*                       |                    | 3  | 3 VGPR | 0                                 | 0                     | x                  |                  |                   | MPV/T maint                  | VGPR                | 14                     |                    |                  |                   |                             |                     |                        |                             |                     |                             |             |                      |            |  |  |  |
| 20      | Female | 54  | IGG    | Kappa    | t(1;14)***                     |                    | 2  | 3 VGPR | 0                                 | 0                     | x                  | x                | x                 | CVD/HDM,MPV,TP,RP,CP         | cCR                 | 50                     |                    |                  |                   | VTD                         | VGPR                | 5                      |                             |                     |                             |             |                      |            |  |  |  |
| 4       | Female | 52  | IGG    | Lambda   | t(1;14), del17 (21%), del13*** |                    | 2  | 2 PR   | 0                                 | 0                     |                    |                  | x                 | VCD/HDM, MPV                 | PR                  | 39                     |                    |                  |                   |                             |                     |                        |                             |                     |                             |             |                      |            |  |  |  |
| 32      | Female | 71  | IGG    | Kappa    | del17*                         |                    | 2  | 2 VGPR | 0                                 | 0                     |                    |                  |                   | MPV/T maint                  | VGPR                | 18                     |                    |                  |                   |                             |                     |                        |                             |                     |                             |             |                      |            |  |  |  |
| 13      | Male   | 65  | IGD    | Lambda   | nd**                           |                    | 3  | 2 VGPR | 0                                 | 0                     | x                  | x                | x                 | CD/HDM, MPV, CVD, MPT, RP    | CR                  | 70                     |                    |                  |                   |                             |                     |                        |                             |                     |                             |             |                      |            |  |  |  |
| 39      | Male   | 60  | IGG    | Kappa    | t(4;14)                        |                    | 2  | 2 VGPR | 0                                 | 0                     |                    |                  | x                 | VCD/HDM                      | VGPR                | 15                     |                    |                  |                   |                             |                     |                        |                             |                     |                             |             |                      |            |  |  |  |
| 23      | Male   | 58  | IGA    | Kappa    | nd*                            |                    | 1  | 1 VGPR | 0                                 | 0                     | x                  | x                |                   | VCD/VMP/R maint              | VGPR                | 25                     |                    |                  |                   |                             |                     |                        |                             |                     |                             |             |                      |            |  |  |  |
| 24      | Female | 62  | IGG    | Kappa    | t(1;14)†                       |                    | 3  | 2 PR   | 0                                 | 0                     | x                  | x                |                   | VCD, RD, cyclo, MPT          | <PR                 | 24                     |                    |                  |                   |                             |                     |                        |                             |                     |                             |             |                      |            |  |  |  |
| 25      | Male   | 49  | IGG    | Kappa    | nd*                            |                    | 2  | 2 PR   | 0                                 | 0                     | x                  | x                |                   | VCD, RD, VCD/HDM             | PR                  | 16                     |                    |                  |                   | VTD                         |                     | 23                     |                             |                     |                             |             |                      |            |  |  |  |
| 26      | Male   | 51  | IGA    | Lambda   | nd*                            |                    | 3  | 2 CR   | 0                                 | 0                     | x                  | x                | x                 | VCD/HDM/R maint              | CR                  | 14                     |                    |                  |                   |                             |                     |                        |                             |                     |                             |             |                      |            |  |  |  |
| 27      | Male   | 51  | IGG    | Kappa    | t(4;14)†                       |                    | 3  | 3 VGPR | 0                                 | 0                     | x                  | x                | x                 | VCD/HDM, VCD/R maint         | VGPR                | 17                     |                    |                  |                   |                             |                     |                        |                             |                     |                             |             |                      |            |  |  |  |
| 28      | Male   | 50  | IGG    | Kappa    | nd*                            |                    | 2  | 2 VGPR | 0                                 | 0                     | x                  | x                |                   | VCD/HDM/R maint              | VGPR                | 9                      |                    |                  |                   |                             |                     |                        |                             |                     |                             |             |                      |            |  |  |  |
| 29      | Male   | 42  | IGG    | Kappa    | nd*                            |                    | 2  | 2 <PR  | 0                                 | 0                     |                    |                  |                   | VCD/VMP                      | <PR                 | 5                      |                    |                  |                   |                             |                     |                        |                             |                     |                             |             |                      |            |  |  |  |
| 30      | Female | 62  | IGG    | Kappa    | nd*                            |                    | 2  | 2 PR   | 0                                 | 0                     |                    |                  |                   | VCD/VMP                      | PR                  | 12                     |                    |                  |                   |                             |                     |                        |                             |                     |                             |             |                      |            |  |  |  |
| 33      | Female | 64  | IGG    | Kappa    | t(1;14), del13q†               |                    | 2  | 1 PR   | 0                                 | 0                     | x                  | x                | x                 | VCD/HDM/R maint              | <PR                 | 18                     |                    |                  |                   |                             |                     |                        |                             |                     |                             |             |                      |            |  |  |  |
| 3       | Female | 48  | IGA    | Kappa    | del17*                         |                    | 1  | CR     | 29                                | VD/HDM                |                    |                  | x                 | VCD/HDM                      | CR                  | 15                     |                    |                  |                   |                             |                     |                        |                             |                     |                             |             |                      |            |  |  |  |
| 8       | Male   | 50  | IGG    | Lambda   | nd**                           |                    | 1  | PR     | 25                                | VCD/HDM               |                    |                  | x                 | RD, VCD, pom, TD             | SD                  | 9                      |                    |                  |                   |                             |                     |                        |                             |                     |                             |             |                      |            |  |  |  |
| 35      | Female | 76  | IGG    | Kappa    | del13**                        |                    | 2  | SD     | 48                                | MPR                   |                    |                  | x                 | MPV                          | VGPR                | 24                     |                    |                  |                   |                             |                     |                        |                             |                     |                             |             |                      |            |  |  |  |
| 34      | Male   | 48  | IGG    | Lambda   | nd*                            |                    | 2  | 2 CR   | 113                               | CD/HDM, VCD, HDM      |                    |                  | x                 | CR                           | PR                  | 9                      |                    |                  |                   |                             |                     |                        |                             |                     |                             |             |                      |            |  |  |  |
| 36      | Male   | 51  | IGG    | Kappa    | nd*                            |                    | 1  | CR     | 138                               | v4d/HDM, CD/HDM       |                    |                  | x                 | CR                           | PR                  | 36                     |                    |                  |                   |                             |                     |                        |                             |                     |                             |             |                      |            |  |  |  |
| 5       | Female | 61  | IGG    | Lambda   | nd*                            |                    | 2  | 2 VGPR | 83                                | CD/HDM, MPV, VD, VMD  |                    |                  | x                 | VCD, RD, RD                  | PR                  | 16                     |                    |                  |                   |                             |                     |                        |                             |                     |                             |             |                      |            |  |  |  |

C: cyclophosphamide  
D: dexamethasone  
P: prednisolone  
V: vincristine  
R: rituximab  
M: melphalan  
T: thalidomide  
pom: pomalidomide  
v: venetoclax  
A: acetylsalicylic acid  
HDM: high dose melphalan (ASCT)  
benda: bendamustine
