# Supplementary material for: Clonal evolution after treatment pressure in multiple myeloma: heterogenous genomic aberrations and transcriptomic convergence
Source: PubMed Central journal article supplement (PMC9252918; doi:10.1038/s41375-022-01597-y), 2022-05-28
Supplement: 41375_2022_1597_MOESM9_ESM.pdf [file 41375_2022_1597_MOESM9_ESM.pdf]

**Table S3. B)** Clinical data for the patients included from the IA13 CoMMpass study. FISHseq; Canonical Translocations identified by long-insert Whole Genome Sequencing. S:Sample, nd: not detected. NA: no data. Survival data was updated using the IA16 CoMMpass version.

| Patient_ID | Patient Age | Sex    | Ig class | light chain | FISHseq  | ONV    | ISS | R-ISS | IMiD received S1-2 | PI received S1-2 | HDM received S1-2 | Intervening treatment* S1-S2 | Best response S1-S2 | Interval S1-S2 (months) | Treatment S2-S3       | Best response | Interval S2-S3 | Treatment S3 | Response | Interval S3-S4 | Treatment S4 | Response | PFS, months | death occurred (y=1) | OS/Last follow-up (months) |    |
|------------|-------------|--------|----------|-------------|----------|--------|-----|-------|--------------------|------------------|-------------------|------------------------------|---------------------|-------------------------|-----------------------|---------------|----------------|--------------|----------|----------------|--------------|----------|-------------|----------------------|----------------------------|----|
| 40         | 69          | Female | Unknown  | Kappa       | t(11;14) |        | 1   |       | x                  |                  | x                 | VCD/VRCd/VCD/HDM/R/RD        | VGPR                | 21                      | Carfilz/Carfilz/CarfD | VGPR          |                | 12           | PomDara  | VGPR           | 21           | SeId     | VGPR        | 18                   | 0                          | 72 |
| 41         | 80          | Male   | IgA      | Kappa       | t(4;14)  | del13q | 2   |       | x                  |                  | x                 | VRD/VRCd/Carf/VRD/CarfT      | VGPR                | 36                      | Dara                  | SD            |                |              |          |                |              |          | 18          | 1                    | 65                         |    |
| 42         | 75          | Male   | IgG      | Kappa       | nd       | del13q | 1   |       |                    |                  | x                 | VCD/V                        | VGPR                | 30                      | VRD                   | VGPR          |                |              |          |                |              |          | 26          | 1                    | 67                         |    |
| 43         | 55          | Male   | IgG      | Lambda      | t(4;14)  | del13q | 1   | 2     | x                  |                  | x                 | VRD/HDM/HDM                  | VGPR                | 30                      | CarfRD/PomD/RPembD    | PR            |                | 21           | DikalDA  | SD             |              |          |             | 29                   | 1                          | 72 |
| 44         | 64          | Male   | IgG      | Kappa       | t(11;14) |        | 1   | 1     | x                  |                  | x                 | VRD/HDM/R/VenD               | VGPR                | 45                      | Dara                  | PR            |                |              |          |                |              |          | 5           | 0                    | 71                         |    |
| 45         | 39          | Female | Unknown  | Kappa       | t(11;14) |        | 1   | 1     |                    |                  | x                 | VRD/HDM/R/VenD               | sCR                 | 36                      | CarfRD                | VGPR          |                |              |          |                |              |          | 37          | 0                    | 43                         |    |
| 46         | 74          | Male   | Unknown  | Kappa       | na       |        | 3   | 2     | x                  |                  | x                 | VCD/VD/VCD/VRD               | PR                  | 18                      |                       | NA            |                |              |          |                |              |          | 7           | 1                    | 21                         |    |
| 47         | 82          | Female | Unknown  | Lambda      | t(4;14)  |        | 3   | 3     | x                  |                  | x                 | VD/R/RD/R                    | VGPR                | 21                      | R                     | VGPR          |                |              |          |                |              |          | 19          | 1                    | 52                         |    |
| 48         | 67          | Female | Unknown  | Kappa       | nd       | del13q | 3   | 2     | x                  |                  | x                 | VD/R                         | VGPR                | 18                      | Pom                   | NA            |                |              |          |                |              |          | 17          | 1                    | 23                         |    |
| 49         | 70          | Female | IgA      | Lambda      | nd       |        | 3   | 2     | x                  |                  | x                 | HDM/VRD/VCD                  | VGPR                | 18                      |                       | NA            |                |              |          |                |              |          | 10          | 1                    | 17                         |    |
| 50         | 68          | Male   | IgG      | Kappa       | t(11;14) |        | 1   |       | x                  |                  | x                 | VCD/R/CarfD/CarfPomD         | PR                  | 36                      | CarfPomD/Carf         | SD            |                |              |          |                |              |          | 2           | 0                    | 65                         |    |
| 51         | 75          | Male   | IgG      | Kappa       | nd       | del13q | 3   | 2     | x                  |                  | x                 | VRD/VRCd/Carf/Pom            | PR                  | 18                      |                       | NA            |                |              |          |                |              |          | 9           | 1                    | 19                         |    |
| 52         | 45          | Female | IgG      | Lambda      | nd       |        | 3   | 2     | x                  |                  | x                 | VCD/VRCd/HDM/RD              | CR                  | 39                      | Dara/CarfPomD         | PR            |                |              |          |                |              |          | 36          | 0                    | 66                         |    |
| 53         | 75          | Female | IgG      | Lambda      | nd       |        | 3   | 2     |                    |                  | x                 | CarfMPD                      | sCR                 | 42                      |                       | NA            |                |              |          |                |              |          | 42          | 0                    | 67                         |    |
| 54         | 68          | Female |          |             | t(6;14)  | del13q | 1   | 2     | x                  |                  | x                 | HDM/T                        | CR                  | 33                      |                       | NA            |                |              |          |                |              |          | 32          | 0                    | 45                         |    |
| 55         | 72          | Female |          |             | nd       |        | 3   | 2     |                    |                  | x                 | VMP                          | VGPR                | 18                      | RD                    | VGPR          |                |              |          |                |              |          | 17          | 0                    | 59                         |    |
| 56         | 53          | Female | IgG      | Kappa       | t(11;14) |        | 3   | 2     | x                  |                  | x                 | HDM                          | PR                  | 15                      | RPanod                | PR            |                |              |          |                |              |          | 15          | 0                    | 51                         |    |
| 57         | 57          | Male   | IgG      | Lambda      | t(12;14) |        | 3   | 2     | x                  |                  | x                 | HDM                          | sCR                 | 27                      | CarfPomD              | VGPR          |                |              |          |                |              |          | 26          | 0                    | 63                         |    |
| 58         | 66          | Female |          |             | nd       | del13q | 3   | 2     |                    |                  | x                 | VMP                          | VGPR                | 9                       | RD                    | PD            |                |              |          |                |              |          | 8           | 1                    | 15                         |    |
| 59         | 67          | Female | IgA      | Lambda      | t(4;14)  | del13q | 2   | 2     | x                  |                  | x                 | VRD                          | VGPR                | 18                      | IxaRD                 | VGPR          |                |              |          |                |              |          | 11          | 0                    | 62                         |    |
| 60         | 70          | Male   | IgG      | Kappa       | t(14;20) |        | 2   |       | x                  |                  | x                 | VRD/RD                       | PR                  | 21                      |                       | NA            |                |              |          |                |              |          | 11          | 1                    | 19                         |    |
| 61         | 75          | Male   | Unknown  | Kappa       | t(11;14) | del17p | 2   | 2     |                    |                  | x                 | VMP                          | VGPR                | 15                      | RD                    | SD            |                |              |          |                |              |          | 15          | 1                    | 36                         |    |
| 62         | 66          | Male   | IgG      | Kappa       | t(4;14)  | del13q | 3   | 3     | x                  |                  | x                 | VCD/VD/RD                    | VGPR                | 27                      | RD                    | PD            |                |              |          |                |              |          | 21          | 1                    | 33                         |    |
| 63         | 67          | Male   | Unknown  | Kappa       | t(8;14)  |        | 1   | 2     | x                  |                  | x                 | HDM                          | PD                  | 15                      | CarfRD                | PD            |                |              |          |                |              |          | 3           | 1                    | 18                         |    |
| 64         | 64          | Male   |          |             | t(4;14)  | del13q | 3   | 3     | x                  |                  | x                 | VTD                          | PD                  | 3                       | VCD                   | SD            |                |              |          |                |              |          | 3           | 1                    | 13                         |    |
| 65         | 55          | Female | IgA      | Lambda      | nd       |        | 3   |       | x                  |                  | x                 | VD/VRD                       | VGPR                | 24                      | VD                    | NA            |                |              |          |                |              |          | 19          | 1                    | 22                         |    |
| 66         | 66          | Male   | Unknown  | Kappa       | nd       | del13q | 2   | 2     | x                  |                  | x                 | VRD/CarfD                    | PR                  | 21                      |                       | NA            |                |              |          |                |              |          | 7           | 1                    | 40                         |    |
| 67         | 70          | Female |          |             | nd       | del13q | 2   | 2     |                    |                  | x                 | VMP                          | VGPR                | 18                      | RD                    | PR            |                |              |          |                |              |          | 19          | 0                    | 50                         |    |

\*Treatment:  
C: cyclophosphamide  
D: dexamethasone  
P: prednisone  
V: velcade/bortezomib  
R: revlimid/lenalidomide  
T: thalidomide  
Pom: pomalidomide  
HDM: high dose melphalan (ASCT)  
Carf: carfilzomib  
Pano: panobinostat  
Pemb: pembrolizumab  
Sei: selinexor  
IDa: IDASAN UTLIN-D  
Ven: venetoclax  
Dara: daratumumab
