# Supplementary material for: Clonal evolution after treatment pressure in multiple myeloma: heterogenous genomic aberrations and transcriptomic convergence
Source: PubMed Central journal article supplement (PMC9252918; doi:10.1038/s41375-022-01597-y), 2022-05-28
Supplement: 41375_2022_1597_MOESM10_ESM.pdf [file 41375_2022_1597_MOESM10_ESM.pdf]

**Table S4.** Driver genes according to references\*

| <b>Gene</b> | <b>Category</b> |
|-------------|-----------------|
| MAX         | Driver gene     |
| TP53        | Driver gene     |
| FAM46C      | Driver gene     |
| DIS3        | Driver gene     |
| BRAF        | Driver gene     |
| KRAS        | Driver gene     |
| NRAS        | Driver gene     |
| TRAF3       | Driver gene     |
| DUSP2       | Driver gene     |
| TCL1A       | Driver gene     |
| TRAF2       | Driver gene     |
| CYLD        | Driver gene     |
| LTB         | Driver gene     |
| HIST1H1E    | Driver gene     |
| BCL7A       | Driver gene     |
| SP140       | Driver gene     |
| NFKBIA      | Driver gene     |
| EGR1        | Driver gene     |
| PABPC1      | Driver gene     |
| PRKD2       | Driver gene     |
| TBC1D29     | Driver gene     |
| IRF4        | Driver gene     |
| RB1         | Driver gene     |
| TGDS        | Driver gene     |
| PTPN11      | Driver gene     |
| FUBP1       | Driver gene     |
| RPL5        | Driver gene     |
| FGFR3       | Driver gene     |
| SAMHD1      | Driver gene     |
| ACTG1       | Driver gene     |
| HIST1H1B    | Driver gene     |
| NFKB2       | Driver gene     |
| KMT2B       | Driver gene     |
| KLHL6       | Driver gene     |
| RASA2       | Driver gene     |
| PIM1        | Driver gene     |
| PRDM1       | Driver gene     |
| DTX1        | Driver gene     |
| SETD2       | Driver gene     |
| BHLHE41     | Driver gene     |
| RPL10       | Driver gene     |
| BTG1        | Driver gene     |
| RPS3A       | Driver gene     |
| CCND1       | Driver gene     |
| RPRD1B      | Driver gene     |
| HIST1H1D    | Driver gene     |
| ZNF292      | Driver gene     |
| RFTN1       | Driver gene     |
| CDKN1B      | Driver gene     |
| LCE1D       | Driver gene     |
| XBP1        | Driver gene     |
| IRF1        | Driver gene     |
| HIST1H2BK   | Driver gene     |
| POT1        | Driver gene     |
| HUWE1       | Driver gene     |
| UBR5        | Driver gene     |
| USP7        | Driver gene     |
| MAN2C1      | Driver gene     |
| MAML2       | Driver gene     |
| ABCF1       | Driver gene     |
| CDKN2C      | Driver gene     |
| ATM         | Driver gene     |
| KMT2C       | Driver gene     |
| CREBBP      | Driver gene     |
| ARID1A      | Driver gene     |
| ATRX        | Driver gene     |
| NF1         | Driver gene     |
| EP300       | Driver gene     |
| TET2        | Driver gene     |
| KDM5C       | Driver gene     |
| ARID2       | Driver gene     |
| DNMT3A      | Driver gene     |
| KDM6A       | Driver gene     |
| SF3B1       | Driver gene     |
| MAF         | Driver gene     |
| NCOR1       | Driver gene     |
| MAFB        | Driver gene     |
| IDH1        | Driver gene     |
| IDH2        | Driver gene     |
| PIK3CA      | Driver gene     |

\*Driver gene: Identified myeloma driver gene (Maura et al, Nature Communications, 2019; Waker B et al, Blood, 2018) [4,5]
