# Supplementary material for: Clonal evolution after treatment pressure in multiple myeloma: heterogenous genomic aberrations and transcriptomic convergence
Source: PubMed Central journal article supplement (PMC9252918; doi:10.1038/s41375-022-01597-y), 2022-05-28
Supplement: 41375_2022_1597_MOESM11_ESM.pdf [file 41375_2022_1597_MOESM11_ESM.pdf]

Table S5. Evolution patterns, SNVs and CNA in all samples

| Patient_ID | ig-T/HRD  | Sample1   | Sample2   | Sample 3  | Sample 4  | Evolution pattern S1 - S2    | Evolution pattern S2 - S3    | Evolution pattern S3 - S4 | Mutations/CNA <sup>a</sup> at Sample 1                                                         | Mutations/CNA <sup>a</sup> at Sample 2                                                 | Mutations/CNA <sup>a</sup> at Sample 3                                                             | Mutations/CNA <sup>a</sup> at Sample 4                     |
|------------|-----------|-----------|-----------|-----------|-----------|------------------------------|------------------------------|---------------------------|------------------------------------------------------------------------------------------------|----------------------------------------------------------------------------------------|----------------------------------------------------------------------------------------------------|------------------------------------------------------------|
| 21         | (1;12)    | Diagnosis | Relapse 1 | Relapse 2 |           | Differential Clonal Response | Differential Clonal Response |                           | PRKD2, NRAS G12D(amp1q21)                                                                      | PRKD2, NRAS G12D(amp1q21)                                                              | PRKD2, NRAS G12D(amp1q21)                                                                          |                                                            |
| 23         | HRD       | Diagnosis | Relapse 1 | Relapse 2 |           | Differential Clonal Response | Differential Clonal Response |                           | BRAF(sub) / amp1q21                                                                            | BRAF(sub), PTNN1 <sup>+</sup> , KRAS Q61H(sub) / amp1q21                               | PTNN1(sub), KRAS Q61H(sub) / gain1q21                                                              |                                                            |
| 26         | HRD       | Diagnosis | Relapse 1 | Relapse 2 |           | Differential Clonal Response | Differential Clonal Response |                           | ATM, NCOR1, NRAS Q61K(sub) / gain1q21                                                          | ATM, NCOR1 / gain1q21                                                                  | ATM, NCOR1, KRAS D119H(sub) / amp1q21                                                              |                                                            |
| 19         | unknown   | Diagnosis | Relapse 1 |           |           | Differential Clonal Response |                              |                           | NRAS Q61K                                                                                      | NRAS Q61K(amp1q21)                                                                     |                                                                                                    |                                                            |
| 20         | (1;12)    | Diagnosis | Relapse 6 |           |           | Differential Clonal Response |                              |                           | PRKD2, KRAS A146P, FAM66C / gain1q21                                                           | PRKD2, KRAS A146P, NCOR1(sub), TP53(sub), IRF4 <sup>+</sup> / amp1q21                  |                                                                                                    |                                                            |
| 4          | (1;11;14) | Diagnosis | Relapse 3 |           |           | Differential Clonal Response |                              |                           | POT1 / amp1q21, del1p22                                                                        | CAND1 / gain1q21, del1p22                                                              |                                                                                                    |                                                            |
| 32         | HRD       | Diagnosis | Relapse 1 |           |           | Differential Clonal Response |                              |                           | BRAF, KMT2C(inDel), RPL10(sub), UBR5(inDel, sub) / gain1q21                                    | BRAF, KMT2C(inDel), RPL10, RB1(sp), FAM66C(inDel, sub) / gain1q21                      |                                                                                                    |                                                            |
| 13         | unknown   | Diagnosis | Relapse 5 |           |           | Differential Clonal Response |                              |                           | DUSP2, NRAS Q61R, TET2(sp) / gain1q21                                                          | DUSP2, NRAS Q61R, TET2(sp), IRF4, PSM21(inDel, sub) / amp1q21                          |                                                                                                    |                                                            |
| 39         | (1;14)    | Diagnosis | Relapse 1 |           |           | Differential Clonal Response |                              |                           | KRAS A146V, HUWE1(inDel, sub)                                                                  | KRAS A146V, IRF4 <sup>+</sup> / gain1q21                                               |                                                                                                    |                                                            |
| 24         | (1;11;14) | Diagnosis | Relapse 2 |           |           | Differential Clonal Response |                              |                           | CSPT1, UBR5(sp, sub), SF3B1(sub), KRAS Q61H, KRAS G13C(sub)                                    | CSPT1, UBR5(sp, sub), SF3B1(sub), KRAS Q61H(sub), KRAS G13C, DIS3(sub) <sup>+</sup>    |                                                                                                    |                                                            |
| 28         | HRD       | Diagnosis | Relapse 1 |           |           | Differential Clonal Response |                              |                           | KRAS G12D, RFTN1, ZNF827, PIK3CA, KMT2B(sub) / amp1q21, del1p22                                | KRAS G12D, RFTN1, ZNF827, FAM66C / amp1q21, del1p22                                    |                                                                                                    |                                                            |
| 33         | (1;11;14) | Diagnosis | Relapse 1 |           |           | Differential Clonal Response |                              |                           | NRAS Q61K, ARID1A(inDel, sub), DIS3(inDel, sub)                                                | NRAS Q61K(sub), KRAS Q61H(sub) / del1p22                                               |                                                                                                    |                                                            |
| 43         | (1;14)    | Diagnosis | Relapse   |           |           | Differential Clonal Response | Stable evolution             |                           | DIS3, PRKD2, TCL1A, RPL5(inDel, sub) / amp1q21                                                 | DIS3, PRKD2, TCL1A, RPL5(inDel, sub), ATM(sub) / amp1q21                               | DIS3, PRKD2, TCL1A, RPL5(inDel, sub), ATM / amp1q21                                                |                                                            |
| 50         | (1;11;14) | Diagnosis | Relapse   |           |           | Differential Clonal Response |                              |                           | KRAS Q61H / amp1q21                                                                            | KRAS Q61H / amp1q21                                                                    |                                                                                                    |                                                            |
| 54         | (1;16;14) | Diagnosis | Relapse   |           |           | Differential Clonal Response |                              |                           | NRAS Q61R(sub), TRAF3(inDel) / gain1q21                                                        | NRAS Q61R, TRAF3(inDel) / amp1q21                                                      |                                                                                                    |                                                            |
| 42         | HRD       | Diagnosis | Relapse   |           |           | Differential Clonal Response |                              |                           | ZNF292, IRF4(sub), TRAF3(sub) / gain1q21                                                       | ZNF292, NRAS Q61K / gain1q21                                                           |                                                                                                    |                                                            |
| 48         | HRD       | Diagnosis | Relapse   |           |           | Differential Clonal Response |                              |                           | NRAS Q61K(sub), UBR5(sub) / gain1q21                                                           | NRAS Q61K, UBR5, RB1(sp) / amp1q21                                                     |                                                                                                    |                                                            |
| 49         | HRD       | Diagnosis | Relapse   |           |           | Differential Clonal Response |                              |                           | KMT2C(sub), ZNF292(inDel) / del1p22, amp1q21                                                   | ZNF292(inDel), FAM66C, FGFR3, KRAS Q61H / del1p22, gain1q21                            |                                                                                                    |                                                            |
| 51         | HRD       | Diagnosis | Relapse   |           |           | Differential Clonal Response |                              |                           | SAMHD1, NRAS Q61K(sub), PTNN1 <sup>+</sup> / del1p22                                           | SAMHD1, NRAS Q61K / del1p22, gain1q21                                                  |                                                                                                    |                                                            |
| 52         | HRD       | Diagnosis | Relapse   |           |           | Differential Clonal Response |                              |                           | NRAS Q61R, NCOR1(sp), RPL10(sub)                                                               | NRAS Q61R, NCOR1(sp), RPL10, BHLHE41(inDel), CUL4B / gain1q21                          |                                                                                                    |                                                            |
| 53         | HRD       | Diagnosis | Relapse   |           |           | Differential Clonal Response |                              |                           | / gain1q21                                                                                     | TRAF3 <sup>+</sup> / gain1q21                                                          |                                                                                                    |                                                            |
| 55         | HRD       | Diagnosis | Relapse   |           |           | Differential Clonal Response |                              |                           | KRAS G13R(sub), NRAS G12D(sub) / gain1q21                                                      | KRAS G13R(sub), NRAS G12D(sub) / gain1q21                                              |                                                                                                    |                                                            |
| 58         | HRD       | Diagnosis | Relapse   |           |           | Differential Clonal Response |                              |                           | TP53, BTG1, NRAS_G13P <sup>+</sup> gain1q21                                                    | TP53, BTG1, NRAS, Q61R <sup>+</sup> gain1q21                                           |                                                                                                    |                                                            |
| 60         | HRD       | Diagnosis | Relapse   |           |           | Differential Clonal Response |                              |                           | NRAS_Q61H(sub), NRAS Q61K (sub-6%), KRAS G12S(sub)                                             | NRAS_Q61H, EGR1, USP7 / gain1q21                                                       |                                                                                                    |                                                            |
| 65         | HRD       | Diagnosis | Relapse   |           |           | Differential Clonal Response |                              |                           | TP53, UBE2G1(sub), IRF4, ZNF292(inDel) / del1p13 <sup>+</sup> , gain1q21                       | NRAS_Q61K / del1p22, gain1q21                                                          |                                                                                                    |                                                            |
| 63         | (8;14)    | Diagnosis | Relapse   |           |           | Differential Clonal Response |                              |                           | KRAS G13D, SP140, HIST1H1B, BHLHE41(inDel, sub) / del1p22, gain1q21                            | KRAS G13D, SP140, HIST1H1B, BHLHE41(inDel, sub), UBR5(sub) / del1p22, amp1q21, del1p13 |                                                                                                    |                                                            |
| 46         | unknown   | Diagnosis | Relapse   |           |           | Differential Clonal Response |                              |                           | / del1p22                                                                                      | DUSP2, FAM66C(inDel), NFKB1(inDel, sub) / del1p22, amp1q21                             |                                                                                                    |                                                            |
| 41         | (1;14)    | Diagnosis | Relapse   |           |           | Differential Clonal Response |                              |                           | FGFR3, EGR1, PRDM1(sub), CDKN1B / gain1q21, del1p22                                            | FGFR3, EGR1, PRDM1(sub), CDKN1B(sub) / gain1q22, del1p22                               |                                                                                                    |                                                            |
| 47         | (1;14)    | Diagnosis | Relapse   |           |           | Differential Clonal Response |                              |                           | NRAS Q61K / del1p22                                                                            | NRAS Q61K, CUL4B(inDel, sub) / del1p22                                                 |                                                                                                    |                                                            |
| 64         | (1;14)    | Diagnosis | Relapse   |           |           | Differential Clonal Response |                              |                           | CYLD, USP7, RB1(inDel), XBP1(inDel, sub), NRAS G12A(sub), CDKN1B (sub) <sup>+</sup> / gain1q21 | CYLD, USP7, RB1(inDel), NRAS G12A / gain1q21                                           | KRAS G13D, CUL4B(inDel, sub), NRAS Q61K(sub) / del1p22                                             |                                                            |
| 15         | HRD       | Diagnosis | Relapse 1 | Relapse 2 |           | Linear evolution             | Differential Clonal Response |                           | NRAS Q61R                                                                                      | NRAS Q61R, UBR5(sub)                                                                   | NRAS Q61R, UBR5(sub)                                                                               |                                                            |
| 18         | HRD       | Diagnosis | Relapse 1 | Relapse 4 |           | Linear evolution             | Differential Clonal Response |                           | KRAS G12A, KLHL6 / amp1q21                                                                     | KRAS G12A, KLHL6, IRF4 / amp1q21, del1p22                                              |                                                                                                    |                                                            |
| 25         | HRD       | Diagnosis | Relapse 2 | Relapse 3 |           | Linear evolution             | Differential Clonal Response |                           |                                                                                                |                                                                                        |                                                                                                    |                                                            |
| 27         | (1;14)    | Diagnosis | Relapse 1 | Relapse 2 |           | Linear evolution             | Differential Clonal Response |                           | BRAF                                                                                           | BRAF                                                                                   |                                                                                                    |                                                            |
| 40         | (1;11;14) | Diagnosis | Relapse   | Relapse   | Relapse   | Linear evolution             | Stable evolution             | Stable evolution          |                                                                                                |                                                                                        |                                                                                                    |                                                            |
| 9          | (1;11;14) | Diagnosis | Relapse 3 |           |           | Linear evolution             |                              |                           | KRAS G12S / gain1q21                                                                           | KRAS G12S / gain1q21                                                                   |                                                                                                    |                                                            |
| 44         | (1;11;14) | Diagnosis | Relapse   |           |           | Linear evolution             |                              |                           | TRAF3, BRAF                                                                                    | TRAF3, BRAF(sub), KRAS Q61L(sub)                                                       |                                                                                                    |                                                            |
| 61         | (1;11;14) | Diagnosis | Relapse   |           |           | Linear evolution             |                              |                           | ARID1A(inDel, sub) / del1p13                                                                   | BRAF(sub), NRAS Y64D(sub) <sup>+</sup> / del1p13                                       |                                                                                                    |                                                            |
| 57         | (1;12;14) | Diagnosis | Relapse   |           |           | Linear evolution             |                              |                           | ACTG1, USP7, DTX1, HST1H1D, ARID1A(inDel, sub) / gain1q21                                      | ACTG1, USP7, DTX1, HST1H1D, RASA2(sub) / gain1q21                                      |                                                                                                    |                                                            |
| 62         | (1;14)    | Diagnosis | Relapse   |           |           | Linear evolution             |                              |                           | / gain1q21, del1p22                                                                            | SAMHD1, SETD2(sub) / gain1q21, del1p22                                                 |                                                                                                    |                                                            |
| 14         | unknown   | Diagnosis | Relapse 1 | Relapse 2 | Relapse 3 | Stable evolution             | Linear evolution             | Stable evolution          | DUSP2, KRAS Q61H, XBP1, TET2 / gain1q21                                                        | DUSP2, KRAS Q61H, XBP1, TET2 / gain1q21                                                | TET2, DUSP2, KRAS Q61H, XBP1, EIF4A3(sub), CDKN1E(sub) <sup>+</sup> , SP140(inDel, sub) / gain1q21 | DUSP2, KRAS Q61H, XBP1, TET2, HUWE1(inDel, sub) / gain1q21 |
| 17         | (1;11;14) | Diagnosis | Relapse 1 |           |           | Stable evolution             |                              |                           | BTG1, KRAS G12V, TP53 / del1p13                                                                | BTG1, KRAS G12V, TP53 / del1p13                                                        |                                                                                                    |                                                            |
| 10         | (1;14)    | Diagnosis | Relapse 1 |           |           | Stable evolution             |                              |                           | DIS3, FGFR3(inDel, sub) / amp1q21, del1p22                                                     | DIS3, FGFR3(inDel, sub), NF1(sub) <sup>+</sup> / amp1q21, del1p22                      |                                                                                                    |                                                            |
| 7          | unknown   | Diagnosis | Relapse 1 |           |           | Stable evolution             |                              |                           | MAF, TCL1A / gain1q21, del1p22, de1p13                                                         | MAF, TCL1A / gain1q21, del1p22, del1p13                                                |                                                                                                    |                                                            |
| 29         | HRD       | Diagnosis | Relapse 1 |           |           | Stable evolution             |                              |                           | KRAS G13D                                                                                      | KRAS G13D                                                                              |                                                                                                    |                                                            |
| 30         | HRD       | Diagnosis | Relapse 1 |           |           | Stable evolution             |                              |                           | NRAS G13R, CYLD(sub)                                                                           | NRAS G13R, CYLD(sub)                                                                   |                                                                                                    |                                                            |
| 45         | (1;11;14) | Diagnosis | Relapse   |           |           | Stable evolution             |                              |                           | KRAS Q61H, DIS3(sub), HST1H1D, RPL5                                                            | KRAS Q61H, DIS3(sub), HST1H1D, RPL5, TP53(sub) <sup>+</sup>                            |                                                                                                    |                                                            |
| 56         | (1;11;14) | Diagnosis | Relapse   |           |           | Stable evolution             |                              |                           | KRAS Q61H, DUSP2, IRF4                                                                         | KRAS Q61H, DUSP2, IRF4, KMT2C(inDel, sub)                                              |                                                                                                    |                                                            |
| 66         | HRD       | Diagnosis | Relapse   |           |           | Stable evolution             |                              |                           | HST1H1E / gain1q21                                                                             | HST1H1E, KRAS Q61L(sub) / amp1q21                                                      |                                                                                                    |                                                            |
| 67         | HRD       | Diagnosis | Relapse   |           |           | Stable evolution             |                              |                           | TRAF3, KRAS(inDel, sub)                                                                        | TRAF3                                                                                  |                                                                                                    |                                                            |
| 59         | (1;14)    | Diagnosis | Relapse   |           |           | Stable evolution             |                              |                           | HST1H1B(inDel)                                                                                 | HST1H1B(inDel)                                                                         |                                                                                                    |                                                            |
| 35         | HRD       | Relapse 1 | Relapse 2 |           |           | Differential Clonal Response |                              |                           | NRAS Q61R(sub), SETX(sub)                                                                      | NRAS Q61R                                                                              |                                                                                                    |                                                            |
| 3          | unknown   | Relapse 1 | Relapse 2 |           |           | Linear evolution             |                              |                           | NRAS G12D, FAM66C(inDel), NCOR1(sub), FUBP1(sub)                                               | NRAS G12D, FAM66C(inDel), NCOR1(sub), FUBP1(sub)                                       |                                                                                                    |                                                            |
| 8          | (1;11;14) | Relapse 1 | Relapse 5 |           |           | Linear evolution             |                              |                           | NRAS Q61R, CCND1, DIS3, PRKD2, ARID1A(sub), USP7(sub), KMT2C(sub)                              | NRAS Q61R, CCND1, DIS3, PRKD2(sub), ARID1A, USP7, KMT2C                                |                                                                                                    |                                                            |
| 34         | HRD       | Relapse 2 | Relapse 3 | Relapse 4 | Relapse 6 | Differential Clonal Response | Differential Clonal Response | Stable evolution          | ATM, FAM66C / gain1q21                                                                         | ATM, FAM66C / gain1q21                                                                 | ATM, FAM66C, CYLD (sub) / gain1q21                                                                 | ATM, FAM66C / gain1q21                                     |
| 36         | HRD       | Relapse 2 | Relapse 5 |           |           | Linear evolution             |                              |                           | NRAS Q61K, FUBP1(sub) / gain1q21                                                               | NRAS Q61K, FUBP1(sub) <sup>+</sup> / amp1q21                                           |                                                                                                    |                                                            |
| 5          | unknown   | Relapse 5 | Relapse 6 |           |           | Differential Clonal Response |                              |                           | KRAS Q22K, SF3B1 / del1p22                                                                     | KRAS Q22K, SF3B1(sub) / del1p22                                                        |                                                                                                    |                                                            |

# mutations/CNAs for all included tumor samples. Mutations included are 80 MM driver genes (Supplementary Table 4), non-italic, and mutations suggested to be involved in IMiD/Proteasome inhibitor drug resistance (REF [29,30,31] in manuscript), in italic. Only non-synonymous SNVs with CCF>5% and indels with VAF >5% are included, categorized to exonic or splicing(sp). SNVs with CCF < 60% or indels with VAF < 30% were classified as subclonal (sub).

\*Found at low frequency (<5% CCF(SNVs)/AF(inDel)) at another sample timepoint.

Red: appearing at progression, or increasing from subclonal to clonal (at least 5x increase), and increase from gain1q to amp1q; Blue: Decreasing (at least 5x) or lost at later stage, or change from an amp1q to a gain1q

included CN aberrations: del1p13(=not affecting TP53 gene), del1p22, gain1q21(=2 copies), amp1q(=4 copies, including OX51B region)

ig-T/HRD: cytogenetic subgroup, see Supplementary Table S12.
