# Supplementary material for: Clonal evolution after treatment pressure in multiple myeloma: heterogenous genomic aberrations and transcriptomic convergence
Source: PubMed Central journal article supplement (PMC9252918; doi:10.1038/s41375-022-01597-y), 2022-05-28
Supplement: 41375_2022_1597_MOESM12_ESM.pdf [file 41375_2022_1597_MOESM12_ESM.pdf]

| Index | Code     | Company  | Address      | City     | State | Zip   | Phone        | Fax          | Website     | Year | Revenue | Assets   | Employees | Rating |
|-------|----------|----------|--------------|----------|-------|-------|--------------|--------------|-------------|------|---------|----------|-----------|--------|
| 1     | 00000001 | ABC Corp | 123 Main St  | New York | NY    | 10001 | 212-555-1234 | 212-555-5678 | www.abc.com | 2000 | 1000000 | 5000000  | 100       | A      |
| 2     | 00000002 | DEF Inc  | 456 Park Ave | New York | NY    | 10017 | 212-555-9876 | 212-555-4321 | www.def.com | 2001 | 2000000 | 10000000 | 200       | B+     |
| 3     | 00000003 | GHI LLC  | 789 Broadway | New York | NY    | 10013 | 212-555-2345 | 212-555-6789 | www.ghi.com | 2002 | 500000  | 2000000  | 50        | B-     |
| 4     | 00000004 | JKL Corp | 321 West St  | New York | NY    | 10014 | 212-555-3456 | 212-555-7890 | www.jkl.com | 2003 | 1500000 | 7000000  | 150       | B      |
| 5     | 00000005 | MNO Inc  | 654 South St | New York | NY    | 10016 | 212-555-4567 | 212-555-8901 | www.mno.com | 2004 | 3000000 | 15000000 | 300       | B+     |
| 6     | 00000006 | PQR LLC  | 987 North St | New York | NY    | 10015 | 212-555-5678 | 212-555-9012 | www.pqr.com | 2005 | 700000  | 3000000  | 70        | B-     |
| 7     | 00000007 | STU Corp | 210 East St  | New York | NY    | 10002 | 212-555-6789 | 212-555-0123 | www.stu.com | 2006 | 1200000 | 6000000  | 120       | B      |
| 8     | 00000008 | VWX Inc  | 543 West St  | New York | NY    | 10014 | 212-555-7890 | 212-555-1234 | www.vwx.com | 2007 | 2500000 | 12000000 | 250       | B+     |
| 9     | 00000009 | YZA LLC  | 876 South St | New York | NY    | 10016 | 212-555-8901 | 212-555-2345 | www.yza.com | 2008 | 600000  | 2500000  | 60        | B-     |
| 10    | 00000010 | BCD Corp | 109 North St | New York | NY    | 10015 | 212-555-9012 | 212-555-3456 | www.bcd.com | 2009 | 1800000 | 9000000  | 180       | B      |
| 11    | 00000011 | EFG Inc  | 432 East St  | New York | NY    | 10002 | 212-555-0123 | 212-555-4567 | www.efg.com | 2010 | 3500000 | 18000000 | 350       | B+     |
| 12    | 00000012 | HIJ LLC  | 765 West St  | New York | NY    | 10014 | 212-555-1234 | 212-555-5678 | www.hij.com | 2011 | 900000  | 3500000  | 90        | B-     |
| 13    | 00000013 | KLM Corp | 098 South St | New York | NY    | 10016 | 212-555-2345 | 212-555-6789 | www.klm.com | 2012 | 1600000 | 8000000  | 160       | B      |
| 14    | 00000014 | NOP Inc  | 321 North St | New York | NY    | 10015 | 212-555-3456 | 212-555-7890 | www.nop.com | 2013 | 2800000 | 14000000 | 280       | B+     |
| 15    | 00000015 | QRS LLC  | 654 East St  | New York | NY    | 10002 | 212-555-4567 | 212-555-8901 | www.qrs.com | 2014 | 750000  | 3000000  | 75        | B-     |
| 16    | 00000016 | TUV Corp | 987 West St  | New York | NY    | 10014 | 212-555-5678 | 212-555-9012 | www.tuv.com | 2015 | 1900000 | 9500000  | 190       | B      |
| 17    | 00000017 | WXY Inc  | 210 South St | New York | NY    | 10016 | 212-555-6789 | 212-555-0123 | www.wxy.com | 2016 | 3200000 | 16000000 | 320       | B+     |
| 18    | 00000018 | ZAB LLC  | 543 North St | New York | NY    | 10015 | 212-555-7890 | 212-555-1234 | www.zab.com | 2017 | 850000  | 3200000  | 85        | B-     |
| 19    | 00000019 | CCD Corp | 876 East St  | New York | NY    | 10002 | 212-555-8901 | 212-555-2345 | www.ccd.com | 2018 | 1700000 | 8500000  | 170       | B      |
| 20    | 00000020 | EEF Inc  | 109 West St  | New York | NY    | 10014 | 212-555-9012 | 212-555-3456 | www.eef.com | 2019 | 2900000 | 14500000 | 290       | B+     |
| 21    | 00000021 | GGH LLC  | 432 South St | New York | NY    | 10016 | 212-555-0123 | 212-555-4567 | www.ghh.com | 2020 | 700000  | 2800000  | 70        | B-     |
| 22    | 00000022 | IIJ Corp | 765 North St | New York | NY    | 10015 | 212-555-1234 | 212-555-5678 | www.ijj.com | 2021 | 1800000 | 9000000  | 180       | B      |
| 23    | 00000023 | KKL Inc  | 098 East St  | New York | NY    | 10002 | 212-555-2345 | 212-555-6789 | www.kkl.com | 2022 | 3100000 | 15500000 | 310       | B+     |
| 24    | 00000024 | LLM LLC  | 321 West St  | New York | NY    | 10014 | 212-555-3456 | 212-555-7890 | www.llm.com | 2023 | 800000  | 3100000  | 80        | B-     |
| 25    | 00000025 | NNP Corp | 654 South St | New York | NY    | 10016 | 212-555-4567 | 212-555-8901 | www.nnp.com | 2024 | 1900000 | 9500000  | 190       | B      |
| 26    | 00000026 | OOQ Inc  | 987 North St | New York | NY    | 10015 | 212-555-5678 | 212-555-9012 | www.oqq.com | 2025 | 2700000 | 13500000 | 270       | B+     |
| 27    | 00000027 | PPR LLC  | 210 East St  | New York | NY    | 10002 | 212-555-6789 | 212-555-0123 | www.ppr.com | 2026 | 750000  | 2900000  | 75        | B-     |
| 28    | 00000028 | RRS Corp | 543 West St  | New York | NY    | 10014 | 212-555-7890 | 212-555-1234 | www.rrs.com | 2027 | 1800000 | 9000000  | 180       | B      |
| 29    | 00000029 | TTU Inc  | 876 South St | New York | NY    | 10016 | 212-555-8901 | 212-555-2345 | www.ttu.com | 2028 | 3000000 | 15000000 | 300       | B+     |
| 30    | 00000030 | VVV LLC  | 109 North St | New York | NY    | 10015 | 212-555-9012 | 212-555-3456 | www.vvv.com | 2029 | 900000  | 3400000  | 90        | B-     |
| 31    | 00000031 | WWW Corp | 432 East St  | New York | NY    | 10002 | 212-555-0123 | 212-555-4567 | www.www.com | 2030 | 1700000 | 8500000  | 170       | B      |
| 32    | 00000032 | XXX Inc  | 765 West St  | New York | NY    | 10014 | 212-555-1234 | 212-555-5678 | www.xxx.com | 2031 | 2800000 | 14000000 | 280       | B+     |
| 33    | 00000033 | YYY LLC  | 098 South St | New York | NY    | 10016 | 212-555-2345 | 212-555-6789 | www.yyy.com | 2032 | 700000  | 2800000  | 70        | B-     |
| 34    | 00000034 | ZZZ Corp | 321 North St | New York | NY    | 10015 | 212-555-3456 | 212-555-7890 | www.zzz.com | 2033 | 1900000 | 9500000  | 190       | B      |
| 35    | 00000035 | AAA Inc  | 654 East St  | New York | NY    | 10002 | 212-555-4567 | 212-555-8901 | www.aaa.com | 2034 | 3200000 | 16000000 | 320       | B+     |
| 36    | 00000036 | BBB LLC  | 987 West St  | New York | NY    | 10014 | 212-555-5678 | 212-555-9012 | www.bbb.com | 2035 | 850000  | 3200000  | 85        | B-     |
| 37    | 00000037 | CCC Corp | 210 South St | New York | NY    | 10016 | 212-555-6789 | 212-555-0123 | www.ccc.com | 2036 | 1800000 | 9000000  | 180       | B      |
| 38    | 00000038 | DDD Inc  | 543 North St | New York | NY    | 10015 | 212-555-7890 | 212-555-1234 | www.ddd.com | 2037 | 2900000 | 14500000 | 290       | B+     |
| 39    | 00000039 | EEE LLC  | 876 East St  | New York | NY    | 10002 | 212-555-8901 | 212-555-2345 | www.eee.com | 2038 | 750000  | 2900000  | 75        | B-     |
| 40    | 00000040 | FFF Corp | 109 West St  | New York | NY    | 10014 | 212-555-9012 | 212-555-3456 | www.fff.com | 2039 | 1900000 | 9500000  | 190       | B      |
| 41    | 00000041 | GGG Inc  | 432 South St | New York | NY    | 10016 | 212-555-0123 | 212-555-4567 | www.ggg.com | 2040 | 3100000 | 15500000 | 310       | B+     |
| 42    | 00000042 | HHH LLC  | 765 North St | New York | NY    | 10015 | 212-555-1234 | 212-555-5678 | www.hhh.com | 2041 | 800000  | 3100000  | 80        | B-     |
| 43    | 00000043 | III Corp | 098 East St  | New York | NY    | 10002 | 212-555-2345 | 212-555-6789 | www.iii.com | 2042 | 1800000 | 9000000  | 180       | B      |
| 44    | 00000044 | JJJ Inc  | 321 West St  | New York | NY    | 10014 | 212-555-3456 | 212-555-7890 | www.jjj.com | 2043 | 2700000 | 13500000 | 270       | B+     |
| 45    | 00000045 | KKK LLC  | 654 South St | New York | NY    | 10016 | 212-555-4567 | 212-555-8901 | www.kkk.com | 2044 | 700000  | 2800000  | 70        | B-     |
| 46    | 00000046 | LLL Corp | 987 North St | New York | NY    | 10015 | 212-555-5678 | 212-555-9012 | www.lll.com | 2045 | 1900000 | 9500000  | 190       | B      |
| 47    | 00000047 | MMM Inc  | 210 East St  | New York | NY    | 10002 | 212-555-6789 | 212-555-0123 | www.mmm.com | 2046 | 3000000 | 15000000 | 300       | B+     |
| 48    | 00000048 | NNN LLC  | 543 West St  | New York | NY    | 10014 | 212-555-7890 | 212-555-1234 | www.nnn.com | 2047 | 850000  | 3200000  | 85        | B-     |
| 49    | 00000049 | OOO Corp | 876 South St | New York | NY    | 10016 | 212-555-8901 | 212-555-2345 | www.ooo.com | 2048 | 1800000 | 9000000  | 180       | B      |
| 50    | 00000050 | PPP Inc  | 109 North St | New York | NY    | 10015 | 212-555-9012 | 212-555-3456 | www.ppp.com | 2049 | 2800000 | 14000000 | 280       | B+     |
| 51    | 00000051 | QQQ LLC  | 432 East St  | New York | NY    | 10002 | 212-555-0123 | 212-555-4567 | www.qqq.com | 2050 | 700000  | 2800000  | 70        | B-     |
| 52    | 00000052 | RRR Corp | 765 West St  | New York | NY    | 10014 | 212-555-1234 | 212-555-5678 | www.rrr.com | 2051 | 1900000 | 9500000  | 190       | B      |
| 53    | 00000053 | SSS Inc  | 098 South St | New York | NY    | 10016 | 212-555-2345 | 212-555-6789 | www.sss.com | 2052 | 3100000 | 15500000 | 310       | B+     |
| 54    | 00000054 | TTT LLC  | 321 North St | New York | NY    | 10015 | 212-555-3456 | 212-555-7890 | www.ttt.com | 2053 | 800000  | 3100000  | 80        | B-     |
| 55    | 00000055 | UUU Corp | 654 East St  | New York | NY    | 10002 | 212-555-4567 | 212-555-8901 | www.uuu.com | 2054 | 1800000 | 9000000  | 180       | B      |
| 56    | 00000056 | VVV Inc  | 987 West St  | New York | NY    | 10014 | 212-555-5678 | 212-555-9012 | www.vvv.com | 2055 | 2900000 | 14500000 | 290       | B+     |
| 57    | 00000057 | WWW LLC  | 210 South St | New York | NY    | 10016 | 212-555-6789 | 212-555-0123 | www.www.com | 2056 | 750000  | 2900000  | 75        | B-     |
| 58    | 00000058 | XXX Corp | 543 North St | New York | NY    | 10015 | 212-555-7890 | 212-555-1234 | www.xxx.com | 2057 | 1900000 | 9500000  | 190       | B      |
| 59    | 00000059 | YYY Inc  | 876 East St  | New York | NY    | 10002 | 212-555-8901 | 212-555-2345 | www.yyy.com | 2058 | 3000000 | 15000000 | 300       | B+     |
| 60    | 00000060 | ZZZ LLC  | 109 West St  | New York | NY    | 10014 | 212-555-9012 | 212-555-3456 | www.zzz.com | 2059 | 850000  | 3200000  | 85        | B-     |
| 61    | 00000061 | AAA Corp | 432 South St | New York | NY    | 10016 | 212-555-0123 | 212-555-4567 | www.aaa.com | 2060 | 1800000 | 9000000  | 180       | B      |
| 62    | 00000062 | BBB Inc  | 765 North St | New York | NY    | 10015 | 212-555-1234 | 212-555-5678 | www.bbb.com | 2061 | 2800000 | 14000000 | 280       | B+     |
| 63    | 00000063 | CCC LLC  | 098 East St  | New York | NY    | 10002 | 212-555-2345 | 212-555-6789 | www.ccc.com | 2062 | 700000  | 2800000  | 70        | B-     |
| 64    | 00000064 | DDD Corp | 321 West St  | New York | NY    | 10014 | 212-555-3456 | 212-555-7890 | www.ddd.com | 2063 | 1900000 | 9500000  | 190       | B      |
| 65    | 00000065 | EEE Inc  | 654 South St | New York | NY    | 10016 | 212-555-4567 | 212-555-8901 | www.eee.com | 2064 | 3100000 | 15500000 | 310       | B+     |
| 66    | 00000066 | FFF LLC  | 987 North St | New York | NY    | 10015 | 212-555-5678 | 212-555-9012 | www.fff.com | 2065 | 800000  | 3100000  | 80        | B-     |
| 67    | 00000067 | GGG Corp | 210 East St  | New York | NY    | 10002 | 212-555-6789 | 212-555-0123 | www.ggg.com | 2066 | 1800000 | 9000000  | 180       | B      |
| 68    | 00000068 | HHH Inc  | 543 West St  | New York | NY    | 10014 | 212-555-7890 | 212-555-1234 | www.hhh.com | 2067 | 2900000 | 14500000 | 290       | B+     |
| 69    | 00000069 | III LLC  | 876 South St | New York | NY    | 10016 | 212-555-8901 | 212-555-2345 | www.iii.com | 2068 | 750000  | 2900000  | 75        | B-     |
| 70    | 00000070 | JJJ Corp | 109 North St | New York | NY    | 10015 | 212-555-9012 | 212-555-3456 | www.jjj.com | 2069 | 1900000 | 9500000  | 190       | B      |
| 71    | 00000071 | KKK Inc  | 432 East St  | New York | NY    | 10002 | 212-555-0123 | 212-555-4567 | www.kkk.com | 2070 | 3000000 | 15000000 | 300       | B+     |
| 72    | 00000072 | LLL LLC  | 765 West St  | New York | NY    | 10014 | 212-555-1234 | 212-555-5678 | www.lll.com | 2071 | 850000  | 3200000  | 85        |        |



| Index | Code     | Company Name | Address        | City          | State | Zip   | Phone        | Fax          | Website     | Year | Revenue  | Assets   | Liabilities | Equity   | Employees | Industry           | Notes |
|-------|----------|--------------|----------------|---------------|-------|-------|--------------|--------------|-------------|------|----------|----------|-------------|----------|-----------|--------------------|-------|
| 1     | 00000001 | ABC COMPANY  | 123 MAIN ST    | NEW YORK      | NY    | 10001 | 212-555-1234 | 212-555-5678 | www.abc.com | 2000 | 1000000  | 500000   | 300000      | 200000   | 50        | Manufacturing      |       |
| 2     | 00000002 | DEF COMPANY  | 456 PINE ST    | LOS ANGELES   | CA    | 90001 | 213-555-9876 | 213-555-4321 | www.def.com | 2001 | 2000000  | 1000000  | 600000      | 400000   | 100       | Retail             |       |
| 3     | 00000003 | GHI COMPANY  | 789 OAK ST     | CHICAGO       | IL    | 60601 | 312-555-2345 | 312-555-6789 | www.ghi.com | 2002 | 3000000  | 1500000  | 800000      | 700000   | 150       | Technology         |       |
| 4     | 00000004 | JKL COMPANY  | 101 BIRCH ST   | HOUSTON       | TX    | 77001 | 281-555-3456 | 281-555-7890 | www.jkl.com | 2003 | 4000000  | 2000000  | 1000000     | 1000000  | 200       | Healthcare         |       |
| 5     | 00000005 | MNO COMPANY  | 202 CEDAR ST   | PHOENIX       | AZ    | 85001 | 602-555-4567 | 602-555-8901 | www.mno.com | 2004 | 5000000  | 2500000  | 1200000     | 1300000  | 250       | Finance            |       |
| 6     | 00000006 | PQR COMPANY  | 303 ELM ST     | ATLANTA       | GA    | 30301 | 404-555-5678 | 404-555-9012 | www.pqr.com | 2005 | 6000000  | 3000000  | 1500000     | 1500000  | 300       | Energy             |       |
| 7     | 00000007 | STU COMPANY  | 404 MAPLE ST   | DALLAS        | TX    | 75201 | 214-555-6789 | 214-555-0123 | www.stu.com | 2006 | 7000000  | 3500000  | 1800000     | 1700000  | 350       | Transportation     |       |
| 8     | 00000008 | VWX COMPANY  | 505 WALNUT ST  | SEATTLE       | WA    | 98101 | 206-555-7890 | 206-555-1234 | www.vwx.com | 2007 | 8000000  | 4000000  | 2000000     | 2000000  | 400       | Telecommunications |       |
| 9     | 00000009 | YZA COMPANY  | 606 PINE ST    | PORTLAND      | OR    | 97201 | 503-555-8901 | 503-555-2345 | www.yza.com | 2008 | 9000000  | 4500000  | 2200000     | 2300000  | 450       | Food & Beverage    |       |
| 10    | 00000010 | BCD COMPANY  | 707 OAK ST     | SAN ANTONIO   | TX    | 78201 | 210-555-9012 | 210-555-3456 | www.bcd.com | 2009 | 10000000 | 5000000  | 2500000     | 2500000  | 500       | Construction       |       |
| 11    | 00000011 | EFG COMPANY  | 808 BIRCH ST   | INDIANAPOLIS  | IN    | 46201 | 317-555-0123 | 317-555-4567 | www.efg.com | 2010 | 11000000 | 5500000  | 2800000     | 2700000  | 550       | Automotive         |       |
| 12    | 00000012 | HIJ COMPANY  | 909 CEDAR ST   | COLUMBIANA    | SC    | 29201 | 803-555-1234 | 803-555-5678 | www.hij.com | 2011 | 12000000 | 6000000  | 3000000     | 3000000  | 600       | Chemical           |       |
| 13    | 00000013 | OPQ COMPANY  | 1010 ELM ST    | MEMPHIS       | TN    | 38101 | 901-555-2345 | 901-555-6789 | www.opq.com | 2012 | 13000000 | 6500000  | 3200000     | 3300000  | 650       | Media              |       |
| 14    | 00000014 | RST COMPANY  | 1111 MAPLE ST  | DES MOINES    | IA    | 50301 | 515-555-3456 | 515-555-7890 | www.rst.com | 2013 | 14000000 | 7000000  | 3500000     | 3500000  | 700       | Insurance          |       |
| 15    | 00000015 | UVW COMPANY  | 1212 WALNUT ST | OKLAHOMA CITY | OK    | 73101 | 405-555-4567 | 405-555-8901 | www.uvw.com | 2014 | 15000000 | 7500000  | 3800000     | 3700000  | 750       | Real Estate        |       |
| 16    | 00000016 | XYZ COMPANY  | 1313 PINE ST   | TOPEKA        | KS    | 66601 | 785-555-5678 | 785-555-9012 | www.xyz.com | 2015 | 16000000 | 8000000  | 4000000     | 4000000  | 800       | Education          |       |
| 17    | 00000017 | ABC COMPANY  | 1414 OAK ST    | WICHITA       | KS    | 67201 | 316-555-6789 | 316-555-0123 | www.abc.com | 2016 | 17000000 | 8500000  | 4200000     | 4300000  | 850       | Government         |       |
| 18    | 00000018 | DEF COMPANY  | 1515 BIRCH ST  | OMAHA         | NE    | 68101 | 402-555-7890 | 402-555-1234 | www.def.com | 2017 | 18000000 | 9000000  | 4500000     | 4500000  | 900       | Utilities          |       |
| 19    | 00000019 | GHI COMPANY  | 1616 CEDAR ST  | LINCOLN       | NE    | 68501 | 402-555-8901 | 402-555-2345 | www.ghi.com | 2018 | 19000000 | 9500000  | 4800000     | 4700000  | 950       | Transportation     |       |
| 20    | 00000020 | JKL COMPANY  | 1717 ELM ST    | DES MOINES    | IA    | 50301 | 515-555-9012 | 515-555-3456 | www.jkl.com | 2019 | 20000000 | 10000000 | 5000000     | 5000000  | 1000      | Healthcare         |       |
| 21    | 00000021 | MNO COMPANY  | 1818 MAPLE ST  | DES MOINES    | IA    | 50301 | 515-555-0123 | 515-555-4567 | www.mno.com | 2020 | 21000000 | 10500000 | 5200000     | 5300000  | 1050      | Healthcare         |       |
| 22    | 00000022 | PQR COMPANY  | 1919 WALNUT ST | DES MOINES    | IA    | 50301 | 515-555-1234 | 515-555-5678 | www.pqr.com | 2021 | 22000000 | 11000000 | 5500000     | 5500000  | 1100      | Healthcare         |       |
| 23    | 00000023 | STU COMPANY  | 2020 PINE ST   | DES MOINES    | IA    | 50301 | 515-555-2345 | 515-555-6789 | www.stu.com | 2022 | 23000000 | 11500000 | 5800000     | 5700000  | 1150      | Healthcare         |       |
| 24    | 00000024 | VWX COMPANY  | 2121 OAK ST    | DES MOINES    | IA    | 50301 | 515-555-3456 | 515-555-7890 | www.vwx.com | 2023 | 24000000 | 12000000 | 6000000     | 6000000  | 1200      | Healthcare         |       |
| 25    | 00000025 | YZA COMPANY  | 2222 BIRCH ST  | DES MOINES    | IA    | 50301 | 515-555-4567 | 515-555-8901 | www.yza.com | 2024 | 25000000 | 12500000 | 6200000     | 6300000  | 1250      | Healthcare         |       |
| 26    | 00000026 | BCD COMPANY  | 2323 CEDAR ST  | DES MOINES    | IA    | 50301 | 515-555-5678 | 515-555-9012 | www.bcd.com | 2025 | 26000000 | 13000000 | 6500000     | 6500000  | 1300      | Healthcare         |       |
| 27    | 00000027 | EFG COMPANY  | 2424 ELM ST    | DES MOINES    | IA    | 50301 | 515-555-6789 | 515-555-0123 | www.efg.com | 2026 | 27000000 | 13500000 | 6800000     | 6700000  | 1350      | Healthcare         |       |
| 28    | 00000028 | HIJ COMPANY  | 2525 MAPLE ST  | DES MOINES    | IA    | 50301 | 515-555-7890 | 515-555-1234 | www.hij.com | 2027 | 28000000 | 14000000 | 7000000     | 7000000  | 1400      | Healthcare         |       |
| 29    | 00000029 | OPQ COMPANY  | 2626 WALNUT ST | DES MOINES    | IA    | 50301 | 515-555-8901 | 515-555-2345 | www.opq.com | 2028 | 29000000 | 14500000 | 7200000     | 7300000  | 1450      | Healthcare         |       |
| 30    | 00000030 | RST COMPANY  | 2727 PINE ST   | DES MOINES    | IA    | 50301 | 515-555-9012 | 515-555-3456 | www.rst.com | 2029 | 30000000 | 15000000 | 7500000     | 7500000  | 1500      | Healthcare         |       |
| 31    | 00000031 | UVW COMPANY  | 2828 OAK ST    | DES MOINES    | IA    | 50301 | 515-555-0123 | 515-555-4567 | www.uvw.com | 2030 | 31000000 | 15500000 | 7800000     | 7700000  | 1550      | Healthcare         |       |
| 32    | 00000032 | XYZ COMPANY  | 2929 BIRCH ST  | DES MOINES    | IA    | 50301 | 515-555-1234 | 515-555-5678 | www.xyz.com | 2031 | 32000000 | 16000000 | 8000000     | 8000000  | 1600      | Healthcare         |       |
| 33    | 00000033 | ABC COMPANY  | 3030 CEDAR ST  | DES MOINES    | IA    | 50301 | 515-555-2345 | 515-555-6789 | www.abc.com | 2032 | 33000000 | 16500000 | 8200000     | 8300000  | 1650      | Healthcare         |       |
| 34    | 00000034 | DEF COMPANY  | 3131 ELM ST    | DES MOINES    | IA    | 50301 | 515-555-3456 | 515-555-7890 | www.def.com | 2033 | 34000000 | 17000000 | 8500000     | 8500000  | 1700      | Healthcare         |       |
| 35    | 00000035 | GHI COMPANY  | 3232 MAPLE ST  | DES MOINES    | IA    | 50301 | 515-555-4567 | 515-555-8901 | www.ghi.com | 2034 | 35000000 | 17500000 | 8800000     | 8700000  | 1750      | Healthcare         |       |
| 36    | 00000036 | JKL COMPANY  | 3333 WALNUT ST | DES MOINES    | IA    | 50301 | 515-555-5678 | 515-555-9012 | www.jkl.com | 2035 | 36000000 | 18000000 | 9000000     | 9000000  | 1800      | Healthcare         |       |
| 37    | 00000037 | MNO COMPANY  | 3434 PINE ST   | DES MOINES    | IA    | 50301 | 515-555-6789 | 515-555-0123 | www.mno.com | 2036 | 37000000 | 18500000 | 9200000     | 9300000  | 1850      | Healthcare         |       |
| 38    | 00000038 | PQR COMPANY  | 3535 OAK ST    | DES MOINES    | IA    | 50301 | 515-555-7890 | 515-555-1234 | www.pqr.com | 2037 | 38000000 | 19000000 | 9500000     | 9500000  | 1900      | Healthcare         |       |
| 39    | 00000039 | STU COMPANY  | 3636 BIRCH ST  | DES MOINES    | IA    | 50301 | 515-555-8901 | 515-555-2345 | www.stu.com | 2038 | 39000000 | 19500000 | 9800000     | 9700000  | 1950      | Healthcare         |       |
| 40    | 00000040 | VWX COMPANY  | 3737 CEDAR ST  | DES MOINES    | IA    | 50301 | 515-555-9012 | 515-555-3456 | www.vwx.com | 2039 | 40000000 | 20000000 | 10000000    | 10000000 | 2000      | Healthcare         |       |
| 41    | 00000041 | YZA COMPANY  | 3838 ELM ST    | DES MOINES    | IA    | 50301 | 515-555-0123 | 515-555-4567 | www.yza.com | 2040 | 41000000 | 20500000 | 10200000    | 10300000 | 2050      | Healthcare         |       |
| 42    | 00000042 | BCD COMPANY  | 3939 MAPLE ST  | DES MOINES    | IA    | 50301 | 515-555-1234 | 515-555-5678 | www.bcd.com | 2041 | 42000000 | 21000000 | 10500000    | 10500000 | 2100      | Healthcare         |       |
| 43    | 00000043 | EFG COMPANY  | 4040 WALNUT ST | DES MOINES    | IA    | 50301 | 515-555-2345 | 515-555-6789 | www.efg.com | 2042 | 43000000 | 21500000 | 10800000    | 10700000 | 2150      | Healthcare         |       |
| 44    | 00000044 | HIJ COMPANY  | 4141 PINE ST   | DES MOINES    | IA    | 50301 | 515-555-3456 | 515-555-7890 | www.hij.com | 2043 | 44000000 | 22000000 | 11000000    | 11000000 | 2200      | Healthcare         |       |
| 45    | 00000045 | OPQ COMPANY  | 4242 OAK ST    | DES MOINES    | IA    | 50301 | 515-555-4567 | 515-555-8901 | www.opq.com | 2044 | 45000000 | 22500000 | 11200000    | 11300000 | 2250      | Healthcare         |       |
| 46    | 00000046 | RST COMPANY  | 4343 BIRCH ST  | DES MOINES    | IA    | 50301 | 515-555-5678 | 515-555-9012 | www.rst.com | 2045 | 46000000 | 23000000 | 11500000    | 11500000 | 2300      | Healthcare         |       |
| 47    | 00000047 | UVW COMPANY  | 4444 CEDAR ST  | DES MOINES    | IA    | 50301 | 515-555-6789 | 515-555-0123 | www.uvw.com | 2046 | 47000000 | 23500000 | 11800000    | 11700000 | 2350      | Healthcare         |       |
| 48    | 00000048 | XYZ COMPANY  | 4545 ELM ST    | DES MOINES    | IA    | 50301 | 515-555-7890 | 515-555-1234 | www.xyz.com | 2047 | 48000000 | 24000000 | 12000000    | 12000000 | 2400      | Healthcare         |       |
| 49    | 00000049 | ABC COMPANY  | 4646 MAPLE ST  | DES MOINES    | IA    | 50301 | 515-555-8901 | 515-555-2345 | www.abc.com | 2048 | 49000000 | 24500000 | 12200000    | 12300000 | 2450      | Healthcare         |       |
| 50    | 00000050 | DEF COMPANY  | 4747 WALNUT ST | DES MOINES    | IA    | 50301 | 515-555-9012 | 515-555-3456 | www.def.com | 2049 | 50000000 | 25000000 | 12500000    | 12500000 | 2500      | Healthcare         |       |
| 51    | 00000051 | GHI COMPANY  | 4848 PINE ST   | DES MOINES    | IA    | 50301 | 515-555-0123 | 515-555-4567 | www.ghi.com | 2050 | 51000000 | 25500000 | 12800000    | 12700000 | 2550      | Healthcare         |       |
| 52    | 00000052 | JKL COMPANY  | 4949 OAK ST    | DES MOINES    | IA    | 50301 | 515-555-1234 | 515-555-5678 | www.jkl.com | 2051 | 52000000 | 26000000 | 13000000    | 13000000 | 2600      | Healthcare         |       |
| 53    | 00000053 | MNO COMPANY  | 5050 BIRCH ST  | DES MOINES    | IA    | 50301 | 515-555-2345 | 515-555-6789 | www.mno.com | 2052 | 53000000 | 26500000 | 13200000    | 13300000 | 2650      | Healthcare         |       |
| 54    | 00000054 | PQR COMPANY  | 5151 CEDAR ST  | DES MOINES    | IA    | 50301 | 515-555-3456 | 515-555-7890 | www.pqr.com | 2053 | 54000000 | 27000000 | 13500000    | 13500000 | 2700      | Healthcare         |       |
| 55    | 00000055 | STU COMPANY  | 5252 ELM ST    | DES MOINES    | IA    | 50301 | 515-555-4567 | 515-555-8901 | www.stu.com | 2054 | 55000000 | 27500000 | 13800000    | 13700000 | 2750      | Healthcare         |       |
| 56    | 00000056 | VWX COMPANY  | 5353 MAPLE ST  | DES MOINES    | IA    | 50301 | 515-555-5678 | 515-555-9012 | www.vwx.com | 2055 | 56000000 | 28000000 | 14000000    | 14000000 | 2800      | Healthcare         |       |
| 57    | 00000057 | YZA COMPANY  | 5454 WALNUT ST | DES MOINES    | IA    | 50301 | 515-555-6789 | 515-555-0123 | www.yza.com | 2056 | 57000000 | 28500000 | 14200000    | 14300000 | 2850      | Healthcare         |       |
| 58    | 00000058 | BCD COMPANY  | 5555 PINE ST   | DES MOINES    | IA    | 50301 | 515-555-7890 | 515-555-1234 | www.bcd.com | 2057 | 58000000 | 29000000 | 14500000    | 14500000 | 2900      | Healthcare         |       |
| 59    | 00000059 | EFG COMPANY  |                |               |       |       |              |              |             |      |          |          |             |          |           |                    |       |

| Index | Code   | Company  | Address      | City     | State | Zip   | Phone        | Fax          | Website     | Year | Revenue  | Assets  | Liabilities | Equity  | Employees | Industry           |
|-------|--------|----------|--------------|----------|-------|-------|--------------|--------------|-------------|------|----------|---------|-------------|---------|-----------|--------------------|
| 10001 | 000001 | ABC Corp | 123 Main St  | New York | NY    | 10001 | 212-555-1234 | 212-555-5678 | www.abc.com | 2000 | 1000000  | 500000  | 300000      | 200000  | 100       | Manufacturing      |
| 10002 | 000002 | DEF Inc  | 456 Park Ave | New York | NY    | 10017 | 212-555-9876 | 212-555-4321 | www.def.com | 2001 | 2000000  | 1000000 | 600000      | 800000  | 200       | Technology         |
| 10003 | 000003 | GHI LLC  | 789 Broadway | New York | NY    | 10013 | 212-555-2345 | 212-555-6789 | www.ghi.com | 2002 | 500000   | 250000  | 150000      | 100000  | 50        | Retail             |
| 10004 | 000004 | JKL Corp | 321 West St  | New York | NY    | 10014 | 212-555-3456 | 212-555-7890 | www.jkl.com | 2003 | 3000000  | 1500000 | 900000      | 1200000 | 300       | Finance            |
| 10005 | 000005 | MNO Inc  | 654 South St | New York | NY    | 10016 | 212-555-4567 | 212-555-8901 | www.mno.com | 2004 | 700000   | 350000  | 200000      | 150000  | 75        | Healthcare         |
| 10006 | 000006 | PQR LLC  | 987 North St | New York | NY    | 10018 | 212-555-5678 | 212-555-9012 | www.pqr.com | 2005 | 1500000  | 750000  | 450000      | 300000  | 150       | Energy             |
| 10007 | 000007 | STU Corp | 210 East St  | New York | NY    | 10002 | 212-555-6789 | 212-555-0123 | www.stu.com | 2006 | 400000   | 200000  | 120000      | 80000   | 40        | Transportation     |
| 10008 | 000008 | VWX Inc  | 543 West St  | New York | NY    | 10014 | 212-555-7890 | 212-555-1234 | www.vwx.com | 2007 | 600000   | 300000  | 180000      | 120000  | 60        | Construction       |
| 10009 | 000009 | YZA LLC  | 876 South St | New York | NY    | 10016 | 212-555-8901 | 212-555-2345 | www.yza.com | 2008 | 900000   | 450000  | 250000      | 150000  | 90        | Education          |
| 10010 | 000010 | BCD Corp | 109 North St | New York | NY    | 10003 | 212-555-9012 | 212-555-3456 | www.bcd.com | 2009 | 1200000  | 600000  | 350000      | 250000  | 120       | Telecommunications |
| 10011 | 000011 | EFG Inc  | 432 East St  | New York | NY    | 10002 | 212-555-0123 | 212-555-4567 | www.efg.com | 2010 | 800000   | 400000  | 220000      | 150000  | 80        | Real Estate        |
| 10012 | 000012 | HIJ LLC  | 765 West St  | New York | NY    | 10014 | 212-555-1234 | 212-555-5678 | www.hij.com | 2011 | 1100000  | 550000  | 300000      | 200000  | 110       | Media              |
| 10013 | 000013 | KLM Corp | 098 South St | New York | NY    | 10016 | 212-555-2345 | 212-555-6789 | www.klm.com | 2012 | 1300000  | 650000  | 380000      | 270000  | 130       | Food & Beverage    |
| 10014 | 000014 | NOP Inc  | 321 North St | New York | NY    | 10003 | 212-555-3456 | 212-555-7890 | www.nop.com | 2013 | 1600000  | 800000  | 450000      | 300000  | 160       | Automotive         |
| 10015 | 000015 | QRS LLC  | 654 East St  | New York | NY    | 10002 | 212-555-4567 | 212-555-8901 | www.qrs.com | 2014 | 1900000  | 950000  | 520000      | 430000  | 190       | Chemicals          |
| 10016 | 000016 | TUV Corp | 987 West St  | New York | NY    | 10014 | 212-555-5678 | 212-555-9012 | www.tuv.com | 2015 | 2200000  | 1100000 | 600000      | 500000  | 220       | Pharmaceuticals    |
| 10017 | 000017 | WXY Inc  | 210 South St | New York | NY    | 10016 | 212-555-6789 | 212-555-0123 | www.wxy.com | 2016 | 2500000  | 1250000 | 700000      | 600000  | 250       | Insurance          |
| 10018 | 000018 | ZAB LLC  | 543 North St | New York | NY    | 10003 | 212-555-7890 | 212-555-1234 | www.zab.com | 2017 | 2800000  | 1400000 | 800000      | 600000  | 280       | Utilities          |
| 10019 | 000019 | CCD Corp | 876 East St  | New York | NY    | 10002 | 212-555-8901 | 212-555-2345 | www.ccd.com | 2018 | 3100000  | 1550000 | 850000      | 700000  | 310       | Textiles           |
| 10020 | 000020 | DEF Inc  | 109 West St  | New York | NY    | 10014 | 212-555-9012 | 212-555-3456 | www.def.com | 2019 | 3400000  | 1700000 | 950000      | 750000  | 340       | Metals             |
| 10021 | 000021 | GHI LLC  | 432 South St | New York | NY    | 10016 | 212-555-0123 | 212-555-4567 | www.ghi.com | 2020 | 3700000  | 1850000 | 1000000     | 800000  | 370       | Plastics           |
| 10022 | 000022 | JKL Corp | 765 North St | New York | NY    | 10003 | 212-555-1234 | 212-555-5678 | www.jkl.com | 2021 | 4000000  | 2000000 | 1100000     | 900000  | 400       | Electronics        |
| 10023 | 000023 | MNO Inc  | 098 East St  | New York | NY    | 10002 | 212-555-2345 | 212-555-6789 | www.mno.com | 2022 | 4300000  | 2150000 | 1200000     | 950000  | 430       | Automotive         |
| 10024 | 000024 | PQR LLC  | 321 West St  | New York | NY    | 10014 | 212-555-3456 | 212-555-7890 | www.pqr.com | 2023 | 4600000  | 2300000 | 1300000     | 1000000 | 460       | Pharmaceuticals    |
| 10025 | 000025 | STU Corp | 654 South St | New York | NY    | 10016 | 212-555-4567 | 212-555-8901 | www.stu.com | 2024 | 4900000  | 2450000 | 1400000     | 1100000 | 490       | Insurance          |
| 10026 | 000026 | VWX Inc  | 987 North St | New York | NY    | 10003 | 212-555-5678 | 212-555-9012 | www.vwx.com | 2025 | 5200000  | 2600000 | 1500000     | 1200000 | 520       | Utilities          |
| 10027 | 000027 | YZA LLC  | 210 East St  | New York | NY    | 10002 | 212-555-6789 | 212-555-0123 | www.yza.com | 2026 | 5500000  | 2750000 | 1600000     | 1300000 | 550       | Textiles           |
| 10028 | 000028 | BCD Corp | 543 West St  | New York | NY    | 10014 | 212-555-7890 | 212-555-1234 | www.bcd.com | 2027 | 5800000  | 2900000 | 1700000     | 1400000 | 580       | Metals             |
| 10029 | 000029 | EFG Inc  | 876 South St | New York | NY    | 10016 | 212-555-8901 | 212-555-2345 | www.efg.com | 2028 | 6100000  | 3050000 | 1800000     | 1500000 | 610       | Plastics           |
| 10030 | 000030 | HIJ LLC  | 109 North St | New York | NY    | 10003 | 212-555-9012 | 212-555-3456 | www.hij.com | 2029 | 6400000  | 3200000 | 1900000     | 1600000 | 640       | Electronics        |
| 10031 | 000031 | KLM Corp | 432 East St  | New York | NY    | 10002 | 212-555-0123 | 212-555-4567 | www.klm.com | 2030 | 6700000  | 3350000 | 2000000     | 1700000 | 670       | Automotive         |
| 10032 | 000032 | NOP Inc  | 765 West St  | New York | NY    | 10014 | 212-555-1234 | 212-555-5678 | www.nop.com | 2031 | 7000000  | 3500000 | 2100000     | 1800000 | 700       | Pharmaceuticals    |
| 10033 | 000033 | QRS LLC  | 098 South St | New York | NY    | 10016 | 212-555-2345 | 212-555-6789 | www.qrs.com | 2032 | 7300000  | 3650000 | 2200000     | 1900000 | 730       | Insurance          |
| 10034 | 000034 | TUV Corp | 321 North St | New York | NY    | 10003 | 212-555-3456 | 212-555-7890 | www.tuv.com | 2033 | 7600000  | 3800000 | 2300000     | 2000000 | 760       | Utilities          |
| 10035 | 000035 | WXY Inc  | 654 East St  | New York | NY    | 10002 | 212-555-4567 | 212-555-8901 | www.wxy.com | 2034 | 7900000  | 3950000 | 2400000     | 2100000 | 790       | Textiles           |
| 10036 | 000036 | ZAB LLC  | 987 West St  | New York | NY    | 10014 | 212-555-5678 | 212-555-9012 | www.zab.com | 2035 | 8200000  | 4100000 | 2500000     | 2200000 | 820       | Metals             |
| 10037 | 000037 | CCD Corp | 210 South St | New York | NY    | 10016 | 212-555-6789 | 212-555-0123 | www.ccd.com | 2036 | 8500000  | 4250000 | 2600000     | 2300000 | 850       | Plastics           |
| 10038 | 000038 | DEF Inc  | 543 North St | New York | NY    | 10003 | 212-555-7890 | 212-555-1234 | www.def.com | 2037 | 8800000  | 4400000 | 2700000     | 2400000 | 880       | Electronics        |
| 10039 | 000039 | GHI LLC  | 876 East St  | New York | NY    | 10002 | 212-555-8901 | 212-555-2345 | www.ghi.com | 2038 | 9100000  | 4550000 | 2800000     | 2500000 | 910       | Automotive         |
| 10040 | 000040 | JKL Corp | 109 West St  | New York | NY    | 10014 | 212-555-9012 | 212-555-3456 | www.jkl.com | 2039 | 9400000  | 4700000 | 2900000     | 2600000 | 940       | Pharmaceuticals    |
| 10041 | 000041 | MNO Inc  | 432 South St | New York | NY    | 10016 | 212-555-0123 | 212-555-4567 | www.mno.com | 2040 | 9700000  | 4850000 | 3000000     | 2700000 | 970       | Insurance          |
| 10042 | 000042 | PQR LLC  | 765 North St | New York | NY    | 10003 | 212-555-1234 | 212-555-5678 | www.pqr.com | 2041 | 10000000 | 5000000 | 3100000     | 2800000 | 1000      | Utilities          |
| 10043 | 000043 | STU Corp | 098 East St  | New York | NY    | 10002 | 212-555-2345 | 212-555-6789 | www.stu.com | 2042 | 10300000 | 5150000 | 3200000     | 2900000 | 1030      | Textiles           |
| 10044 | 000044 | VWX Inc  | 321 West St  | New York | NY    | 10014 | 212-555-3456 | 212-555-7890 | www.vwx.com | 2043 | 10600000 | 5300000 | 3300000     | 3000000 | 1060      | Metals             |
| 10045 | 000045 | YZA LLC  | 654 South St | New York | NY    | 10016 | 212-555-4567 | 212-555-8901 | www.yza.com | 2044 | 10900000 | 5450000 | 3400000     | 3100000 | 1090      | Plastics           |
| 10046 | 000046 | BCD Corp | 987 North St | New York | NY    | 10003 | 212-555-5678 | 212-555-9012 | www.bcd.com | 2045 | 11200000 | 5600000 | 3500000     | 3200000 | 1120      | Electronics        |
| 10047 | 000047 | EFG Inc  | 210 East St  | New York | NY    | 10002 | 212-555-6789 | 212-555-0123 | www.efg.com | 2046 | 11500000 | 5750000 | 3600000     | 3300000 | 1150      | Automotive         |
| 10048 | 000048 | HIJ LLC  | 543 West St  | New York | NY    | 10014 | 212-555-7890 | 212-555-1234 | www.hij.com | 2047 | 11800000 | 5900000 | 3700000     | 3400000 | 1180      | Pharmaceuticals    |
| 10049 | 000049 | KLM Corp | 876 South St | New York | NY    | 10016 | 212-555-8901 | 212-555-2345 | www.klm.com | 2048 | 12100000 | 6050000 | 3800000     | 3500000 | 1210      | Insurance          |
| 10050 | 000050 | NOP Inc  | 109 North St | New York | NY    | 10003 | 212-555-9012 | 212-555-3456 | www.nop.com | 2049 | 12400000 | 6200000 | 3900000     | 3600000 | 1240      | Utilities          |
| 10051 | 000051 | QRS LLC  | 432 East St  | New York | NY    | 10002 | 212-555-0123 | 212-555-4567 | www.qrs.com | 2050 | 12700000 | 6350000 | 4000000     | 3700000 | 1270      | Textiles           |
| 10052 | 000052 | TUV Corp | 765 West St  | New York | NY    | 10014 | 212-555-1234 | 212-555-5678 | www.tuv.com | 2051 | 13000000 | 6500000 | 4100000     | 3800000 | 1300      | Metals             |
| 10053 | 000053 | WXY Inc  | 098 South St | New York | NY    | 10016 | 212-555-2345 | 212-555-6789 | www.wxy.com | 2052 | 13300000 | 6650000 | 4200000     | 3900000 | 1330      | Plastics           |
| 10054 | 000054 | ZAB LLC  | 321 North St | New York | NY    | 10003 | 212-555-3456 | 212-555-7890 | www.zab.com | 2053 | 13600000 | 6800000 | 4300000     | 4000000 | 1360      | Electronics        |
| 10055 | 000055 | CCD Corp | 654 East St  | New York | NY    | 10002 | 212-555-4567 | 212-555-8901 | www.ccd.com | 2054 | 13900000 | 6950000 | 4400000     | 4100000 | 1390      | Automotive         |
| 10056 | 000056 | DEF Inc  | 987 West St  | New York | NY    | 10014 | 212-555-5678 | 212-555-9012 | www.def.com | 2055 | 14200000 | 7100000 | 4500000     | 4200000 | 1420      | Pharmaceuticals    |
| 10057 | 000057 | GHI LLC  | 210 South St | New York | NY    | 10016 | 212-555-6789 | 212-555-0123 | www.ghi.com | 2056 | 14500000 | 7250000 | 4600000     | 4300000 | 1450      | Insurance          |
| 10058 | 000058 | JKL Corp | 543 North St | New York | NY    | 10003 | 212-555-7890 | 212-555-1234 | www.jkl.com | 2057 | 14800000 | 7400000 | 4700000     | 4400000 | 1480      | Utilities          |
| 10059 | 000059 | MNO Inc  | 876 East St  | New York | NY    | 10002 | 212-555-8901 | 212-555-2345 | www.mno.com | 2058 | 15100000 | 7550000 | 4800000     | 4500000 | 1510      | Textiles           |
| 10060 | 000060 | PQR LLC  | 109 West St  | New York | NY    | 10014 | 212-555-9012 | 212-555-3456 | www.pqr.com | 2059 | 15400000 | 7700000 | 4900000     | 4600000 | 1540      | Metals             |
| 10061 | 000061 | STU Corp | 432 South St | New York | NY    | 10016 | 212-555-0123 | 212-555-4567 | www.stu.com | 2060 | 15700000 | 7850000 | 5000000     | 4700000 | 1570      | Plastics           |
| 10062 | 000062 | VWX Inc  | 765 North St | New York | NY    | 10003 | 212-555-1234 |              |             |      |          |         |             |         |           |                    |

| Index | Code   | Company         | Address       | City          | State | Zip   | Phone          | Fax            | Website     | Year | Revenue  | Employees | Industry           | Market            | Notes |
|-------|--------|-----------------|---------------|---------------|-------|-------|----------------|----------------|-------------|------|----------|-----------|--------------------|-------------------|-------|
| 1     | 000001 | ABC CORP        | 123 Main St   | New York      | NY    | 10001 | 212-555-1234   | 212-555-5678   | www.abc.com | 1998 | 10000000 | 500       | Manufacturing      | Industrial        |       |
| 2     | 000002 | DEF INC         | 456 Park Ave  | Los Angeles   | CA    | 90001 | 310-555-9876   | 310-555-4321   | www.def.com | 2001 | 20000000 | 1000      | Technology         | Software          |       |
| 3     | 000003 | GHI LLC         | 789 Broadway  | Chicago       | IL    | 60601 | 312-555-2345   | 312-555-6789   | www.ghi.com | 2005 | 50000000 | 2000      | Retail             | Department Store  |       |
| 4     | 000004 | JKL CO          | 321 Market St | San Francisco | CA    | 94101 | 415-555-3456   | 415-555-7890   | www.jkl.com | 2003 | 15000000 | 750       | Finance            | Investment        |       |
| 5     | 000005 | MNO GROUP       | 654 State St  | Phoenix       | AZ    | 85001 | 602-555-4567   | 602-555-8901   | www.mno.com | 2000 | 8000000  | 400       | Healthcare         | Pharmaceutical    |       |
| 6     | 000006 | PQR ENTERPRISES | 987 Main St   | Seattle       | WA    | 98101 | 206-555-5678   | 206-555-9012   | www.pqr.com | 2002 | 12000000 | 600       | Energy             | Oil & Gas         |       |
| 7     | 000007 | STU CORP        | 135 Park Ave  | London        | UK    | EC1A  | 44-20-555-6789 | 44-20-555-0123 | www.stu.com | 1999 | 30000000 | 1500      | Media              | Television        |       |
| 8     | 000008 | VWX INC         | 246 Broadway  | Los Angeles   | CA    | 90001 | 310-555-7890   | 310-555-1234   | www.vwx.com | 2004 | 7000000  | 350       | Transportation     | Airline           |       |
| 9     | 000009 | YZA LLC         | 357 Market St | San Francisco | CA    | 94101 | 415-555-8901   | 415-555-2345   | www.yza.com | 2006 | 9000000  | 450       | Real Estate        | Commercial        |       |
| 10    | 000010 | BCD GROUP       | 468 State St  | Phoenix       | AZ    | 85001 | 602-555-9012   | 602-555-3456   | www.bcd.com | 2007 | 11000000 | 550       | Food & Beverage    | Restaurant        |       |
| 11    | 000011 | EFG CORP        | 579 Main St   | Seattle       | WA    | 98101 | 206-555-0123   | 206-555-4567   | www.efg.com | 2008 | 13000000 | 650       | Automotive         | Parts             |       |
| 12    | 000012 | HIJ INC         | 680 Park Ave  | London        | UK    | EC1A  | 44-20-555-1234 | 44-20-555-5678 | www.hij.com | 2009 | 16000000 | 800       | Telecommunications | Mobile            |       |
| 13    | 000013 | KLM CO          | 791 Broadway  | Los Angeles   | CA    | 90001 | 310-555-2345   | 310-555-6789   | www.klm.com | 2010 | 18000000 | 900       | Construction       | General           |       |
| 14    | 000014 | NOP LLC         | 802 Market St | San Francisco | CA    | 94101 | 415-555-3456   | 415-555-7890   | www.nop.com | 2011 | 20000000 | 1000      | Education          | EdTech            |       |
| 15    | 000015 | QRS GROUP       | 913 State St  | Phoenix       | AZ    | 85001 | 602-555-4567   | 602-555-8901   | www.qrs.com | 2012 | 22000000 | 1100      | Healthcare         | Medical Devices   |       |
| 16    | 000016 | TUV CORP        | 024 Main St   | Seattle       | WA    | 98101 | 206-555-5678   | 206-555-9012   | www.tuv.com | 2013 | 24000000 | 1200      | Energy             | Renewable         |       |
| 17    | 000017 | WXY INC         | 135 Park Ave  | London        | UK    | EC1A  | 44-20-555-6789 | 44-20-555-0123 | www.wxy.com | 2014 | 26000000 | 1300      | Media              | Digital           |       |
| 18    | 000018 | ZAB CO          | 246 Broadway  | Los Angeles   | CA    | 90001 | 310-555-7890   | 310-555-1234   | www.zab.com | 2015 | 28000000 | 1400      | Transportation     | Logistics         |       |
| 19    | 000019 | ACD LLC         | 357 Market St | San Francisco | CA    | 94101 | 415-555-8901   | 415-555-2345   | www.acd.com | 2016 | 30000000 | 1500      | Real Estate        | Proptech          |       |
| 20    | 000020 | DEF GROUP       | 468 State St  | Phoenix       | AZ    | 85001 | 602-555-9012   | 602-555-3456   | www.def.com | 2017 | 32000000 | 1600      | Food & Beverage    | Food Service      |       |
| 21    | 000021 | GHI CORP        | 579 Main St   | Seattle       | WA    | 98101 | 206-555-0123   | 206-555-4567   | www.ghi.com | 2018 | 34000000 | 1700      | Automotive         | Electric Vehicles |       |
| 22    | 000022 | JKL INC         | 680 Park Ave  | London        | UK    | EC1A  | 44-20-555-1234 | 44-20-555-5678 | www.jkl.com | 2019 | 36000000 | 1800      | Telecommunications | 5G                |       |
| 23    | 000023 | MNO CO          | 791 Broadway  | Los Angeles   | CA    | 90001 | 310-555-2345   | 310-555-6789   | www.mno.com | 2020 | 38000000 | 1900      | Construction       | Infrastructure    |       |
| 24    | 000024 | PQR LLC         | 802 Market St | San Francisco | CA    | 94101 | 415-555-3456   | 415-555-7890   | www.pqr.com | 2021 | 40000000 | 2000      | Education          | EdTech            |       |
| 25    | 000025 | STU GROUP       | 913 State St  | Phoenix       | AZ    | 85001 | 602-555-4567   | 602-555-8901   | www.stu.com | 2022 | 42000000 | 2100      | Healthcare         | Diagnostics       |       |
| 26    | 000026 | VWX CORP        | 024 Main St   | Seattle       | WA    | 98101 | 206-555-5678   | 206-555-9012   | www.vwx.com | 2023 | 44000000 | 2200      | Energy             | Smart Grid        |       |
| 27    | 000027 | YZA INC         | 135 Park Ave  | London        | UK    | EC1A  | 44-20-555-6789 | 44-20-555-0123 | www.yza.com | 2024 | 46000000 | 2300      | Media              | Virtual Reality   |       |
| 28    | 000028 | BCD CO          | 246 Broadway  | Los Angeles   | CA    | 90001 | 310-555-7890   | 310-555-1234   | www.bcd.com | 2025 | 48000000 | 2400      | Transportation     | Autonomous        |       |
| 29    | 000029 | EFG LLC         | 357 Market St | San Francisco | CA    | 94101 | 415-555-8901   | 415-555-2345   | www.efg.com | 2026 | 50000000 | 2500      | Real Estate        | Smart Homes       |       |
| 30    | 000030 | HIJ GROUP       | 468 State St  | Phoenix       | AZ    | 85001 | 602-555-9012   | 602-555-3456   | www.hij.com | 2027 | 52000000 | 2600      | Food & Beverage    | Plant-Based       |       |
| 31    | 000031 | KLM CORP        | 579 Main St   | Seattle       | WA    | 98101 | 206-555-0123   | 206-555-4567   | www.klm.com | 2028 | 54000000 | 2700      | Automotive         | Hybrid            |       |
| 32    | 000032 | NOP INC         | 680 Park Ave  | London        | UK    | EC1A  | 44-20-555-1234 | 44-20-555-5678 | www.nop.com | 2029 | 56000000 | 2800      | Telecommunications | IoT               |       |
| 33    | 000033 | QRS CO          | 791 Broadway  | Los Angeles   | CA    | 90001 | 310-555-2345   | 310-555-6789   | www.qrs.com | 2030 | 58000000 | 2900      | Construction       | Green Building    |       |
| 34    | 000034 | TUV LLC         | 802 Market St | San Francisco | CA    | 94101 | 415-555-3456   | 415-555-7890   | www.tuv.com | 2031 | 60000000 | 3000      | Education          | AI in Education   |       |
| 35    | 000035 | WXY GROUP       | 913 State St  | Phoenix       | AZ    | 85001 | 602-555-4567   | 602-555-8901   | www.wxy.com | 2032 | 62000000 | 3100      | Healthcare         | Telemedicine      |       |
| 36    | 000036 | ZAB CORP        | 024 Main St   | Seattle       | WA    | 98101 | 206-555-5678   | 206-555-9012   | www.zab.com | 2033 | 64000000 | 3200      | Energy             | Energy Storage    |       |
| 37    | 000037 | ACD INC         | 135 Park Ave  | London        | UK    | EC1A  | 44-20-555-6789 | 44-20-555-0123 | www.acd.com | 2034 | 66000000 | 3300      | Media              | AR/VR             |       |
| 38    | 000038 | DEF CO          | 246 Broadway  | Los Angeles   | CA    | 90001 | 310-555-7890   | 310-555-1234   | www.def.com | 2035 | 68000000 | 3400      | Transportation     | Hyperloop         |       |
| 39    | 000039 | GHI LLC         | 357 Market St | San Francisco | CA    | 94101 | 415-555-8901   | 415-555-2345   | www.ghi.com | 2036 | 70000000 | 3500      | Real Estate        | Blockchain        |       |
| 40    | 000040 | JKL GROUP       | 468 State St  | Phoenix       | AZ    | 85001 | 602-555-9012   | 602-555-3456   | www.jkl.com | 2037 | 72000000 | 3600      | Food & Beverage    | Food Security     |       |
| 41    | 000041 | MNO CORP        | 579 Main St   | Seattle       | WA    | 98101 | 206-555-0123   | 206-555-4567   | www.mno.com | 2038 | 74000000 | 3700      | Automotive         | Self-Driving      |       |
| 42    | 000042 | PQR INC         | 680 Park Ave  | London        | UK    | EC1A  | 44-20-555-1234 | 44-20-555-5678 | www.pqr.com | 2039 | 76000000 | 3800      | Telecommunications | Quantum           |       |
| 43    | 000043 | STU CO          | 791 Broadway  | Los Angeles   | CA    | 90001 | 310-555-2345   | 310-555-6789   | www.stu.com | 2040 | 78000000 | 3900      | Construction       | Smart Cities      |       |
| 44    | 000044 | VWX LLC         | 802 Market St | San Francisco | CA    | 94101 | 415-555-3456   | 415-555-7890   | www.vwx.com | 2041 | 80000000 | 4000      | Education          | EdTech            |       |
| 45    | 000045 | YZA GROUP       | 913 State St  | Phoenix       | AZ    | 85001 | 602-555-4567   | 602-555-8901   | www.yza.com | 2042 | 82000000 | 4100      | Healthcare         | AI in Healthcare  |       |
| 46    | 000046 | ZAB CORP        | 024 Main St   | Seattle       | WA    | 98101 | 206-555-5678   | 206-555-9012   | www.zab.com | 2043 | 84000000 | 4200      | Energy             | Renewable         |       |
| 47    | 000047 | ACD INC         | 135 Park Ave  | London        | UK    | EC1A  | 44-20-555-6789 | 44-20-555-0123 | www.acd.com | 2044 | 86000000 | 4300      | Media              | AI in Media       |       |
| 48    | 000048 | DEF CO          | 246 Broadway  | Los Angeles   | CA    | 90001 | 310-555-7890   | 310-555-1234   | www.def.com | 2045 | 88000000 | 4400      | Transportation     | Space             |       |
| 49    | 000049 | GHI LLC         | 357 Market St | San Francisco | CA    | 94101 | 415-555-8901   | 415-555-2345   | www.ghi.com | 2046 | 90000000 | 4500      | Real Estate        | Blockchain        |       |
| 50    | 000050 | JKL GROUP       | 468 State St  | Phoenix       | AZ    | 85001 | 602-555-9012   | 602-555-3456   | www.jkl.com | 2047 | 92000000 | 4600      | Food & Beverage    | Food Security     |       |









| Index | Code   | Company  | Address        | City          | State | Zip   | Phone        | Fax          | Website     | Year | Revenue | Employees | Market             | Notes |
|-------|--------|----------|----------------|---------------|-------|-------|--------------|--------------|-------------|------|---------|-----------|--------------------|-------|
| 1     | 000001 | ABC Corp | 123 Main St    | New York      | NY    | 10001 | 212-555-1234 | 212-555-5678 | www.abc.com | 2000 | 1000000 | 500       | Manufacturing      |       |
| 2     | 000002 | DEF Inc  | 456 Park Ave   | Los Angeles   | CA    | 90001 | 310-555-9876 | 310-555-4321 | www.def.com | 2001 | 2000000 | 1000      | Technology         |       |
| 3     | 000003 | GHI LLC  | 789 Market St  | Chicago       | IL    | 60601 | 312-555-2345 | 312-555-6789 | www.ghi.com | 2002 | 500000  | 250       | Retail             |       |
| 4     | 000004 | JKL Corp | 101 Broadway   | San Francisco | CA    | 94101 | 415-555-3456 | 415-555-7890 | www.jkl.com | 2003 | 3000000 | 1500      | Finance            |       |
| 5     | 000005 | MNO Inc  | 202 North St   | Philadelphia  | PA    | 19101 | 215-555-4567 | 215-555-8901 | www.mno.com | 2004 | 1500000 | 750       | Healthcare         |       |
| 6     | 000006 | PQR LLC  | 303 South St   | Washington DC | DC    | 20001 | 202-555-5678 | 202-555-9012 | www.pqr.com | 2005 | 800000  | 400       | Government         |       |
| 7     | 000007 | STU Corp | 404 West St    | Portland      | OR    | 97201 | 503-555-6789 | 503-555-0123 | www.stu.com | 2006 | 1200000 | 600       | Energy             |       |
| 8     | 000008 | VWX Inc  | 505 East St    | Denver        | CO    | 80201 | 303-555-7890 | 303-555-1234 | www.vwx.com | 2007 | 900000  | 450       | Transportation     |       |
| 9     | 000009 | YZA LLC  | 606 Central St | San Diego     | CA    | 92101 | 619-555-8901 | 619-555-2345 | www.yza.com | 2008 | 1100000 | 550       | Telecommunications |       |
| 10    | 000010 | BCD Corp | 707 North St   | San Jose      | CA    | 95101 | 408-555-9012 | 408-555-3456 | www.bcd.com | 2009 | 1300000 | 650       | Software           |       |
| 11    | 000011 | EFG Inc  | 808 South St   | Seattle       | WA    | 98101 | 206-555-0123 | 206-555-4567 | www.efg.com | 2010 | 1400000 | 700       | Biotechnology      |       |
| 12    | 000012 | HIJ LLC  | 909 West St    | San Antonio   | TX    | 78201 | 214-555-1234 | 214-555-5678 | www.hij.com | 2011 | 1600000 | 800       | Construction       |       |
| 13    | 000013 | KLM Corp | 1010 East St   | San Jose      | CA    | 95101 | 408-555-2345 | 408-555-6789 | www.klm.com | 2012 | 1700000 | 850       | Software           |       |
| 14    | 000014 | NOP Inc  | 1111 North St  | San Jose      | CA    | 95101 | 408-555-3456 | 408-555-7890 | www.nop.com | 2013 | 1800000 | 900       | Software           |       |
| 15    | 000015 | QRS LLC  | 1212 South St  | San Jose      | CA    | 95101 | 408-555-4567 | 408-555-8901 | www.qrs.com | 2014 | 1900000 | 950       | Software           |       |
| 16    | 000016 | TUV Corp | 1313 West St   | San Jose      | CA    | 95101 | 408-555-5678 | 408-555-9012 | www.tuv.com | 2015 | 2000000 | 1000      | Software           |       |
| 17    | 000017 | WXY Inc  | 1414 East St   | San Jose      | CA    | 95101 | 408-555-6789 | 408-555-0123 | www.wxy.com | 2016 | 2100000 | 1050      | Software           |       |
| 18    | 000018 | ZAB LLC  | 1515 North St  | San Jose      | CA    | 95101 | 408-555-7890 | 408-555-1234 | www.zab.com | 2017 | 2200000 | 1100      | Software           |       |
| 19    | 000019 | CCD Corp | 1616 South St  | San Jose      | CA    | 95101 | 408-555-8901 | 408-555-2345 | www.ccd.com | 2018 | 2300000 | 1150      | Software           |       |
| 20    | 000020 | EEF Inc  | 1717 West St   | San Jose      | CA    | 95101 | 408-555-9012 | 408-555-3456 | www.eef.com | 2019 | 2400000 | 1200      | Software           |       |
| 21    | 000021 | GGH LLC  | 1818 East St   | San Jose      | CA    | 95101 | 408-555-0123 | 408-555-4567 | www.ghh.com | 2020 | 2500000 | 1250      | Software           |       |
| 22    | 000022 | IIJ Corp | 1919 North St  | San Jose      | CA    | 95101 | 408-555-1234 | 408-555-5678 | www.ijj.com | 2021 | 2600000 | 1300      | Software           |       |
| 23    | 000023 | KKL Inc  | 2020 South St  | San Jose      | CA    | 95101 | 408-555-2345 | 408-555-6789 | www.kkl.com | 2022 | 2700000 | 1350      | Software           |       |
| 24    | 000024 | LLM LLC  | 2121 West St   | San Jose      | CA    | 95101 | 408-555-3456 | 408-555-7890 | www.llm.com | 2023 | 2800000 | 1400      | Software           |       |
| 25    | 000025 | NNP Corp | 2222 East St   | San Jose      | CA    | 95101 | 408-555-4567 | 408-555-8901 | www.nnp.com | 2024 | 2900000 | 1450      | Software           |       |
| 26    | 000026 | OOQ Inc  | 2323 North St  | San Jose      | CA    | 95101 | 408-555-5678 | 408-555-9012 | www.oqq.com | 2025 | 3000000 | 1500      | Software           |       |
| 27    | 000027 | PPR LLC  | 2424 South St  | San Jose      | CA    | 95101 | 408-555-6789 | 408-555-0123 | www.ppr.com | 2026 | 3100000 | 1550      | Software           |       |
| 28    | 000028 | RRS Corp | 2525 West St   | San Jose      | CA    | 95101 | 408-555-7890 | 408-555-1234 | www.rrs.com | 2027 | 3200000 | 1600      | Software           |       |
| 29    | 000029 | TTU Inc  | 2626 East St   | San Jose      | CA    | 95101 | 408-555-8901 | 408-555-2345 | www.ttu.com | 2028 | 3300000 | 1650      | Software           |       |
| 30    | 000030 | VVV LLC  | 2727 North St  | San Jose      | CA    | 95101 | 408-555-9012 | 408-555-3456 | www.vvv.com | 2029 | 3400000 | 1700      | Software           |       |
| 31    | 000031 | WWW Corp | 2828 South St  | San Jose      | CA    | 95101 | 408-555-0123 | 408-555-4567 | www.www.com | 2030 | 3500000 | 1750      | Software           |       |
| 32    | 000032 | XXX Inc  | 2929 West St   | San Jose      | CA    | 95101 | 408-555-1234 | 408-555-5678 | www.xxx.com | 2031 | 3600000 | 1800      | Software           |       |
| 33    | 000033 | YYY LLC  | 3030 East St   | San Jose      | CA    | 95101 | 408-555-2345 | 408-555-6789 | www.yyy.com | 2032 | 3700000 | 1850      | Software           |       |
| 34    | 000034 | ZZZ Corp | 3131 North St  | San Jose      | CA    | 95101 | 408-555-3456 | 408-555-7890 | www.zzz.com | 2033 | 3800000 | 1900      | Software           |       |
| 35    | 000035 | AAA Inc  | 3232 South St  | San Jose      | CA    | 95101 | 408-555-4567 | 408-555-8901 | www.aaa.com | 2034 | 3900000 | 1950      | Software           |       |
| 36    | 000036 | BBB LLC  | 3333 West St   | San Jose      | CA    | 95101 | 408-555-5678 | 408-555-9012 | www.bbb.com | 2035 | 4000000 | 2000      | Software           |       |
| 37    | 000037 | CCC Corp | 3434 East St   | San Jose      | CA    | 95101 | 408-555-6789 | 408-555-0123 | www.ccc.com | 2036 | 4100000 | 2050      | Software           |       |
| 38    | 000038 | DDD Inc  | 3535 North St  | San Jose      | CA    | 95101 | 408-555-7890 | 408-555-1234 | www.ddd.com | 2037 | 4200000 | 2100      | Software           |       |
| 39    | 000039 | EEE LLC  | 3636 South St  | San Jose      | CA    | 95101 | 408-555-8901 | 408-555-2345 | www.eee.com | 2038 | 4300000 | 2150      | Software           |       |
| 40    | 000040 | FFF Corp | 3737 West St   | San Jose      | CA    | 95101 | 408-555-9012 | 408-555-3456 | www.fff.com | 2039 | 4400000 | 2200      | Software           |       |
| 41    | 000041 | GGG Inc  | 3838 East St   | San Jose      | CA    | 95101 | 408-555-0123 | 408-555-4567 | www.ggg.com | 2040 | 4500000 | 2250      | Software           |       |
| 42    | 000042 | HHH LLC  | 3939 North St  | San Jose      | CA    | 95101 | 408-555-1234 | 408-555-5678 | www.hhh.com | 2041 | 4600000 | 2300      | Software           |       |
| 43    | 000043 | III Corp | 4040 South St  | San Jose      | CA    | 95101 | 408-555-2345 | 408-555-6789 | www.iii.com | 2042 | 4700000 | 2350      | Software           |       |
| 44    | 000044 | JJJ Inc  | 4141 West St   | San Jose      | CA    | 95101 | 408-555-3456 | 408-555-7890 | www.jjj.com | 2043 | 4800000 | 2400      | Software           |       |
| 45    | 000045 | KKK LLC  | 4242 East St   | San Jose      | CA    | 95101 | 408-555-4567 | 408-555-8901 | www.kkk.com | 2044 | 4900000 | 2450      | Software           |       |
| 46    | 000046 | LLL Corp | 4343 North St  | San Jose      | CA    | 95101 | 408-555-5678 | 408-555-9012 | www.lll.com | 2045 | 5000000 | 2500      | Software           |       |
| 47    | 000047 | MMM Inc  | 4444 South St  | San Jose      | CA    | 95101 | 408-555-6789 | 408-555-0123 | www.mmm.com | 2046 | 5100000 | 2550      | Software           |       |
| 48    | 000048 | NNN LLC  | 4545 West St   | San Jose      | CA    | 95101 | 408-555-7890 | 408-555-1234 | www.nnn.com | 2047 | 5200000 | 2600      | Software           |       |
| 49    | 000049 | OOO Corp | 4646 East St   | San Jose      | CA    | 95101 | 408-555-8901 | 408-555-2345 | www.ooo.com | 2048 | 5300000 | 2650      | Software           |       |
| 50    | 000050 | PPP Inc  | 4747 North St  | San Jose      | CA    | 95101 | 408-555-9012 | 408-555-3456 | www.ppp.com | 2049 | 5400000 | 2700      | Software           |       |
| 51    | 000051 | QQQ LLC  | 4848 South St  | San Jose      | CA    | 95101 | 408-555-0123 | 408-555-4567 | www.qqq.com | 2050 | 5500000 | 2750      | Software           |       |
| 52    | 000052 | RRR Corp | 4949 West St   | San Jose      | CA    | 95101 | 408-555-1234 | 408-555-5678 | www.rrr.com | 2051 | 5600000 | 2800      | Software           |       |
| 53    | 000053 | SSS Inc  | 5050 East St   | San Jose      | CA    | 95101 | 408-555-2345 | 408-555-6789 | www.sss.com | 2052 | 5700000 | 2850      | Software           |       |
| 54    | 000054 | TTT LLC  | 5151 North St  | San Jose      | CA    | 95101 | 408-555-3456 | 408-555-7890 | www.ttt.com | 2053 | 5800000 | 2900      | Software           |       |
| 55    | 000055 | UUU Corp | 5252 South St  | San Jose      | CA    | 95101 | 408-555-4567 | 408-555-8901 | www.uuu.com | 2054 | 5900000 | 2950      | Software           |       |
| 56    | 000056 | VVV Inc  | 5353 West St   | San Jose      | CA    | 95101 | 408-555-5678 | 408-555-9012 | www.vvv.com | 2055 | 6000000 | 3000      | Software           |       |
| 57    | 000057 | WWW LLC  | 5454 East St   | San Jose      | CA    | 95101 | 408-555-6789 | 408-555-0123 | www.www.com | 2056 | 6100000 | 3050      | Software           |       |
| 58    | 000058 | XXX Corp | 5555 North St  | San Jose      | CA    | 95101 | 408-555-7890 | 408-555-1234 | www.xxx.com | 2057 | 6200000 | 3100      | Software           |       |
| 59    | 000059 | YYY Inc  | 5656 South St  | San Jose      | CA    | 95101 | 408-555-8901 | 408-555-2345 | www.yyy.com | 2058 | 6300000 | 3150      | Software           |       |
| 60    | 000060 | ZZZ LLC  | 5757 West St   | San Jose      | CA    | 95101 | 408-555-9012 | 408-555-3456 | www.zzz.com | 2059 | 6400000 | 3200      | Software           |       |
| 61    | 000061 | AAA Corp | 5858 East St   | San Jose      | CA    | 95101 | 408-555-0123 | 408-555-4567 | www.aaa.com | 2060 | 6500000 | 3250      | Software           |       |
| 62    | 000062 | BBB Inc  | 5959 North St  | San Jose      | CA    | 95101 | 408-555-1234 | 408-555-5678 | www.bbb.com | 2061 | 6600000 | 3300      | Software           |       |
| 63    | 000063 | CCC LLC  | 6060 South St  | San Jose      | CA    | 95101 | 408-555-2345 | 408-555-6789 | www.ccc.com | 2062 | 6700000 | 3350      | Software           |       |
| 64    | 000064 | DDD Corp | 6161 West St   | San Jose      | CA    | 95101 | 408-555-3456 | 408-555-7890 | www.ddd.com | 2063 | 6800000 | 3400      | Software           |       |
| 65    | 000065 | EEE Inc  | 6262 East St   | San Jose      | CA    | 95101 | 408-555-4567 | 408-555-8901 | www.eee.com | 2064 | 6900000 | 3450      | Software           |       |
| 66    | 000066 | FFF LLC  | 6363 North St  | San Jose      | CA    | 95101 | 408-555-5678 | 408-555-9012 | www.fff.com | 2065 | 7000000 | 3500      | Software           |       |
| 67    | 000067 | GGG Corp | 6464 South St  | San Jose      | CA    | 95101 | 408-555-6789 | 408-555-0123 | www.ggg.com | 2066 | 7100000 | 3550      | Software           |       |
| 68    | 000068 | HHH Inc  | 6565 West St   | San Jose      | CA    | 95101 | 408-555-7890 | 408-555-1234 | www.hhh.com | 2067 | 7200000 | 3600      | Software           |       |
| 69    | 000069 | III LLC  | 6666 East St   | San Jose      | CA    | 95101 | 408-555-8901 | 408-555-2345 | www.iii.com | 2068 | 7300000 | 3650      | Software           |       |
| 70    | 000070 | JJJ Corp | 6767 North St  | San Jose      | CA    | 95101 | 408-555-9012 | 408-555-3456 | www.jjj.com | 2069 | 7400000 | 3700      | Software           |       |
| 71    | 000071 | KKK Inc  | 6868 South St  | San Jose      | CA    | 95101 | 408-555-0123 | 408-555-4567 | www.kkk.com | 2070 | 7500000 | 3750      | Software           |       |
| 72    | 000072 | LLL LLC  | 6969 West St   | San Jose      | CA    | 95101 | 408-555-1234 | 408-555-5678 | www.lll.com | 2071 | 7600000 | 3800      | Software           |       |
| 73    | 000073 | MMM Corp | 7070 East St   | San Jose      | CA    | 95101 | 408-555-2345 | 408-555-6789 | www.mmm.com | 2072 | 7700000 | 3850      | Software           |       |
| 74    | 000074 | NNN Inc  | 7171 North St  | San Jose      | CA    | 95101 | 408-555-3456 | 408-555-7890 | www.nnn.com | 2073 | 7800000 | 3900      | Software           |       |
| 75    | 000075 | OOO LLC  | 7272 South St  | San Jose      | CA    | 95101 | 408-555-4567 | 408-55       |             |      |         |           |                    |       |
