# Supplementary material for: Clonal evolution after treatment pressure in multiple myeloma: heterogenous genomic aberrations and transcriptomic convergence
Source: PubMed Central journal article supplement (PMC9252918; doi:10.1038/s41375-022-01597-y), 2022-05-28
Supplement: 41375_2022_1597_MOESM13_ESM.pdf [file 41375_2022_1597_MOESM13_ESM.pdf]

ENSG00000188483 129.490419 0.759344025 1.69272079 0.00023506 0.00561476 IER5L  
ENSG00000185615 3556.09292 1.371850225 2.58802262 0.00023783 0.00565895 PDIA2  
ENSG00000174600 61.5448969 1.216067705 2.32312648 0.00023803 0.00565895 CMKLR1  
ENSG00000170439 7.12941948 1.853578229 3.61395422 0.00023918 0.00566841 METTL7B  
ENSG0000007237 291.252318 0.952705107 1.93549839 0.00023908 0.00566841 GAS7  
ENSG00000205642 23.5837317 1.354523111 2.55712575 0.00023962 0.00566875 VCX3B  
ENSG00000224195 8.99933892 0.713758785 1.64007158 0.0002415 0.00569783 NA  
ENSG00000163535 265.314049 0.654279279 1.57382953 0.00024214 0.00570399 SG02  
ENSG00000186081 60.990921 2.50961229 5.6947019 0.00024414 0.00573882 KRT5  
ENSG0000012223 1454.85297 1.155625439 2.22780883 0.00024835 0.00580221 LTF  
ENSG00000179344 402.790193 1.041074821 2.05776013 0.00024831 0.00580221 HLA-DOB1  
ENSG00000081237 2784.47725 0.857961896 1.81247601 0.00025042 0.00583069 PTPRC  
ENSG00000187116 82.704336 1.150093276 2.21928243 0.00025658 0.00594303 LILRA5  
ENSG00000106484 400.692729 0.66355 1.58397548 0.00026155 0.00603052 MEST  
ENSG00000223518 17.7648526 1.701706101 3.25285407 0.00026331 0.00604824 NA  
ENSG00000133800 65.3727606 1.123746151 2.17912076 0.00026496 0.00607348 LYVE1  
ENSG00000125384 154.600691 1.008129207 2.01130128 0.00026819 0.00611594 PTGER2  
ENSG00000121351 7.44843115 1.586330505 3.00284603 0.00026861 0.00611908 IAPP  
ENSG00000224689 34.9699212 1.568502616 2.96596714 0.00027007 0.0061398 NA  
ENSG00000178026 67.4939554 0.731790916 1.66069935 0.00027908 0.00632504 LRRCT5B  
ENSG00000139832 61.3284552 1.026192585 2.03664225 0.00028274 0.00638844 RAB20  
ENSG00000140092 17.0068759 1.550124167 2.92842342 0.00028564 0.0064419 FBLN5  
ENSG00000123700 17.1797133 1.195985723 2.29101312 0.00028882 0.00649265 KCN12  
ENSG00000127423 45.4536228 0.769189131 1.7043116 0.00028875 0.00649265 AUNIP  
ENSG00000158486 58.3318051 0.70355101 1.62850823 0.00029225 0.00654994 DNAH3  
ENSG00000061918 46.119963 1.046260294 2.06516964 0.0002937 0.00657036 GUCY1B1  
ENSG00000113749 74.7672815 1.233393438 2.35119376 0.00029816 0.0066265 HRH2  
ENSG00000235641 21.8582936 1.522720333 2.87332331 0.00030319 0.00671626 NFKB1  
ENSG00000152583 171.961113 1.062275363 2.08822239 0.00030505 0.00672812 SPARCL1  
ENSG00000126759 209.655801 0.603258481 1.51914384 0.00030487 0.00672812 CFP  
ENSG00000205609 547.896947 1.284566842 2.436089 0.0003079 0.00677711 EIF3CL  
ENSG00000225675 14.5408815 0.897549901 1.86289957 0.00031306 0.00687025 LINC01771  
ENSG00000248740 9.6650532 1.68445197 3.21418277 0.00031395 0.00688288 NA  
ENSG00000177238 117.149887 0.927364254 1.90179831 0.00031464 0.00689116 TRIM72  
ENSG00000173218 173.43783 0.985595559 1.98013056 0.00031654 0.00692611 VANG1L  
ENSG00000204136 99.0947988 1.098982419 2.14203554 0.00031755 0.00693724 GTA1A  
ENSG00000134198 57.6956362 1.084580091 2.12075813 0.00031768 0.00693724 TSPAN2  
ENSG00000273373 77.9372612 0.683467039 1.6059946 0.00031906 0.00695378 NA  
ENSG00000122386 161.445269 0.843406634 1.79428198 0.00032052 0.00697869 ZNF205  
ENSG00000249790 179.639992 0.715118821 1.64161842 0.00032334 0.00701925 NA  
ENSG00000134256 20.228329 0.78430579 1.72226338 0.00032512 0.00705103 CD101  
ENSG00000139567 34.3841957 1.233821598 2.35189165 0.00032626 0.00706894 ACVR1L  
ENSG00000101916 49.7402803 1.004622466 2.00641838 0.00032858 0.00711221 TLR8  
ENSG00000105643 172.494087 0.777454858 1.71410425 0.00032927 0.00712239 ARRODC2  
ENSG00000169994 9.05496452 1.35936816 2.56572787 0.00033534 0.00720544 MYO7B  
ENSG00000115526 96.4064201 1.185578448 2.27454574 0.00034085 0.00729218 CHST10  
ENSG00000004399 297.075707 0.782255927 1.71991803 0.00035335 0.00750162 PAXND1  
ENSG00000118971 7819.24904 0.98835059 1.99777474 0.00036372 0.00772496 GND2  
ENSG00000144395 87.3706478 0.717941487 1.64483342 0.00037428 0.00781852 CDC150  
ENSG00000174669 67.907154 0.726000992 1.65404787 0.00037761 0.0078658 SLC29A2  
ENSG00000127124 156.026032 0.74033471 1.67056337 0.00037987 0.00790557 HIVEP3  
ENSG00000102021 15.1107187 10.33820177 1294.5202 0.00038233 0.00794919 LUTP4  
ENSG00000156269 38.3975827 1.812749287 3.51311131 0.00038589 0.0080008 NAAL1  
ENSG00000124126 1487.75137 0.91492738 1.88547416 0.00038807 0.00802207 PREX1  
ENSG00000100644 1569.65886 0.695332622 1.61925772 0.00038746 0.00802207 HIF1A  
ENSG00000233791 84.7985946 0.675681799 1.59735148 0.00038837 0.00802207 LINC01136  
ENSG00000203902 1358.08795 0.720955996 1.64827389 0.00039101 0.00806905 PLEKH01  
ENSG00000261761 70.3677364 1.082163861 2.11720925 0.00039806 0.008184 LINC02616  
ENSG00000213160 63.6757044 0.653548676 1.57303272 0.00040228 0.00825541 KLHL23  
ENSG00000157985 367.561086 1.105056206 2.15107258 0.00040337 0.00826949 AGAP1  
ENSG00000163808 320.186406 0.598831977 1.51448992 0.00040727 0.0083193 KIF15  
ENSG00000204472 265.580815 0.944540895 1.92457634 0.00041019 0.00836362 AIF1  
ENSG00000169575 11.6961699 2.221077017 4.66241368 0.00041062 0.00836469 VPBRE1  
ENSG00000267665 17.7142604 1.648808716 3.13574603 0.00041101 0.00836489 LOC040622  
ENSG00000109265 22.3383682 1.69356384 3.23454737 0.00041475 0.00842551 CRACD  
ENSG00000135636 190.278099 0.970090541 1.95896353 0.00041896 0.00847998 DVSF  
ENSG00000160179 304.876354 0.71746139 1.64428615 0.00042594 0.00858438 ABCG1  
ENSG00000230185 22.53102025 0.585135403 1.51061436 0.00042635 0.00858438 NA  
ENSG00000272143 21.1977575 1.106623007 2.15340997 0.00043559 0.00872094 FGF14-AS2  
ENSG00000079215 60.871903 0.916253311 1.88720783 0.00044409 0.00886704 SLC1A3  
ENSG00000101439 6657.36612 0.641021854 1.55943331 0.00045182 0.0089889 CST3  
ENSG00000145685 192.960176 0.63164177 1.54932711 0.00045681 0.00907999 LHFP12  
ENSG00000101695 222.84094 0.718153964 1.64507569 0.00045868 0.00910564 RNF125  
ENSG00000173372 721.333378 0.980300696 1.97287657 0.00046367 0.00917523 C1QA  
ENSG00000153253 684.336695 1.141297378 2.20579295 0.00046616 0.00919975 SCN3A  
ENSG00000196735 387.151129 0.906711728 1.87476755 0.0004659 0.00919975 HLA-DQA1  
ENSG00000104974 36.0851412 1.0413049 2.05808833 0.00046714 0.0092028 LILRA1  
ENSG00000196834 79.6218096 1.239338513 2.36090258 0.00046772 0.0092059 POTE1  
ENSG00000166483 889.621444 0.673358882 1.59478162 0.00047275 0.00925371 WEE1  
ENSG00000100427 131.834155 1.5584437 2.94535943 0.00047833 0.00933999 MLC1  
ENSG00000205628 23.4791045 1.699083921 3.24694719 0.00048159 0.00938982 LINC01446  
ENSG00000072952 37.5891379 0.904619413 1.87205058 0.00048173 0.00938982 IRAG1  
ENSG00000253522 195.282149 1.057222169 2.08092096 0.00048417 0.009414 MIR3142HG  
ENSG00000100292 1679.42659 0.826894445 1.77386282 0.00048387 0.009414 HMBOX1  
ENSG00000158270 46.9070731 0.938420613 1.91642908 0.00048429 0.00944547 COL1C12  
ENSG0000015189 672.694861 1.05570689 2.07873654 0.00048669 0.00961988 CLOC  
ENSG00000251381 60.0849196 1.055683396 2.07870264 0.00050017 0.00961937 LINC00958  
ENSG00000140678 342.050011 0.865479325 1.8219449 0.00050032 0.00961937 ITGAX  
ENSG00000163106 9.74854404 1.528937644 2.88573265 0.00050165 0.00962575 HPGD5  
ENSG00000166825 221.68843 0.828591461 1.77595061 0.00050378 0.00964984 ANPEP  
ENSG00000145850 392.757889 0.852499789 1.80562687 0.0005066 0.00967039 TIMD4  
ENSG00000267751 18.4744719 0.623128269 1.54021128 0.00050649 0.00967039 LOC105372233  
ENSG00000236663 61.5319741 1.032339754 2.04533868 0.00051155 0.00973127 FRGCA  
ENSG00000181374 6.21376302 1.681355414 3.20729135 0.00051251 0.00973989 CLL13  
ENSG00000254349 16.8113404 1.460804668 2.75261849 0.00051376 0.00973989 MIR2052HG  
ENSG00000221869 128.078222 0.959603338 1.94477512 0.00052486 0.00992486 CEBPD  
ENSG00000088526 647.358465 1.051517502 2.07270888 0.00052829 0.0099727 FCN1  
ENSG00000172292 934.346941 0.75670399 1.68962606 0.00053061 0.00998979 CERS6  
ENSG00000196209 32.5558077 1.105659876 2.15197285 0.00053488 0.01004387 SIRPB2  
ENSG00000136231 91.2558335 1.064651648 2.09166477 0.00053569 0.01004387 IFI2B2P3  
ENSG00000136943 42.5852305 0.861310826 1.81668819 0.00053557 0.01004387 CTSV  
ENSG00000132205 99.8851187 0.836372533 1.78555495 0.00054628 0.01018653 EMILIN2  
ENSG00000134755 35.8586905 0.996008711 1.99447454 0.00054816 0.01018985 DSC2  
ENSG00000164742 129.267041 0.959068946 1.94405609 0.00054854 0.01018985 ADCY1  
ENSG00000169670 220.977131 1.133334467 2.19395581 0.00055411 0.01027615 ENPP2  
ENSG00000100985 767.203017 1.138070702 2.20086507 0.00055841 0.01032628 MIMIP  
ENSG00000109743 63.2026805 0.971506009 1.96086647 0.00056062 0.01034452 BST1  
ENSG00000070371 61.4944229 0.751927196 1.68404092 0.00056107 0.01034452 CLTC1  
ENSG00000114200 753.200897 1.337624943 2.52734908 0.00056238 0.01036002 BClIE  
ENSG00000138758 1369.15939 0.647771999 1.56674675 0.00056413 0.0103836 SEPTIN11  
ENSG00000268849 15.0758053 1.731400934 3.320501 0.00056603 0.01040885 NA  
ENSG00000137825 42.0215953 0.719431941 1.64653359 0.00056691 0.01040885 ITPKA  
ENSG00000087842 79.4544934 0.650733693 1.56996641 0.00056649 0.01040885 PIR  
ENSG00000204252 70.3635871 0.931628493 1.90742786 0.00056868 0.01043177 HLA-DOA  
ENSG00000136235 595.5216 0.661014697 1.58119434 0.0005691 0.01043177 GPNMB  
ENSG00000166803 427.008836 0.634552064 1.55245566 0.00058443 0.01061604 PCLAF  
ENSG00000120885 382.802685 0.888412785 1.85113843 0.00058527 0.01062272 CLU  
ENSG00000240322 6.22496922 0.935626448 1.912721 0.00058654 0.01063666 RN7S1481P  
ENSG00000163221 595.588135 1.133489699 2.19388773 0.00059549 0.01074654 S100A12  
ENSG00000090382 2302.75216 0.976991422 1.96835634 0.00060285 0.01086153 LYZ  
ENSG00000169896 334.498517 1.051787426 2.07309672 0.00060518 0.01087708 ITGAM  
ENSG00000162551 114.972717 1.047703346 2.06723635 0.00061042 0.01094461 ALPL  
ENSG00000165905 27.5833292 1.258578579 2.39259893 0.00061132 0.01094582 LARG2  
ENSG00000168754 65.5445222 1.280751546 2.42969867 0.00061484 0.01098921 FAM178B  
ENSG00000253424 9.593489923 0.775526701 1.71181489 0.00062173 0.01108444 NA  
ENSG00000104918 28.9279603 1.458147394 2.74755316 0.00062359 0.01111786 RETN  
ENSG00000120645 219.92192 1.074662438 2.1062292 0.00062712 0.01111786 IQSEC3  
ENSG00000271590 19.5005126 0.826376889 1.77322658 0.00062941 0.01113185 NA



ENSG00000172794 523.883263 0.757950055 1.69108603 0.00145271 0.01958866 RAB37  
 ENSG00000152767 421.202033 0.612671481 1.52908805 0.00145347 0.01958866 FARP1  
 ENSG00000167613 243.986272 0.815489451 1.75989512 0.00145579 0.01960147 LAIR1  
 ENSG00000144852 44.4792197 0.713215172 1.63945371 0.00145879 0.01960222 NR112  
 ENSG00000130202 121.621838 0.836414963 1.78560746 0.00146089 0.01961701 NECTIN2  
 ENSG00000231528 8.45640575 1.850057371 3.60514521 0.00146687 0.01968535 FAM225A  
 ENSG00000114948 107.229555 1.395405629 2.63062504 0.00148925 0.01989934 ADAM23  
 ENSG00000170677 231.727606 0.860702977 1.81592293 0.00149568 0.01996313 SDC56  
 ENSG00000246465 26.5046714 0.823307731 1.76945826 0.00151444 0.02010433 NA  
 ENSG00000111962 12.839403 0.957910852 1.94249496 0.00152886 0.02030805 UST1  
 ENSG00000150275 21.8577315 1.431637737 2.69752763 0.00153528 0.02038025 PCDH15  
 ENSG00000102466 178.208829 1.296828355 2.45688164 0.0015389 0.02038025 FGF14  
 ENSG00000172037 114.25202 0.880685936 1.84125052 0.0015375 0.02038025 LAMB2  
 ENSG00000137819 17.5928803 0.725238144 1.6531735 0.00156221 0.02059052 PAQR5  
 ENSG00000227674 69.1703658 0.662825877 1.58318064 0.00156157 0.02059052 LINC00355  
 ENSG00000116600 386.635095 0.874898888 1.83387955 0.00157091 0.02066822 TYROBP  
 ENSG00000178033 36.7035515 1.120158391 2.17370836 0.00157725 0.02069188 CALHM5  
 ENSG00000187678 97.2021596 0.998260517 1.99759002 0.00157792 0.02069188 SPRY4  
 ENSG00000093134 36.7615876 0.990371428 1.98669641 0.00157831 0.02069188 VNN3  
 ENSG00000254509 9.35960488 0.679939726 1.60207282 0.00158675 0.02077159 NA  
 ENSG00000147036 37.0714069 0.743074035 1.67373837 0.00161871 0.02109579 LANCL3  
 ENSG00000164237 183.413673 0.657746418 1.57761636 0.00162283 0.0211254 CMBL  
 ENSG00000140479 163.386974 0.9909629 1.98751108 0.00162777 0.02116486 PCK56  
 ENSG00000119686 30.7569735 0.900886286 1.86721271 0.00164417 0.02136553 FLVCR2  
 ENSG00000101306 6.22665364 1.071709174 2.10192206 0.00164843 0.02139574 MYLK2  
 ENSG00000129353 949.264904 0.655855386 1.57554983 0.00165258 0.02143702 SILC44A2  
 ENSG00000236409 7.03317478 0.911085846 1.8804603 0.00165892 0.02148917 NA  
 ENSG00000006756 148.087278 0.628774203 1.54625065 0.00165804 0.02148917 ARSD  
 ENSG0000024181 59.606357 0.81283245 1.76330647 0.00165954 0.02159381 NOTCH3  
 ENSG00000147437 28.023466 0.690799756 1.61417809 0.00167075 0.02159691 GNRH1  
 ENSG00000196526 92.8742777 0.782123211 1.71965983 0.00167891 0.02165497 AFAP1  
 ENSG0000014257 36.2726502 0.935902712 1.9130873 0.00168125 0.02166235 ACP3  
 ENSG00000189409 56.8280367 0.737994512 1.66785574 0.00169423 0.02177321 MMP23B  
 ENSG00000162747 263.017325 1.113935056 2.16435186 0.00169543 0.02177602 FCGR3B  
 ENSG00000130208 174.473384 0.937184909 1.91478832 0.0017112 0.02192776 APOC1  
 ENSG00000235568 121.244541 0.775122799 1.71133571 0.00171816 0.02196605 NFAM1  
 ENSG00000272281 63.924913 1.03892149 2.0547917 0.00172706 0.02204165 NA  
 ENSG00000164692 801.687051 0.915380298 1.88606618 0.00173162 0.02208717 COL1A2  
 ENSG00000197992 114.145917 1.590512364 3.01156284 0.00174388 0.02219234 CLEC9A  
 ENSG00000231419 39.0683805 1.169987012 2.25009671 0.00174293 0.02219234 LINC00689  
 ENSG00000231752 36.4774142 1.416793669 2.66991473 0.00175001 0.02224478 EMBP1  
 ENSG00000214429 12.7834444 1.324915127 2.50518149 0.00175983 0.02228015 NA  
 ENSG00000142347 421.815423 0.834341242 1.78304269 0.00175539 0.02228015 MYO1F  
 ENSG00000162458 28.7100491 0.723244179 1.65089021 0.00175736 0.02228015 FBLIM1  
 ENSG00000050555 12.4616259 1.384248492 2.61035947 0.00178349 0.02248966 LAMC3  
 ENSG00000121211 87.3510473 0.621420794 1.53838947 0.00178748 0.02252716 MND1  
 ENSG00000006756 148.087278 0.628774203 1.54625065 0.00179222 0.02256123 PCDHGB1  
 ENSG00000267698 12.5825357 0.653578491 1.57306522 0.00179998 0.02260747 LOC101927572  
 ENSG00000181631 61.1349858 1.02333324 2.03260973 0.00181312 0.02296054 P2RY13  
 ENSG00000233379 124.533158 1.057040563 2.08065903 0.00183615 0.02296659 NA  
 ENSG00000117594 31.311086 1.134260691 2.19506048 0.00184742 0.02303621 HSD11B1  
 ENSG00000237978 26.4711804 0.965767482 1.95310225 0.00184936 0.02304463 NA  
 ENSG00000171621 141.321159 0.957197316 1.94153446 0.00186117 0.02315127 SPB1  
 ENSG00000088992 130.681172 0.846794314 1.79850019 0.00186906 0.02319012 TESC  
 ENSG00000226465 8.33435814 1.117591445 2.16984418 0.00188982 0.02339835 NA  
 ENSG00000090534 9.79578226 6.573364827 95.2313598 0.00189609 0.02345542 THPO  
 ENSG00000224526 249.897193 0.729357379 1.65790045 0.00190533 0.02353021 DEPDC1  
 ENSG00000189064 275.526806 2.41751769 5.34250995 0.00192167 0.02369237 GAGE2B  
 ENSG00000103552 12.5140305 1.340881085 2.53305971 0.00193787 0.02382464 CEACAM4  
 ENSG00000138771 1308.91506 1.001515803 2.00210245 0.00194215 0.0238387 SHROOM3  
 ENSG00000124839 27.5336679 1.816772996 3.52292313 0.00195624 0.02394527 RAB17  
 ENSG00000120669 107.946717 0.888679791 1.85148106 0.00196802 0.02404962 SOHLH2  
 ENSG00000158163 8.66407618 1.292019927 2.44870661 0.00197074 0.02406951 DZIP1L  
 ENSG00000106823 24.7729393 1.003152149 2.00437458 0.0020021 0.02427852 ECM2  
 ENSG00000170190 45.7291045 0.704840179 1.62996409 0.00201396 0.02434237 SLIC16A5  
 ENSG00000189229 30.5248586 0.978717054 1.97071213 0.00201842 0.02438287 NA  
 ENSG00000143842 24.3445949 0.921849133 1.89454208 0.00202464 0.02443135 SOK3  
 ENSG00000154654 217.800037 0.894654883 1.85916509 0.00203009 0.02447045 NCAM2  
 ENSG00000257335 183.68912 0.918605026 1.89028665 0.0020421 0.02448666 MGAM  
 ENSG00000196549 286.482409 0.839922268 1.78995421 0.00203927 0.02448666 MME  
 ENSG00000158402 95.2361965 0.632460881 1.55020701 0.00203734 0.02448666 CDC25C  
 ENSG00000102780 239.581721 0.688410549 1.61150711 0.00205155 0.02456869 DGKH  
 ENSG00000170390 15.1642378 1.048808347 2.06882032 0.00206633 0.0246923 DCLK2  
 ENSG00000127990 263.994168 1.047009519 2.06624241 0.00206852 0.02470512 SGCE  
 ENSG00000158715 23.7919108 0.715158878 1.641664 0.00208934 0.02488662 SLIC5A3  
 ENSG00000134940 6.20875848 0.996032702 1.99450771 0.00209969 0.02496958 ACRV1  
 ENSG00000160360 62.1650254 0.822382079 1.76832332 0.00209935 0.02496958 GPSM1  
 ENSG00000144677 95.0452322 0.936007664 1.91322648 0.00210708 0.02503058 CTDSP1  
 ENSG00000228065 44.4045382 0.830526136 1.77833378 0.00213616 0.02535353 NA  
 ENSG00000242498 43.1421767 0.700943266 1.62556728 0.00214696 0.02540896 ARPIN  
 ENSG00000230257 30.3489074 1.54443035 2.91688872 0.00214882 0.02541732 NFE4  
 ENSG00000147381 179.122199 2.290608845 4.89262546 0.00215712 0.02546213 MAGEA4  
 ENSG00000103534 44.7247202 0.994490834 1.99237724 0.00215464 0.02546213 TMCS  
 ENSG00000135046 4804.37416 0.81052452 1.75394897 0.00217136 0.02554752 ANXA1  
 ENSG00000140952 26.338959 0.885285531 1.84713016 0.00217661 0.02559564 CMTM2  
 ENSG00000197472 14.2895359 1.166963602 2.24496601 0.00219305 0.0257207 ZNF695  
 ENSG00000101938 140.22981 0.101809912 2.02523472 0.00221244 0.0258956 CHRD1L  
 ENSG00000148468 819.05486 0.828353938 1.77565824 0.00221381 0.0258956 FAM171A1  
 ENSG00000150893 31.6088547 1.548011185 2.92413757 0.00221623 0.0259102 FREM2  
 ENSG00000158292 21.9602783 0.840333539 1.79046403 0.00225683 0.02627388 GPR153  
 ENSG00000189023 82.588975 1.573362365 2.97597491 0.00227869 0.02645884 MAGEB16  
 ENSG00000248672 295.375717 1.408091452 2.6538585 0.00229032 0.02655212 LY75-CD30  
 ENSG00000143079 36.3827789 0.904968412 1.8725035 0.00230298 0.02665707 CTNBP2NL  
 ENSG00000198502 445.075982 0.834288062 1.78297696 0.00231736 0.0267465 HLA-DRB5  
 ENSG00000248302 44.3898723 1.066378008 2.0941692 0.00233436 0.02686571 NA  
 ENSG00000143341 44.8185272 1.387406138 2.61607905 0.00233655 0.02687703 HMCN1  
 ENSG00000112280 9.33987872 1.359708842 2.56633882 0.00233363 0.02704532 COL9A1  
 ENSG00000163814 18.8622295 0.948484537 1.92984441 0.00235821 0.02705599 CDCP1  
 ENSG00000269994 48.3757823 1.105470961 2.15169108 0.00236066 0.02706024 LOC440173  
 ENSG00000162894 793.845262 0.825393755 1.77201861 0.00237032 0.02714662 FCMR  
 ENSG00000259316 64.3087675 0.83957521 1.78952315 0.00238638 0.02728277 NA  
 ENSG00000007350 19.3382708 1.49668099 2.82192763 0.00239173 0.02730802 TKTL1  
 ENSG00000182732 19.1753857 1.23595515 2.3553397 0.00240155 0.02736881 RGS6  
 ENSG00000131378 202.309806 0.615151707 1.53171906 0.00240119 0.02736881 RFTN1  
 ENSG00000233901 19.1583789 0.944567518 1.92465185 0.00244075 0.02744532 LINC01503  
 ENSG00000111344 104.796541 1.098872641 2.14818756 0.00241837 0.02750387 RASAL1  
 ENSG00000101336 197.252705 0.803071447 1.74481182 0.00243212 0.02760352 HCK  
 ENSG00000153283 63.4690062 0.961305963 1.94707163 0.00243547 0.02761323 CD96  
 ENSG00000255983 15.8130126 1.296629955 2.45654379 0.00246571 0.02789642 NA  
 ENSG00000164251 11.7122248 1.221990971 2.33268414 0.00246675 0.02789642 F2RL1  
 ENSG00000236675 20.1468536 0.749884295 1.68165796 0.00247603 0.02798707 MTKX1P1  
 ENSG00000251226 29.2270249 1.193936502 2.28776125 0.00248632 0.02802352 LINC02714  
 ENSG00000177689 12.2655025 1.184844288 2.27338856 0.00248427 0.02802352 MAGEB10  
 ENSG00000174611 32.3345184 0.923769382 1.89706536 0.00249221 0.02802352 KY  
 ENSG00000109072 13.8013652 0.871573007 1.82965673 0.00250832 0.02810815 VTN  
 ENSG00000110042 178.809441 0.657522298 1.5773713 0.00253129 0.02832253 DTX4  
 ENSG00000187164 291.046355 0.692734797 1.61634459 0.00254995 0.0284873 SHTN1  
 ENSG00000059804 1346.1153 0.819176727 1.76439885 0.00262304 0.02911376 SLIC2A3  
 ENSG00000151025 17.9743156 1.456719047 2.74483428 0.00262949 0.02915616 GPR158  
 ENSG00000134769 98.7440536 0.767198168 1.70196122 0.00262842 0.02915616 DTNA  
 ENSG00000121594 9.99211642 0.960950471 1.94659192 0.00264331 0.02925076 CD80  
 ENSG0000034053 122.826148 0.943925244 1.92375522 0.00264472 0.02925179 APBA2  
 ENSG00000124260 81.1352927 1.241999191 2.36526667 0.00266516 0.02942264 MAGEA10  
 ENSG00000267435 67.21583789 0.641898817 1.56017287 0.0026728 0.0294593 NA  
 ENSG00000171659 7.25959007 1.055996915 2.07906796 0.00270123 0.02963995 GRR34  
 ENSG00000100344 7.32846189 1.077910042 2.1109758 0.00276809 0.03015317 PNPLA3  
 ENSG00000132170 38.205066 0.86132027 1.81670009 0.00281574 0.03056323 PPARG  
 ENSG00000173068 106.497589 0.927130654 1.9014904 0.00282528 0.03064046 BNC2

ENSG00000232677 294.522922 0.741943205 1.67242696 0.00285188 0.03084966 LINC00665
ENSG00000167695 38.6353991 0.643976392 1.56263019 0.00285151 0.03084966 TLCD3A
ENSG00000168959 26.5810343 1.145171236 2.2117238 0.00285669 0.03088529 GRM5
ENSG00000190989 24.2294865 0.848915879 1.80114693 0.00286357 0.03091572 CDR2L
ENSG00000049130 25.0833188 1.138243447 2.20112862 0.00286697 0.03092225 KITLG
ENSG00000164796 25.3466641 1.061120347 2.08655124 0.00288348 0.03106997 CSMD3
ENSG00000100079 10.4149915 1.575021029 2.97939835 0.00291586 0.0313351 LGALS2
ENSG00000215270 19.9748727 1.027165365 2.03801598 0.00292813 0.03141441 NA
ENSG00000143665 6.14154373 1.718373872 3.29065293 0.00294794 0.03156493 CFHR4
ENSG00000131650 35.7091051 0.883383253 1.84469622 0.00298245 0.03179746 KREMBN2
ENSG00000126778 38.6727621 0.948207199 1.93081133 0.00298981 0.03187672 SKI1
ENSG00000134222 57.4879722 0.663473417 1.5838914 0.00299739 0.03187672 PSRC1
ENSG00000151948 47.406305 0.875084611 1.83411565 0.00300751 0.03192111 GLT1D1
ENSG00000143546 2958.55493 0.905714409 1.87347199 0.00303705 0.0321767 S100A8
ENSG00000196668 67.6242938 0.778184398 1.71497126 0.0030459 0.03223969 LINC00173
ENSG00000156509 45.7858401 0.686528691 1.60940642 0.00305559 0.0323113 FBXO43
ENSG00000146070 76.3288759 1.06445293 2.09137668 0.00309795 0.0325726 PLAZG7
ENSG00000180891 48.8726415 0.958639319 1.94347604 0.00312378 0.03278188 CUEDC1
ENSG00000250102 22.5733702 1.469650138 2.76954722 0.00313484 0.03286679 NA
ENSG00000169550 58.6894194 1.788632991 3.45487375 0.00315448 0.03300608 MUC15
ENSG00000197933 73.6016582 0.660944173 1.58111705 0.00315307 0.03300608 ZNF823
ENSG00000204282 444.910581 0.78315611 1.72089146 0.00318845 0.03327138 NA
ENSG00000161642 103.455902 0.703205796 1.6281186 0.00318628 0.03327138 ZNF385A
ENSG00000108511 8.28005297 1.234669093 2.35327365 0.00321652 0.03351688 HOXB6
ENSG00000263711 131.226193 1.265668815 2.40438648 0.00321959 0.03353307 LINC02864
ENSG00000105376 168.120666 0.758784013 1.69206385 0.00322448 0.03356826 IGAM5
ENSG00000248810 35.3836261 1.564717051 2.95819478 0.00322895 0.03359895 LINC02432
ENSG00000165949 2809.88969 0.826116567 1.77290664 0.00323857 0.03365163 IFI27
ENSG00000148942 41.2749887 0.863204608 1.81760865 0.00324777 0.03368924 SILCSA12
ENSG00000112319 142.403262 1.46869799 2.76771999 0.00325317 0.03369264 EVA4
ENSG00000108891 76.8445757 1.185603573 2.27458535 0.00325241 0.03369264 CCL2
ENSG00000143776 178.974432 0.891745661 1.85541982 0.00326369 0.03377005 CDC42BPA
ENSG00000184730 149.803873 0.662319084 1.5826246 0.00326658 0.0337842 APOBR
ENSG00000174705 41.0944054 0.825929626 1.77267693 0.003273 0.03380316 SH3PXD2B
ENSG00000204624 19.2963375 1.075838979 2.10794756 0.0032731 0.03426818 DISP3
ENSG00000182798 19.0733606 1.213765926 2.31942296 0.00333182 0.03429872 MAGEB17
ENSG00000138180 314.176897 0.621473989 1.5384462 0.00333391 0.03430287 CEP55
ENSG00000077522 17.1607008 2.118072424 4.34113541 0.00336302 0.03448266 ACTN2
ENSG00000152076 20.002259 0.89040266 1.85369342 0.00336128 0.03448266 CDC74B
ENSG00000245848 95.5128909 0.816355182 1.76095151 0.00336821 0.0344969 CECPA
ENSG00000261669 12.3358144 0.863851417 1.81989021 0.00339557 0.03466487 NA
ENSG00000155980 48.5043999 0.730929116 1.65970762 0.00341769 0.03477844 KIF5A
ENSG00000183690 20.8560833 1.126581722 2.18340797 0.00344866 0.03496684 EFHC2
ENSG00000151892 30.871278 1.316827733 2.49117735 0.0034641 0.03507345 GFRA1
ENSG00000172346 27.4754322 1.001306851 2.0018125 0.00348847 0.03523962 CSDC2
ENSG00000137462 100.418119 0.737615016 1.66741708 0.00351052 0.03542509 TLR2
ENSG00000164078 24.1645662 0.790182219 1.72929287 0.00357731 0.03587513 MST1R
ENSG00000173621 136.633274 0.861559475 1.58179153 0.00357903 0.03587513 LRFM4
ENSG00000121933 37.2701463 0.770021286 1.70524994 0.00358226 0.03589234 TM6GD3
ENSG00000271127 39.3075017 1.464854348 2.76035601 0.00359099 0.03594719 NA
ENSG00000232977 8.49389567 0.892806347 1.85678445 0.00359635 0.03598463 LINC00327
ENSG00000162692 806.211691 0.949087688 1.93065139 0.00360165 0.03602141 VCAM1
ENSG00000205212 53.4192587 1.526488988 2.8808389 0.0036093 0.036049 CDC144NL
ENSG00000234409 9.64858646 0.800924853 1.74221763 0.00362296 0.0361167 CDC188
ENSG00000113721 91.2086508 0.687246515 1.61020739 0.00361926 0.0361167 PDGFRB
ENSG00000103196 65.6618448 0.75623764 1.68907998 0.00365375 0.03637814 CRISPLD2
ENSG00000060718 63.3300905 1.100526963 2.14433003 0.00368911 0.03661495 COL1A1
ENSG00000109674 42.6026194 0.790487169 1.72965843 0.00369712 0.03667805 NEIL3
ENSG00000230426 8.30400887 1.161833235 2.23741556 0.00370557 0.0367333 LINC01036
ENSG00000204681 334.187439 0.698758303 1.62310722 0.00370601 0.0367333 GABBR1
ENSG00000115705 161.780592 1.349429776 2.54811392 0.00371202 0.03677639 TPO
ENSG00000165092 83.1295431 0.834814278 1.78362741 0.00371457 0.03678522 ALDH1A1
ENSG00000158286 704.405208 0.643899312 1.5625467 0.00372147 0.03683705 RNIF207
ENSG00000224141 17.79052 0.848491486 1.80061718 0.00373118 0.03690015 MIR548XHKG
ENSG00000104044 40.1652257 0.996309223 1.99489004 0.00377208 0.03718843 OCA2
ENSG00000230453 18.0412619 0.945202174 1.92545869 0.00378704 0.03730268 AHWK18B
ENSG00000070601 13.8747632 0.922673379 1.89552472 0.00379207 0.03731898 FRMPD1
ENSG00000135218 269.96983 0.813749823 1.75777428 0.00380049 0.0373853 CD36
ENSG00000174945 27.9081134 0.760872517 1.70511911 0.00380836 0.03744608 AMZ1
ENSG00000008516 178.150356 0.856304617 1.81039514 0.00381015 0.03744701 MMP25
ENSG00000120498 20.721956 1.608643418 3.04964945 0.0038215 0.03752529 TEX11
ENSG00000086289 220.712484 0.766417161 1.70104011 0.00383698 0.03762724 EPRD1
ENSG00000149212 144.636481 0.648409565 1.56743929 0.00384466 0.03763585 SESN3
ENSG00000133454 289.039957 1.312186482 2.48317594 0.00384894 0.03766109 MYO18B
ENSG00000167600 9.19521445 1.458600664 2.74841653 0.00385138 0.03767243 CYP25A1
ENSG00000226942 9.05104473 0.596188268 1.51171719 0.0038864 0.03792709 NA
ENSG00000119535 593.865135 0.816123615 1.76066888 0.0039221 0.03820811 CSF3R
ENSG00000143195 269.312544 0.998001885 1.99723194 0.00396136 0.03838788 ILDR2
ENSG00000058335 48.7325049 0.780327897 1.71752119 0.00398394 0.03858731 RASGEF1
ENSG00000232564 15.0106823 0.743372229 1.67408436 0.00399186 0.03863277 MRTFA-AS1
ENSG00000267765 11.335642 1.055387693 2.07827662 0.00400244 0.03869984 NA
ENSG00000154146 163.257609 0.742848546 1.67347679 0.00400403 0.03869984 NRGNG
ENSG00000167984 203.51854 0.65811296 1.57801723 0.00400165 0.03869984 NLRC3
ENSG00000196335 81.0653186 0.702296418 1.62709267 0.0040137 0.03877638 STK31
ENSG00000197629 1086.62526 0.716218739 1.64287047 0.00407156 0.03916448 MPEG1
ENSG00000234091 7.62811426 1.056137799 2.07072762 0.00409284 0.03922188 NA
ENSG00000133216 51.0056845 0.75082664 1.68275675 0.00414869 0.03967471 EPHB2
ENSG00000168702 19.8431029 1.871983687 3.66035528 0.00417383 0.03985387 LRP1B
ENSG00000251442 10.1013169 0.93402333 1.9109663 0.00424592 0.04031621 NA
ENSG00000124248 26.7860371 0.678854042 1.60086765 0.0043301 0.04093995 NA
ENSG00000238243 13.5058364 1.491150794 2.81113121 0.0043365 0.04098294 OR2W3
ENSG00000176659 14.9222012 1.145233574 2.1181937 0.00437173 0.04121037 C20orf197
ENSG00000164066 337.967186 0.612454576 1.52885817 0.00437861 0.04124011 INTU
ENSG00000156966 39.1239548 0.651013703 1.57027115 0.00441352 0.04151596 B3GNT7
ENSG00000162888 17.3562319 0.707792861 1.63330346 0.00441851 0.04154525 NA
ENSG00000121005 41.5672425 1.097057296 2.13917913 0.0044802 0.04196819 CRISPLD1
ENSG00000101425 147.09159 0.925783693 1.89971592 0.00448725 0.0419954 BPI
ENSG00000230747 6.28732708 1.261557123 2.39754372 0.00454141 0.04235911 NA
ENSG00000149380 10.4319033 0.700316528 1.62486125 0.00455689 0.04243201 P4HA3
ENSG00000265293 12.4419843 0.753104247 1.68541544 0.00457248 0.04255002 NA
ENSG00000234397 30.5056684 0.893601401 1.85780799 0.00458603 0.04260853 PELATON
ENSG00000248131 20.5147217 1.2696745 2.41107161 0.00459773 0.04263296 NA
ENSG00000166352 163.090763 0.678406273 1.60037087 0.00460048 0.04264066 IFTAP
ENSG00000150764 271.384304 0.621245043 1.53820207 0.00469269 0.04329559 DDXDC1
ENSG00000163220 4637.83074 0.877897654 1.83769541 0.00469772 0.04331347 S100A9
ENSG00000248668 14.3232707 0.680558111 1.60275967 0.00475847 0.04373879 OXCT1-AS1
ENSG00000250038 51.1820868 0.950353172 1.93234564 0.00480275 0.04409091 NA
ENSG0000017138 31.0979027 1.175982691 2.25946732 0.0048089 0.04411078 FAM9B
ENSG00000137878 59.9403273 1.022359244 2.03123793 0.00482656 0.04419953 GCOM1
ENSG00000269834 78.2245998 0.647484762 1.56643484 0.00487246 0.04439956 ZNF528-AS1
ENSG00000225465 22.1716314 0.737385375 1.66715169 0.0048818 0.04442764 NA
ENSG00000163435 336.072808 0.651269699 1.57054981 0.00488357 0.04442764 ELF3
ENSG00000164047 190.425988 1.065252517 2.09253611 0.00491565 0.04462784 CAMP
ENSG00000076706 332.794254 0.684668982 1.60733315 0.00493054 0.04472635 MCAM
ENSG00000184343 82.1127046 0.602821467 1.51868374 0.00492869 0.04472635 SRPK3
ENSG00000102837 89.2837556 1.034719203 2.04871486 0.00494293 0.04479513 OLFM4
ENSG00000273143 93.8789956 0.640812029 1.55920652 0.00494622 0.04479513 NA
ENSG00000124795 404.27686 0.585495148 1.50055391 0.00494643 0.04488841 DEK
ENSG00000167751 42.4266581 0.635367634 1.55333353 0.00498726 0.04505628 KLK2
ENSG00000126733 10.0169345 0.904904126 1.87242006 0.00501004 0.04515526 DACH2
ENSG00000241418 6.60123463 0.807918987 1.75068435 0.00502349 0.04521034 NA
ENSG00000077327 152.407243 0.761249033 1.69495742 0.00503263 0.04522627 SPAG6
ENSG00000237510 49.931888 1.706300285 3.26322912 0.00505408 0.04534546 GPAT2P1
ENSG00000224309 4643.893448 1.040894948 2.05758136 0.00510405 0.04570116 NA
ENSG00000101222 66.1840048 0.653171721 1.72562325 0.00510898 0.04572683 CRYBB1
ENSG00000177706 48.4061563 0.941881541 1.92103199 0.00522 0.04649343 FAM20C
ENSG00000255221 9.61253702 1.263668356 2.40105484 0.00523978 0.04654607 CARD17
ENSG00000103528 12.7225824 1.185009815 2.27364942 0.00523713 0.04654607 SYT17



ENSG00000158825 74.8636096 0.848987702 1.80123661 0.00524255 0.04654607 CDA  
ENSG00000244482 57.7015239 0.64849329 1.56753026 0.00524214 0.04654607 LILRA6  
ENSG00000146166 45.2120844 0.940828084 1.91962976 0.00525902 0.04667351 LGSN  
ENSG00000159708 6.34923055 0.893666731 1.85789212 0.00529537 0.04692243 LRR3C6  
ENSG00000251357 11.225128 2.097694997 4.2802498 0.00532406 0.04708092 NA  
ENSG00000229111 9.08691605 0.785350798 1.72351135 0.00532878 0.04710387 MED4-AS1  
ENSG00000182885 124.661645 1.023414943 2.03272485 0.00533254 0.04711822 ADGRG3  
ENSG00000133687 275.112669 0.661368042 1.58158165 0.00533892 0.04711822 TMTFC1  
ENSG00000198125 39.7719153 1.72436476 3.304346 0.00534642 0.04714763 MB  
ENSG00000120594 250.118293 0.618557174 1.53533893 0.00534651 0.04714763 PLYDC2  
ENSG00000265393 6.93016214 0.762198684 1.69667349 0.00535021 0.04716149 NA  
ENSG00000125726 72.5969171 1.094136927 2.13485329 0.00535688 0.04720155 CD70  
ENSG00000203435 7.4665633 0.80768377 1.75039894 0.00537032 0.04726353 NA  
ENSG00000123080 1218.13888 0.774307118 1.71036842 0.00539401 0.04737782 CDKN2C  
ENSG00000138829 83.8623134 0.862058867 1.8176304 0.00539878 0.04738213 FBN2  
ENSG00000211898 46675.9414 0.976534798 1.96773344 0.00541096 0.04745468 IGHD  
ENSG00000171617 410.561325 0.670902789 1.59206892 0.00541651 0.04746252 ENCL1  
ENSG00000251322 44.8473727 0.934833348 1.9116698 0.00542598 0.04752667 SHANK3  
ENSG00000087253 175.924761 0.717791612 1.64466256 0.00545307 0.04765085 LPCAT2  
ENSG00000172594 94.900495 0.80605479 1.74842364 0.00548782 0.04783574 SMPDL3A  
ENSG00000136929 145.089322 0.73746992 1.66724939 0.00548747 0.04783574 HEMGN  
ENSG00000131400 94.5892603 0.639214901 1.55748136 0.00550601 0.04791867 NAPSAs  
ENSG00000180871 80.1440894 0.9888988 1.98466953 0.00557083 0.04822318 CXCR2  
ENSG00000175294 12.8968145 1.004353197 2.00604393 0.00560207 0.04841788 CATSPER1  
ENSG00000138162 68.4460591 0.815054829 1.75936501 0.00563021 0.04862318 TACC2  
ENSG00000152953 6.7491044 1.2031134 2.30235995 0.00568671 0.04903459 STK32B  
ENSG00000242574 375.531932 0.763041046 1.69706409 0.00578881 0.04968277 HLA-DMB  
ENSG00000165171 55.4425814 0.82657875 1.7734747 0.00581206 0.04980512 METTL27  
ENSG00000092884 24.5422023 0.65672351 1.57705777 0.00581562 0.04981635 MACROHD22  
ENSG00000182158 26826.5513 -0.749274216 0.59492338 1.06E-10 1.81E-07 CREB3L2  
ENSG00000125675 148.814963 -0.103068248 0.12387284 1.47E-09 1.12E-06 GRIA3  
ENSG00000166073 400.499208 -1.327405139 0.39848432 3.41E-09 1.94E-06 GPR176  
ENSG00000170017 2736.31799 -1.142061147 0.45311176 2.24E-08 8.40E-06 ALCAM  
ENSG00000121966 23028.8756 -1.24868062 0.42083289 4.28E-08 1.42E-05 CXCR4  
ENSG00000109321 4494.20414 -1.450851586 0.36580543 4.65E-08 1.47E-05 AREG  
ENSG00000178764 2508.01873 -0.667431988 0.62962643 5.94E-08 1.69E-05 ZHX2  
ENSG00000150051 979.882346 -1.363469334 0.38864656 6.28E-08 1.76E-05 MXK  
ENSG00000128590 14585.5339 -0.68032235 0.62402583 8.15E-08 1.12E-05 DNAJB9  
ENSG00000164442 14898.8601 -0.675085475 0.62629511 1.21E-07 2.77E-05 CITED2  
ENSG00000196376 305.483546 -1.539537669 0.34399567 1.21E-07 2.77E-05 SLC35F1  
ENSG00000171105 6788.40061 -0.587627061 0.66543651 1.24E-07 2.78E-05 INSR  
ENSG00000162772 8607.24639 -1.142933839 0.45283776 1.27E-07 2.80E-05 ATF3  
ENSG00000095110 121.996186 -1.576532514 0.33528678 2.68E-07 4.86E-05 NXPE1  
ENSG00000260368 52.7683534 -0.831481102 0.56195203 3.25E-07 5.71E-05 NA  
ENSG00000260916 19217.4794 -0.60728174 0.65643236 3.57E-07 6.08E-05 CCPG1  
ENSG00000261652 160.333999 -0.843394349 0.55733075 4.73E-07 7.33E-05 C15orf65  
ENSG00000137634 718.713546 -1.545844583 0.34249514 5.90E-07 8.16E-05 NXP4  
ENSG00000216863 53.5501793 -1.508224309 0.35130005 6.89E-07 9.25E-05 LY86-A11  
ENSG00000135063 50.5195023 -1.902438291 0.2674909 6.99E-07 9.32E-05 FAM189A2  
ENSG00000115963 1538.19112 -1.430319194 0.37104879 1.00E-06 0.00012151 RND3  
ENSG00000157514 74626.2322 -0.757155217 0.59166185 1.04E-06 0.00012499 TSC2D3  
ENSG00000172818 140.98376 -1.702943973 0.30715867 1.07E-06 0.00012694 OVOL1  
ENSG00000157404 1239.86167 -1.16910148 0.44469822 1.63E-06 0.00017105 KIT  
ENSG00000072694 6561.46213 -1.10180045 0.46593466 1.67E-06 0.00017362 FCGR2B  
ENSG00000164691 5320.71545 -0.72654096 0.60435118 1.93E-06 0.00019448 TAGAP  
ENSG00000109787 4280.08509 -0.659392398 0.63314489 2.21E-06 0.00021215 KLF3  
ENSG00000153208 1838.21046 -0.888820597 0.54005543 2.30E-06 0.00021833 MERTK  
ENSG00000164440 651.403245 -0.776738505 0.58368484 2.32E-06 0.00021889 TNLNB  
ENSG00000159958 928.468395 -1.038319714 0.48689422 2.34E-06 0.00021991 TNFRSF13C  
ENSG00000114737 762.026837 -1.03817875 0.4869418 2.58E-06 0.00023433 CISH  
ENSG00000171132 800.241732 -0.919993116 0.52851154 2.87E-06 0.00025313 PRKCE  
ENSG00000082438 2536.85323 -0.844726951 0.55681618 2.92E-06 0.00025663 COBLL1  
ENSG00000148841 5239.45615 -0.926489365 0.52613708 2.96E-06 0.00025916 ITPRIIP  
ENSG00000152078 832.588785 -0.776925217 0.58370344 3.41E-06 0.00028681 TLCD4  
ENSG00000166432 2307.03852 -0.808008864 0.57116961 4.48E-06 0.00034701 ZMAM1  
ENSG00000172086 987.74512 -0.62795118 0.64709445 4.57E-06 0.00035148 KRCC1  
ENSG00000167077 8342.54564 -0.760808857 0.59016536 5.14E-06 0.00038698 MEI1  
ENSG00000121358 10445.8254 -1.129371554 0.45717148 5.24E-06 0.00039391 NRAA1  
ENSG00000178977 233.245383 -0.709860651 0.61133681 5.42E-06 0.00039857 LINC00324  
ENSG00000061455 36.4720734 -1.27938545 0.41170996 6.05E-06 0.00043888 PRDM6  
ENSG00000170011 180.920299 -1.51558745 0.34975402 6.50E-06 0.000454 MYRIP  
ENSG00000245468 26.4305976 -0.820275401 0.56633382 6.88E-06 0.00047575 NA  
ENSG00000151623 166.123059 -1.087549938 0.47055983 7.12E-06 0.00048421 NR3C2  
ENSG00000125740 97278.6198 -0.882683091 0.54235783 7.39E-06 0.00049869 FOSB  
ENSG00000155465 1537.81509 -0.686779803 0.62123895 7.63E-06 0.0005086 SLC7A7  
ENSG00000164142 127.929477 -1.519378517 0.34883616 8.10E-06 0.00052723 FAM160A1  
ENSG00000230923 17.3422378 -1.131549511 0.45642524 8.34E-06 0.0005371 LINC00309  
ENSG00000259884 84.9636932 -1.54912936 0.34171622 8.33E-06 0.0005371 NA  
ENSG00000157680 228.067482 -1.022201226 0.49236454 8.52E-06 0.00054327 DGKI  
ENSG00000187699 2532.70982 -0.61486979 0.65298883 8.71E-06 0.00055117 C2orf88  
ENSG00000163297 1298.59545 -0.687709803 0.62083861 8.69E-06 0.00055117 ANTXR2  
ENSG00000073737 1120.63177 -1.317215499 0.40130875 9.78E-06 0.00060993 DHRS9  
ENSG00000123094 785.360648 -0.603242703 0.65827271 1.09E-05 0.00065703 RASSF8  
ENSG00000120051 19.5891384 -1.315877612 0.40168107 1.14E-05 0.00067787 CFAP58  
ENSG00000185633 192.608205 -0.678900531 0.62464113 1.42E-05 0.00079761 NDUFA4L2  
ENSG00000151491 356.400789 -0.634083613 0.64434997 1.91E-05 0.00100692 EP8  
ENSG00000170345 78412.2964 -0.738937855 0.59880665 1.91E-05 0.00100692 FOS  
ENSG00000133878 713.2314 -0.985366009 0.50509756 1.93E-05 0.00101424 DUSP26  
ENSG00000150347 7971.02577 -0.919768352 0.52859389 2.04E-05 0.00105164 ARID5B  
ENSG00000162771 147.125298 -1.244086008 0.42217527 2.06E-05 0.00105756 FAM71A  
ENSG00000162415 129.773966 -0.835906913 0.56023075 2.10E-05 0.00106155 ZSWIM5  
ENSG00000035720 1225.76793 -0.867853533 0.54796151 2.23E-05 0.00110673 STAP1  
ENSG00000230709 231.094862 -1.046200938 0.48424165 2.27E-05 0.00111851 LOC284191  
ENSG00000198948 2535.46235 -0.957321941 0.51501204 2.65E-05 0.00123731 MFAP3L  
ENSG00000153162 9118.39732 -0.586329279 0.66603538 2.78E-05 0.00127437 BMP6  
ENSG00000200087 91.000121 -0.863263378 0.54970771 2.79E-05 0.00127437 SNORA73B  
ENSG00000129422 2189.75355 -0.892811835 0.53856343 2.84E-05 0.00128852 MTUS1  
ENSG00000203709 7019.14437 -0.632387636 0.64510789 3.58E-05 0.00152822 NA  
ENSG00000120129 47391.4595 -0.761405979 0.58992114 3.60E-05 0.00152922 DUSP1  
ENSG00000027697 2912.30012 -0.644721502 0.63961625 3.87E-05 0.00161983 IFNGR1  
ENSG00000258792 13.7662095 -1.091708647 0.46920535 4.18E-05 0.00170231 LOC105370616  
ENSG00000271913 177.781149 -0.698247521 0.61632041 4.33E-05 0.00171805 LOC105378083  
ENSG00000091181 1737.83001 -0.727435577 0.60397654 4.29E-05 0.00171805 ILSRA  
ENSG00000122787 58.4364642 -1.004228303 0.49853673 4.31E-05 0.00171805 AKR1D1  
ENSG00000144645 1836.97486 -0.74790887 0.59546933 4.37E-05 0.00172397 OSBP110  
ENSG00000111859 2768.72774 -0.612193976 0.65420107 4.64E-05 0.00181157 NEDD9  
ENSG00000147408 2367.14661 -0.590566692 0.664082 4.77E-05 0.00184902 CSGALNACT1  
ENSG00000196468 81.9909237 -1.69246695 0.30935887 4.83E-05 0.00186007 FGF16  
ENSG00000173198 2270.34017 -0.600426454 0.65955896 5.15E-05 0.00194033 CYS1TR1  
ENSG00000197776 164.307361 -0.628164346 0.64669912 5.26E-05 0.00196079 KLHDC1  
ENSG00000126952 11.5720856 -1.412810522 0.37557931 5.56E-05 0.00204127 NXF5  
ENSG00000152939 228.800352 -0.611976824 0.65429955 5.65E-05 0.00205308 MARVELD2  
ENSG00000249141 73.9897814 -0.840215329 0.55856019 6.05E-05 0.00216675 NA  
ENSG00000164949 479.190684 -1.154081308 0.44935224 6.16E-05 0.00219156 GEM  
ENSG00000253690 42.9417017 -0.956052232 0.5154655 6.17E-05 0.00219187 NA  
ENSG00000170745 1325.21655 -1.229243715 0.42654099 6.27E-05 0.00221952 KCNS3  
ENSG00000204290 18.3937148 -0.961024156 0.51369212 6.65E-05 0.00231104 BTNL2  
ENSG00000169136 8514.10172 -0.617347187 0.65186848 6.83E-05 0.00235676 ATF5  
ENSG00000165312 12374.9113 -0.764449645 0.58867789 7.11E-05 0.00242285 OTUD1  
ENSG00000184545 367.926383 -1.096816292 0.46754713 7.47E-05 0.00251824 DUSP8  
ENSG00000078081 2645.72349 -0.719586865 0.60727132 8.02E-05 0.0026635 LAMP3  
ENSG00000267469 31.4533392 -3.702170157 0.07683087 8.02E-05 0.0026635 NA  
ENSG00000117090 4978.5178 -1.057088351 0.48060103 8.29E-05 0.00274048 SLAMF1  
ENSG00000227211 15.2489992 -1.585779864 0.32322214 8.46E-05 0.00275699 NA  
ENSG00000249741 68.1424952 -0.694342424 0.61799015 8.58E-05 0.00278265 NA  
ENSG00000199270 15.5741881 -1.43805708 0.369064 8.76E-05 0.00278265 RNASS12  
ENSG00000199334 15.5741881 -1.43805708 0.369064 8.76E-05 0.00278265 RNASS11  
ENSG00000199337 15.5741881 -1.43805708 0.369064 8.76E-05 0.00278265 RNASS3



|                 |            |               |            |            |             |              |
|-----------------|------------|---------------|------------|------------|-------------|--------------|
| ENSG00000265817 | 28.3693532 | -0.775821289  | 0.58405604 | 0.00125768 | 0.0177834   | FSBP         |
| ENSG00000144031 | 99.259596  | -0.736327931  | 0.60026526 | 0.00128512 | 0.01805614  | ANKRD53      |
| ENSG00000176697 | 43.6696609 | -0.777956414  | 0.5831923  | 0.00137712 | 0.01899678  | BDNF         |
| ENSG00000120875 | 6416.86493 | -0.729330102  | 0.60318393 | 0.00140162 | 0.01911086  | DUSP4        |
| ENSG00000164344 | 28.8725803 | -0.833005908  | 0.56135841 | 0.001421   | 0.01930382  | KLKB1        |
| ENSG00000155307 | 1195.06937 | -0.681636638  | 0.6234576  | 0.00144852 | 0.01955766  | SAMSN1       |
| ENSG00000139193 | 2394.44975 | -0.745835265  | 0.59632252 | 0.0014568  | 0.01960147  | CD27         |
| ENSG00000166897 | 153.69681  | -0.983020225  | 0.50591951 | 0.00148517 | 0.01985881  | EUFN2        |
| ENSG00000177606 | 107718.609 | -0.590764237  | 0.56399108 | 0.0014968  | 0.01996608  | JUN          |
| ENSG0000011242  | 587.785137 | -0.587129243  | 0.6656431  | 0.00152491 | 0.02027998  | RPS6KA2      |
| ENSG00000145147 | 167.726734 | -0.895711813  | 0.53748194 | 0.00152871 | 0.02030805  | SLIT2        |
| ENSG00000205929 | 50.2324119 | -0.851103755  | 0.55436045 | 0.001537   | 0.02038025  | C21orf62     |
| ENSG00000230500 | 6.23873836 | -1.325105548  | 0.39911999 | 0.00156672 | 0.020262531 | NA           |
| ENSG00000104081 | 8116.35587 | -0.696506549  | 0.61706461 | 0.00158721 | 0.02077159  | BMF          |
| ENSG00000226571 | 36.3005511 | -0.1018031075 | 0.49378979 | 0.00159803 | 0.02087623  | NA           |
| ENSG00000114251 | 1712.78426 | -0.767363353  | 0.58749018 | 0.00161781 | 0.02109579  | WNT5A        |
| ENSG00000248991 | 16.5410477 | -1.12224      | 0.45938001 | 0.00169778 | 0.02179359  | NA           |
| ENSG00000154898 | 599.835536 | -0.87107395   | 0.5467397  | 0.00174726 | 0.02222262  | NA           |
| ENSG00000229228 | 558.944926 | -0.711257768  | 0.61078741 | 0.00176486 | 0.02231828  | LINC00582    |
| ENSG00000197329 | 25799.4733 | -0.68053701   | 0.62393299 | 0.00183273 | 0.02296667  | PEL1         |
| ENSG00000103316 | 28.6452891 | -1.231347046  | 0.42591958 | 0.00184764 | 0.022303621 | CRYM         |
| ENSG00000215811 | 12.4125535 | -0.791547432  | 0.57772409 | 0.00185197 | 0.02306422  | BTNL10       |
| ENSG00000078589 | 1022.33923 | -0.5966033    | 0.66130912 | 0.00186349 | 0.02316806  | P2RY10       |
| ENSG00000179603 | 39.5324625 | -0.96565932   | 0.51204435 | 0.0018989  | 0.02346397  | GRM8         |
| ENSG00000235631 | 139.989222 | -0.600791073  | 0.65939229 | 0.00194087 | 0.02383626  | RNF148       |
| ENSG00000210196 | 601.13056  | -0.973924823  | 0.50911913 | 0.00202725 | 0.02444962  | NA           |
| ENSG00000130600 | 29.6779942 | -1.418635555  | 0.37406592 | 0.00204056 | 0.02448666  | H19          |
| ENSG00000196159 | 513.081378 | -0.873379114  | 0.54586681 | 0.00213874 | 0.02533916  | FAT4         |
| ENSG0000027543  | 9.4737828  | -0.99936653   | 0.50012955 | 0.00218106 | 0.02562079  | NA           |
| ENSG00000164197 | 101.586542 | -0.878427391  | 0.54396005 | 0.00218478 | 0.0256509   | RNF180       |
| ENSG00000144868 | 240.094174 | -0.691978594  | 0.61900433 | 0.00219897 | 0.02577646  | TMEM108      |
| ENSG00000189423 | 669.08463  | -1.05346231   | 0.48181919 | 0.00221873 | 0.02592579  | NA           |
| ENSG00000258130 | 164.050135 | -0.769713375  | 0.58653399 | 0.00222246 | 0.02594201  | LOC613038    |
| ENSG00000186847 | 33.8047091 | -1.461228223  | 0.36318381 | 0.00223122 | 0.02601684  | KRT14        |
| ENSG00000146666 | 200.257582 | -0.74395378   | 0.59710072 | 0.00230053 | 0.0266426   | LINC00525    |
| ENSG00000231858 | 12.2806121 | -0.84328879   | 0.55735604 | 0.00231368 | 0.0267465   | LOC105373805 |
| ENSG00000162595 | 117.330809 | -1.249132759  | 0.42070103 | 0.00231917 | 0.0267465   | DIRAS3       |
| ENSG00000165899 | 323.228274 | -0.619617795  | 0.65084333 | 0.00235713 | 0.02705593  | OTOGL        |
| ENSG00000153060 | 10.6531854 | -0.961995142  | 0.5133465  | 0.00235959 | 0.02705593  | TEKTS        |
| ENSG00000122733 | 24.9256699 | -1.054695284  | 0.48139889 | 0.00236103 | 0.02706024  | PHF24        |
| ENSG00000260693 | 38.5407315 | -0.699748121  | 0.61567969 | 0.00247861 | 0.02800191  | NA           |
| ENSG00000271730 | 68.5144661 | -0.5996925    | 0.65989459 | 0.00250174 | 0.0280705   | NA           |
| ENSG00000116741 | 10561.769  | -0.733502516  | 0.60144198 | 0.00259488 | 0.02884461  | RG52         |
| ENSG00000260205 | 15.7595977 | -0.968026849  | 0.51120475 | 0.00263287 | 0.02916436  | NA           |
| ENSG00000175505 | 97.1049627 | -0.652846111  | 0.63602434 | 0.0026669  | 0.02942365  | CLCF1        |
| ENSG00000271894 | 584.929354 | -0.966789505  | 0.51164338 | 0.00275742 | 0.03010723  | NA           |
| ENSG00000182601 | 70.1137477 | -0.871392949  | 0.54641805 | 0.00276765 | 0.03015317  | HS3ST4       |
| ENSG00000196458 | 389.758706 | -0.60484215   | 0.65754332 | 0.00279506 | 0.03038345  | ZNF605       |
| ENSG00000272024 | 8.3810137  | -0.595813489  | 0.66571324 | 0.00282795 | 0.03065067  | NA           |
| ENSG00000228590 | 41.4178852 | -0.96540413   | 0.5121256  | 0.00284631 | 0.03083455  | MIR4432HG    |
| ENSG00000132185 | 9004.56593 | -0.724421776  | 0.60523957 | 0.00285797 | 0.03088529  | FCRLA        |
| ENSG00000104413 | 394.024375 | -0.9471459    | 0.51865751 | 0.00286499 | 0.03091591  | ESRP1        |
| ENSG00000226979 | 97.602099  | -0.626002314  | 0.64796944 | 0.0029215  | 0.03137283  | LTA          |
| ENSG00000135069 | 5238.91625 | -0.599314672  | 0.66006743 | 0.00295103 | 0.03158269  | PSAT1        |
| ENSG00000255864 | 12.8872569 | -0.918376337  | 0.52910416 | 0.00296629 | 0.03166954  | NA           |
| ENSG00000205189 | 1788.74085 | -0.723288697  | 0.60569831 | 0.00300084 | 0.03187672  | ZBTB10       |
| ENSG00000255471 | 6.14191355 | -1.135534326  | 0.45516631 | 0.00300153 | 0.03187672  | NA           |
| ENSG00000196781 | 2531.49307 | -0.74310356   | 0.59745271 | 0.0030103  | 0.03192385  | TLE1         |
| ENSG0000065809  | 5170.12434 | -0.645590957  | 0.6392309  | 0.00302624 | 0.03207758  | FAM107B      |
| ENSG00000106952 | 376.324062 | -0.827546572  | 0.56348669 | 0.00309003 | 0.0325048   | TNFSF8       |
| ENSG00000184305 | 225.242525 | -0.589702825  | 0.66447977 | 0.00317787 | 0.0332079   | CCSER1       |
| ENSG00000115896 | 578.526074 | -0.588250198  | 0.66514916 | 0.0031879  | 0.03327138  | PLCL1        |
| ENSG00000177025 | 18.2305097 | -0.688513508  | 0.62049285 | 0.00323062 | 0.03360055  | C19orf18     |
| ENSG00000159167 | 60.0533918 | -2.031037427  | 0.24467906 | 0.00336371 | 0.03448266  | STC1         |
| ENSG00000263740 | 13.25235   | -0.830058521  | 0.56250642 | 0.00337584 | 0.03455904  | RN7SL4P      |
| ENSG00000112799 | 322.492868 | -0.668495873  | 0.6291623  | 0.00338146 | 0.03460059  | LV86         |
| ENSG00000252671 | 12.078315  | -0.74275183   | 0.59779596 | 0.00339845 | 0.03467487  | LOC101930275 |
| ENSG00000230910 | 37.3248434 | -0.88131091   | 0.54287423 | 0.0034061  | 0.03472431  | NA           |
| ENSG00000167642 | 2393.37299 | -0.588860661  | 0.66485606 | 0.00340815 | 0.03472926  | SPINT2       |
| ENSG00000241935 | 67.67145   | -0.741831265  | 0.59797983 | 0.00344884 | 0.03496684  | HOGA1        |
| ENSG00000185338 | 151.146057 | -0.67092547   | 0.62810364 | 0.00346685 | 0.03508523  | SOCS1        |
| ENSG00000197705 | 796.756709 | -1.001250084  | 0.49956694 | 0.00347832 | 0.03515307  | KLHL14       |
| ENSG00000187824 | 228.536227 | -0.611626204  | 0.65445858 | 0.00352565 | 0.03550655  | TMEM220      |
| ENSG00000224945 | 9.34684064 | -0.760296907  | 0.59037482 | 0.00354484 | 0.03564984  | NA           |
| ENSG00000165685 | 647.879263 | -0.816935948  | 0.56764625 | 0.0035729  | 0.0358511   | TMEM52B      |
| ENSG00000172548 | 220.657925 | -0.815293006  | 0.56829306 | 0.0037673  | 0.03715784  | NIPAL4       |
| ENSG00000197584 | 228.335372 | -0.749740357  | 0.59471058 | 0.00384352 | 0.03763585  | KCNMB2       |
| ENSG00000186265 | 2824.32198 | -0.603048762  | 0.65836121 | 0.00393088 | 0.03824977  | BTLA         |
| ENSG00000197385 | 172.646574 | -0.716155496  | 0.6087174  | 0.00395374 | 0.03834768  | ZNF860       |
| ENSG00000128536 | 192.33167  | -0.686025543  | 0.62156383 | 0.00404012 | 0.03892969  | CDHR3        |
| ENSG00000273179 | 6.90161425 | -0.86375132   | 0.54952182 | 0.00427987 | 0.04060376  | NA           |
| ENSG00000153234 | 3619.80792 | -0.610616201  | 0.65491692 | 0.00436766 | 0.04121037  | NR4A2        |
| ENSG00000245205 | 8.31149389 | -0.649320729  | 0.63758044 | 0.00439793 | 0.04138689  | EEF1A1P4     |
| ENSG00000240505 | 4472.48479 | -0.788686806  | 0.57887076 | 0.00444362 | 0.04175645  | TNFRSF13B    |
| ENSG00000128045 | 22.4211791 | -0.765130957  | 0.58839996 | 0.00445534 | 0.04180278  | RASL11B      |
| ENSG00000228158 | 6.55551166 | -0.961419751  | 0.51355128 | 0.00445854 | 0.04181507  | NA           |
| ENSG00000102554 | 615.490699 | -0.705604165  | 0.61181565 | 0.00454627 | 0.04238659  | KLFS         |
| ENSG00000182489 | 225.127085 | -0.776050218  | 0.58396337 | 0.00459317 | 0.04262634  | XRRX         |
| ENSG00000183230 | 258.298847 | -0.724218008  | 0.60532506 | 0.00465232 | 0.04297715  | CTNNA3       |
| ENSG00000197558 | 66.8973903 | -0.692207935  | 0.61890594 | 0.00470031 | 0.04331347  | SSPOP        |
| ENSG00000265263 | 35.5444353 | -2.40938579   | 0.18823597 | 0.00481318 | 0.044127    | NA           |
| ENSG00000150625 | 1795.11531 | -0.728101806  | 0.60369769 | 0.00484641 | 0.04431856  | GPMPA        |
| ENSG00000206077 | 142.894487 | -0.683663295  | 0.6225824  | 0.00486105 | 0.04436858  | ZDHHC11B     |
| ENSG00000118523 | 4184.53238 | -0.687266126  | 0.62102957 | 0.00488321 | 0.04442764  | CCN2         |
| ENSG00000109819 | 1130.60168 | -0.678552791  | 0.62479171 | 0.00501193 | 0.04515526  | PPARGC1A     |
| ENSG00000260093 | 8.61967898 | -0.74624836   | 0.5961518  | 0.00520004 | 0.0463763   | NA           |
| ENSG00000255730 | 338.365647 | -0.928691295  | 0.52533467 | 0.00527737 | 0.04681762  | NA           |
| ENSG00000170743 | 11.611023  | -0.779239175  | 0.58267399 | 0.00530168 | 0.04694379  | SYT9         |
| ENSG00000236051 | 10.4036402 | -0.74466293   | 0.59680729 | 0.00531048 | 0.04697965  | MYCBP2-AS1   |
| ENSG00000176490 | 437.447426 | -0.595801277  | 0.66167686 | 0.00541347 | 0.04745468  | DIRAS1       |
| ENSG00000270096 | 18.1763735 | -1.056381602  | 0.48083653 | 0.00567715 | 0.0489712   | NA           |
