# Supplementary material for: Clonal evolution after treatment pressure in multiple myeloma: heterogenous genomic aberrations and transcriptomic convergence
Source: PubMed Central journal article supplement (PMC9252918; doi:10.1038/s41375-022-01597-y), 2022-05-28
Supplement: 41375_2022_1597_MOESM14_ESM.pdf [file 41375_2022_1597_MOESM14_ESM.pdf]

**Table S8.** Proliferative index for all included samples with RNAseq data, in addition to other sample information.

| Patient_ID | Diagnosis | Progression | Progression | Progression | Progression | PI Change <sup>§</sup> | TBS      | PFS | 2nd sample | 1st progression | Ig-T/HRD | CCND1 exp | CCND2 exp    | Cyto risk <sup>§</sup> | Risk status | Progression <2 y | Progression < 1 y | dead | TTD |
|------------|-----------|-------------|-------------|-------------|-------------|------------------------|----------|-----|------------|-----------------|----------|-----------|--------------|------------------------|-------------|------------------|-------------------|------|-----|
| 65         | 1.0       | 3.9         |             |             |             | 2.93                   | 22       | 19  | yes        | HRD             | MH       | N         |              | HR                     | yes         | no               | Y                 | 0    |     |
| 63         | 1.9       | 4.7         |             |             |             | 2.79                   | 15       | 3   | no         | t(8;14)         | N        | MH        | HR (del17)   | HR                     | yes         | no*              | Y                 | 3    |     |
| 27         | 1.5       | 5.5         | 4.0         |             |             | 2.50                   | 17/2     | 17  | yes        | t(4;14)         | N        | MH        | HR (t(4;14)) | HR                     | yes         | no               | Y                 | 1    |     |
| 31         | 1.1       | 2.0         | 3.1         |             |             | 2.05                   | 14/5     | 12  | yes        | t(4;14)         | N        | L         | HR (t(4;14)) | HR                     | yes         | no               | Y                 | 1    |     |
| 20         | 1.9       | 4.2         |             |             |             | 2.32                   | 50       | 13  | no         | t(11;14)        | VH       | N         |              | HR                     | no*         | no               | Y                 | 2    |     |
| 60         | 1.5       | 4.2         |             |             |             | 2.65                   | 18       | 11  | no         | HRD             | MH       | N         |              | SR                     | yes         | no*              | Y                 | 0    |     |
| 28         | 1.9       | 4.5         |             |             |             | 2.61                   | 9        | 9   | yes        | HRD             | N        | L         |              | SR                     | yes         | Y                | Y                 | 19   |     |
| 46         | 1.9       | 4.3         |             |             |             | 2.47                   | 18       | 7   | no         | unknown         | MH       | VH        |              | SR                     | yes         | no*              | Y                 | 3    |     |
| 51         | 1.1       | 3.2         |             |             |             | 2.09                   | 18       | 9   | no         | HRD             | MH       | L         |              | SR                     | yes         | no*              | Y                 | 1    |     |
| 49         | 1.6       | 3.6         |             |             |             | 2.02                   | 18       | 10  | no         | HRD             | MH       | N         |              | SR                     | yes         | no*              | Y                 | 0    |     |
| 55         | 0.8       | 2.3         |             |             |             | 1.48                   | 18       | 17  | yes        | HRD             | N        | MH        |              | SR                     | yes         | no               | n                 | >41  |     |
| 58         | 2.5       | 3.9         |             |             |             | 1.41                   | 9        | 8   | yes        | HRD             | N        | MH        |              | SR                     | yes         | yes              | Y                 | 4    |     |
| 50         | 1.5       | 2.9         |             |             |             | 1.45                   | 36       | 2   | no         | t(11;14)        | VH       | N         |              | SR                     | no*         | no*              | n                 | >29  |     |
| 52         | 1.4       | 4.4         |             |             |             | 3.06                   | 39       | 36  | no         | HRD             | L        | N         |              | SR                     | no          | no               | n                 | >27  |     |
| 54         | 1.8       | 3.4         |             |             |             | 1.53                   | 33       | 32  | yes        | t(6;14)         | N        | N**       |              | SR                     | no          | no               | n                 | >13  |     |
| 53         | 0.6       | 2.1         |             |             |             | 1.52                   | 42       | 42  | yes        | HRD             | MH       | N         |              | SR                     | no          | no               | n                 | >25  |     |
| 18         | 2.3       | 2.3         | 3.7         |             |             | 1.35                   | 17/14    | 16  | yes        | HRD             | N        | MH        |              | SR                     | yes         | no               | Y                 | 0    |     |
| 10         | 1.8       | 3.0         |             |             |             | 1.21                   | 16       | 11  | yes        | t(4;14)         | N        | MH        | HR (t(4;14)) | HR                     | yes         | no               | Y                 | 19   |     |
| 24         | 0.3       | 1.4         |             |             |             | 1.07                   | 24       | 2   | no         | t(11;14)        | MH       | N         |              | HR                     | yes         | no*              | Y                 | 10   |     |
| 15         | 1.4       | 1.6         | 2.3         |             |             | 0.90                   | 48/13    | 45  | yes        | HRD             | MH       | N         | HR (t(4;14)) | HR                     | no          | no               | Y                 | 46   |     |
| 26         | 2.51      | 2.13        | 3.28        |             |             | 0.78                   | 14/6     | 13  | yes        | HRD             | N        | MH        |              | HR                     | yes         | no               | Y                 | 1    |     |
| 34         |           | 2.5         | 2.7         | 3.5         | 3.3         | 0.75                   | 9/7/7    | -   | no         | HRD             | N        | N         |              | SR                     | no          | no               | Y                 | 2    |     |
| 32         | 0.2       | 0.9         |             |             |             | 0.69                   | 18       | 18  | yes        | HRD             | L        | N         |              | SR                     | yes         | no               | Y                 | 1    |     |
| 42         | 1.3       | 1.9         |             |             |             | 0.65                   | 30       | 26  | yes        | HRD             | N        | L         |              | SR                     | no          | no               | Y                 | 38   |     |
| 23         | 0.5       | 0.4         | 1.1         |             |             | 0.52                   | 25/38    | 25  | yes        | HRD             | L        | N         |              | SR                     | no          | no               | Y                 | 14   |     |
| 8          |           | 1.3         | 1.8         |             |             | 0.49                   | 9        | -   | no         | t(11;14)        | VH       | N         |              | SR                     | no          | no               | Y                 | 4    |     |
| 25         | 0.3       | 0.8         | 0.8         |             |             | 0.49                   | 16/23    | 9   | no         | HRD             | L        | N         |              | SR                     | yes         | no               | Y                 | 27   |     |
| 47         | 1.8       | 2.2         |             |             |             | 0.42                   | 21       | 19  | yes        | t(4;14)         | N        | MH        | HR (t(4;14)) | HR                     | yes         | no               | Y                 | 31   |     |
| 61         | 2.9       | 3.2         |             |             |             | 0.34                   | 15       | 15  | yes        | t(11;14)        | VH       | N         | HR (del17)   | HR                     | yes         | no               | Y                 | 21   |     |
| 59         | 1.0       | 1.3         |             |             |             | 0.31                   | 18       | 11  | no         | t(4;14)         | N        | MH        | HR (t(4;14)) | HR                     | yes         | no               | n                 | >43  |     |
| 4          | 1.7       | 1.9         |             |             |             | 0.28                   | 39       | 21  | no         | t(11;14)        | VH       | N         |              | HR                     | no*         | no               | Y                 | 6    |     |
| 9          | 1.0       | 1.2         |             |             |             | 0.25                   | 38       | 27  | no         | t(11;14)        | VH       | N         |              | SR                     | no          | no               | n                 | >46  |     |
| 43         | 1.1       | 1.6         | 1.3         |             |             | 0.24                   | 30/21    | 29  | yes        | t(4;14)         | N        | MH        | HR (t(4;14)) | HR                     | no          | no               | Y                 | 21   |     |
| 48         | 1.7       | 1.8         |             |             |             | 0.18                   | 18       | 17  | yes        | HRD             | N        | MH        |              | SR                     | yes         | no               | Y                 | 5    |     |
| 30         | 0.5       | 0.6         |             |             |             | 0.15                   | 12       | 11  | yes        | HRD             | L        | N         |              | SR                     | yes         | yes              | n                 | >47  |     |
| 45         | 1.3       | 1.4         |             |             |             | 0.10                   | 36       | 37  | yes        | t(11;14)        | VH       | N         |              | SR                     | no          | no               | n                 | >7   |     |
| 29         | 0.5       | 0.5         |             |             |             | -0.01                  | 5        | 5   | yes        | HRD             | L        | N         |              | SR                     | yes         | yes              | Y                 | 20   |     |
| 33         | 0.9       | 0.9         |             |             |             | -0.06                  | 18       | 16  | yes        | t(11;14)        | VH       | N         |              | SR                     | yes         | no               | Y                 | 22   |     |
| 35         | 1.0       | 0.9         |             |             |             | -0.07                  | 24       | -   | no         | HRD             | L        | N         |              | SR                     | no          | no               | Y                 | 26   |     |
| 40         | 1.7       | 1.6         | 1.2         | 1.7         |             | -0.07                  | 21/12/21 | 18  | yes        | t(11;14)        | VH       | N         |              | SR                     | yes         | no               | n                 | >18  |     |
| 66         | 2.2       | 1.9         |             |             |             | -0.29                  | 21       | 7   | no         | HRD             | MH       | MH        |              | SR                     | yes         | no*              | Y                 | 19   |     |
| 36         |           | 1.50        | 1.12        |             |             | -0.38                  | 36       | -   | no         | HRD             | L        | N         |              | SR                     | no          | no               | Y                 | 48   |     |
| 67         | 1.2       | 0.8         |             |             |             | -0.42                  | 18       | 19  | no         | HRD             | N        | L         |              | SR                     | yes         | no               | n                 | >32  |     |
| 44         | 2.3       | 1.8         |             |             |             | -0.48                  | 45       | 5   | no         | t(11;14)        | VH       | N         |              | SR                     | no*         | no*              | n                 | 22   |     |
| 57         | 2.2       | 1.7         |             |             |             | -0.53                  | 27       | 26  | yes        | t(12;14)        | N        | VH        |              | SR                     | no          | no               | n                 | >36  |     |
| 62         | 2.1       | 1.5         |             |             |             | -0.56                  | 27       | 21  | no         | t(4;14)         | L        | VH        | HR (t(4;14)) | HR                     | no*         | no               | Y                 | 6    |     |
| 41         | 1.6       | 1.1         |             |             |             | -0.57                  | 36       | 18  | no         | t(4;14)         | L        | L         | HR (t(4;14)) | HR                     | no*         | no               | Y                 | 29   |     |
| 56         | 2.5       | 1.1         |             |             |             | -1.33                  | 15       | 15  | yes        | t(11;14)        | VH       | N         |              | SR                     | yes         | no               | n                 | >36  |     |
| 64         | 3.6       | 1.7         |             |             |             | -1.95                  | 3        | 3   | yes        | t(4;14)         | N        | MH        | HR (t(4;14)) | HR                     | yes         | yes              | Y                 | 10   |     |

<sup>§</sup> change in PI (Proliferative Index; see methods) from first to last sample. Bold=change >0.4.

<sup>§</sup> Cytogenetic risk, High Risk (HR); t(4;14), t(14;16) or del17p detected by FISH (in-house cohort) or canonical translocation from long insert WGS (CoMMpass)

Ig-T/HRD: Cytogenetic subgroup, includes t(11;14)/CCND1, t(12;14)/CCND1, t(6;14)/CCND3, t(4;14)/WHSC1(NSD2/MMSET), t(8;14)/MAFA (see Supplementary Table 12).

Risk status: HR: R-ISS 3 (or if not available, ISS 3), SR: Not HR

PFS: Time to first progression (from diagnosis). Only included for diagnosis-progression patients.

TTD = Time To Death or Time To Last Control (if still alive) from last sample.

TBS: Time between samples (months). If more than 2 samples, "/" are used to separate samples pairs, i.e S1-S2/S2-S3

CCND1/2 exp: Expression of CCND1/2 at diagnosis. N: No expression (TPM<2), L: Low (TPM 2-20), MH: Medium high (TPM 20-100), VH: Very high (TPM>100).

Relapse < 2y; yes: relapse within 24 months from diagnosis, if not: no. For patients with many relapses, first sample are used for this definition. \*Patient has progressed within 24 months but no BM sample available for that time

Relapse < 1y; yes: relapse within 12 months from diagnosis, if not: no. For patients with many relapses, first sample are used for this definition. \*Patient has progressed within 12 months but no BM sample available for that time
