# Supplementary material for: Clonal evolution after treatment pressure in multiple myeloma: heterogenous genomic aberrations and transcriptomic convergence
Source: PubMed Central journal article supplement (PMC9252918; doi:10.1038/s41375-022-01597-y), 2022-05-28
Supplement: 41375_2022_1597_MOESM16_ESM.pdf [file 41375_2022_1597_MOESM16_ESM.pdf]

**Table S10.** Table showing the Proliferative Index for the earliest and latest sample, and evolution patterns.

| Patient ID | Ig-T/HRD | PI Sample 1 | PI latest S* | PI Change <sup>#</sup> | Evolution pattern <sup>§</sup> | Clonal change | Dead | TTD |
|------------|----------|-------------|--------------|------------------------|--------------------------------|---------------|------|-----|
| 52         | HRD      | 1.4         | 4.4          | 3.06                   | Differential                   | Y             | n    | >27 |
| 65         | HRD      | 1.0         | 3.9          | 2.93                   | Differential                   | Y             | y    | 0   |
| 63         | t(8;14)  | 1.9         | 4.7          | 2.79                   | Differential                   | Y             | y    | 3   |
| 60         | HRD      | 1.5         | 4.2          | 2.65                   | Differential                   | Y             | y    | 0   |
| 28         | HRD      | 1.9         | 4.5          | 2.61                   | Differential                   | Y             | y    | 19  |
| 27         | t(4;14)  | 1.5         | 4.0          | 2.50                   | Linear                         | Y             | y    | 1   |
| 46         | unknown  | 1.9         | 4.3          | 2.47                   | Differential                   | Y             | y    | 3   |
| 20         | t(11;14) | 1.9         | 4.2          | 2.32                   | Differential                   | Y             | y    | 2   |
| 51         | HRD      | 1.1         | 3.2          | 2.09                   | Differential                   | Y             | y    | 1   |
| 31         | t(4;14)  | 1.1         | 3.1          | 2.05                   | Differential                   | Y             | y    | 1   |
| 49         | HRD      | 1.6         | 3.6          | 2.00                   | Differential                   | Y             | y    | 0   |
| 54         | t(6;14)  | 1.8         | 3.4          | 1.53                   | Differential                   | Y             | n    | >13 |
| 53         | HRD      | 0.6         | 2.1          | 1.52                   | Differential                   | Y             | n    | >25 |
| 55         | HRD      | 0.8         | 2.3          | 1.48                   | Differential                   | Y             | n    | >41 |
| 50         | t(11;14) | 1.5         | 2.9          | 1.45                   | Differential                   | Y             | n    | >29 |
| 58         | HRD      | 2.5         | 3.9          | 1.41                   | Differential                   | Y             | y    | 4   |
| 18         | HRD      | 2.3         | 3.7          | 1.35                   | Differential                   | Y             | y    | 0   |
| 10         | t(4;14)  | 1.8         | 3.0          | 1.21                   | Stable                         | N             | y    | 19  |
| 24         | t(11;14) | 0.3         | 1.4          | 1.07                   | Differential                   | Y             | y    | 10  |
| 15         | HRD      | 1.4         | 2.3          | 0.90                   | Differential                   | Y             | y    | 46  |
| 26         | HRD      | 2.5         | 3.3          | 0.78                   | Differential                   | Y             | y    | 1   |
| 34         | HRD      | 2.5         | 3.3          | 0.75                   | Differential                   | Y             | y    | 2   |
| 32         | HRD      | 0.2         | 0.9          | 0.69                   | Differential                   | Y             | y    | 1   |
| 42         | HRD      | 1.3         | 1.9          | 0.65                   | Differential                   | Y             | y    | 38  |
| 23         | HRD      | 0.5         | 1.1          | 0.52                   | Differential                   | Y             | y    | 14  |
| 8          | t(11;14) | 1.3         | 1.8          | 0.49                   | Linear                         | N             | y    | 4   |
| 25         | HRD      | 0.3         | 0.8          | 0.49                   | Differential*                  | N             | y    | 27  |
| 47         | t(4;14)  | 1.8         | 2.2          | 0.42                   | Differential                   | N             | y    | 31  |
| 61         | t(11;14) | 2.9         | 3.2          | 0.34                   | Linear                         | Y             | y    | 21  |
| 59         | t(4;14)  | 1.0         | 1.3          | 0.31                   | Stable                         | N             | n    | >43 |
| 4          | t(11;14) | 1.7         | 1.9          | 0.28                   | Differential                   | Y             | y    | 6   |
| 9          | t(11;14) | 1.0         | 1.2          | 0.25                   | Linear                         | Y             | n    | >46 |
| 43         | t(4;14)  | 1.1         | 1.3          | 0.24                   | Differential                   | Y             | y    | 21  |
| 48         | HRD      | 1.7         | 1.8          | 0.18                   | Differential                   | Y             | y    | 5   |
| 30         | HRD      | 0.5         | 0.6          | 0.15                   | Stable                         | N             | n    | >47 |
| 45         | t(11;14) | 1.3         | 1.4          | 0.10                   | Stable                         | N             | n    | >7  |
| 29         | HRD      | 0.5         | 0.5          | -0.01                  | Stable                         | N             | y    | 20  |
| 33         | t(11;14) | 0.9         | 0.9          | -0.06                  | Differential                   | Y             | y    | 22  |
| 35         | HRD      | 1.0         | 0.9          | -0.07                  | Differential                   | Y             | y    | 26  |
| 40         | t(11;14) | 1.7         | 1.7          | -0.07                  | Linear                         | Y             | n    | >18 |
| 66         | HRD      | 2.2         | 1.9          | -0.29                  | Stable                         | N             | y    | 19  |
| 36         | HRD      | 1.5         | 1.1          | -0.38                  | Linear                         | Y             | y    | 48  |
| 67         | HRD      | 1.2         | 0.8          | -0.42                  | Stable                         | Y             | n    | >32 |
| 44         | t(11;14) | 2.3         | 1.8          | -0.48                  | Linear                         | N             | n    | 22  |
| 57         | t(12;14) | 2.2         | 1.7          | -0.53                  | Linear                         | Y             | n    | >36 |
| 41         | t(4;14)  | 1.6         | 1.1          | -0.57                  | Differential                   | Y             | y    | 29  |
| 62         | t(4;14)  | 2.1         | 1.5          | -0.59                  | Linear                         | Y             | y    | 6   |
| 56         | t(11;14) | 2.5         | 1.1          | -1.33                  | Stable                         | N             | n    | >36 |
| 64         | t(4;14)  | 3.6         | 1.7          | -1.95                  | Differential                   | Y             | y    | 10  |

PI: Proliferative index, measured using a gene expression signature (Zhan et al., Blood, 2006).

\*Latest available progression sample

<sup>#</sup> change in PI (Proliferative Index; see methods) from first to last sample. Bold=change >0.4

<sup>§</sup>If many samples for each patient, the evolution pattern showing the most change is shown (differential>linear>stable). \*Linear evolution at the tp where transcription increase occur, see table S5.

Cytogenetic subgroup (Supplementary Table 12)

Differential = differential clonal response

Linear = linear evolution

Stable = stable evolution

TTD = Time to death or to last control (patients still alive) from latest sample. Bold: Patients with a end-stage disease sample (<12 months from death)
