# Supplementary material for: Clonal evolution after treatment pressure in multiple myeloma: heterogenous genomic aberrations and transcriptomic convergence
Source: PubMed Central journal article supplement (PMC9252918; doi:10.1038/s41375-022-01597-y), 2022-05-28
Supplement: 41375_2022_1597_MOESM17_ESM.pdf [file 41375_2022_1597_MOESM17_ESM.pdf]

**Table S11.** Mutations in ABCB transporters, nuclear exportins, relevant treatment targets including CD38, BCL2 and SLAMF7 (Figure 5), CGA genes and inhibitory and stimulatory receptors (Figure 6A). RNA expression are shown for samples with genomic mutation present, when available. NA: no data, CCF: Cancer Cell Fraction

| Patient_ID | Gene   | Gene Class       | Chr   | ExonicFunc.refGene | S1 CCF     | RNA depth* | RNA alt freq | S2 CCF    | RNA depth | RNA alt freq | S3 CCF    | RNA depth | RNA alt freq | S4 CCF | RNA depth | RNA alt freq | S4 |
|------------|--------|------------------|-------|--------------------|------------|------------|--------------|-----------|-----------|--------------|-----------|-----------|--------------|--------|-----------|--------------|----|
| 36         | XPO4   | Nuclear exportin | chr13 | nonsynonymous SNV  | 0.0123101  | 8          | 0.559        | 0.409194  | 4         | 0            |           |           |              |        |           |              |    |
| 34         | ABCA1  | ABC transporter  | chr9  | nonsynonymous SNV  | 0.749639   | 5          | 0.6          | 0         | 15        | 0            | 0         | 15        | 0            | 0      | 0         |              |    |
| 34         | ABCA5  | ABC transporter  | chr17 | nonsynonymous SNV  | 0          |            |              | 0         |           |              | 0.26834   | 0         | 0            | 0      | 0         |              |    |
| 34         | ABCG1  | ABC transporter  | chr21 | nonsynonymous SNV  | 0          |            |              | 0         |           |              | 0.252859  | 7         | 0            | 0      | 0         |              |    |
| 35         | ABCA1  | ABC transporter  | chr9  | nonsynonymous SNV  | 0          |            |              | 0.523729  | 0         | 0            |           |           |              |        |           |              |    |
| 35         | ABCC1  | ABC transporter  | chr16 | nonsynonymous SNV  | 1.08084    | 3          | 0.091        | 0.908798  | 0         | 0            |           |           |              |        |           |              |    |
| 4          | CD38   | Drug target      | chr4  | nonsynonymous SNV  | 0          | 266        | 0            | 0.881623  | 1370      | 0.416        |           |           |              |        |           |              |    |
| 5          | CFTR   | ABC transporter  | chr7  | nonsynonymous SNV  | 0.0275494  | NA         | NA           | 0.841492  | NA        | NA           |           |           |              |        |           |              |    |
| 9          | ABCC9  | ABC transporter  | chr12 | nonsynonymous SNV  | 1.02923    | 0          | 0            | 0.772415  | 1         | 0            |           |           |              |        |           |              |    |
| 9          | ABCF3  | ABC transporter  | chr3  | nonsynonymous SNV  | 0.0524541  | 23         | 0            | 0.648549  | 16        | 0            |           |           |              |        |           |              |    |
| 24         | ABCG1  | ABC transporter  | chr21 | nonsynonymous SNV  | 0          |            |              | 0.448335  | 3         | 0            |           |           |              |        |           |              |    |
| 24         | CSE1L  | ABC transporter  | chr20 | nonsynonymous SNV  | 0.0580441  | 8          | 0            | 0.787664  | 20        | 0.443        |           |           |              |        |           |              |    |
| 26         | CFTR   | ABC transporter  | chr7  | nonsynonymous SNV  | 1.27114    | 0          | 0            | 1.08694   | 0         | 0            | 1.08656   | 0         | 0            | 0      |           |              |    |
| 27         | ABCA2  | ABC transporter  | chr9  | nonsynonymous SNV  | 0.202985   | 1          | 0            | 0         |           |              | 0         |           |              |        |           |              |    |
| 28         | ABCA1  | ABC transporter  | chr9  | nonsynonymous SNV  | 0.00822707 | 2          | 0            | 0.81095   | 0         | 0            |           |           |              |        |           |              |    |
| 28         | XPO1   | Nuclear exportin | chr2  | nonsynonymous SNV  | 0.300398   | 67         | 0.102        | 0         | 0         | 0            |           |           |              |        |           |              |    |
| 31         | ABCC9  | ABC transporter  | chr12 | nonsynonymous SNV  | 1.24884    | 0          | 0            | 0.921358  | 1         | 1            | 0.946819  | 1         | 0            | 0      |           |              |    |
| 31         | ABCC9  | ABC transporter  | chr12 | nonsynonymous SNV  | 1.13506    | 0          | 0            | 0.954433  | 1         | 1            | 1.14146   | 0         | 0            | 0      |           |              |    |
| 31         | ABCG2  | ABC transporter  | chr4  | nonsynonymous SNV  | 0          |            |              | 0.132193  | 0         | 0            | 0         | 2         | 0            | 0      |           |              |    |
| 41         | ABCG2  | ABC transporter  | chr4  | stopgain           | 0.36134    | 0          | 0            | 0         |           |              |           |           |              |        |           |              |    |
| 43         | ABCA5  | ABC transporter  | chr17 | nonsynonymous SNV  | 1.21217    | 22         | 0.32         | 0.809013  | 0         | 0            | 1.09972   | 22        | 0.5          | 0      |           |              |    |
| 43         | ABCC9  | ABC transporter  | chr12 | nonsynonymous SNV  | 1.05707    | 0          | 0            | 0.895412  | 0         | 0            | 0.940018  | 0         | 0            | 0      |           |              |    |
| 47         | ABCG1  | ABC transporter  | chr21 | nonsynonymous SNV  | 0.892131   | NA         | NA           | 0.924271  | NA        | NA           |           |           |              |        |           |              |    |
| 53         | ABCB8  | ABC transporter  | chr7  | nonsynonymous SNV  | 0.885919   | 109        | 0.34         | 0.917726  | 125       | 0.3          |           |           |              |        |           |              |    |
| 57         | ABCA1  | ABC transporter  | chr9  | nonsynonymous SNV  | 1.05424    | 49         | 0.47         | 1.02484   | 30        | 0.47         |           |           |              |        |           |              |    |
| 57         | ABCG2  | ABC transporter  | chr4  | nonsynonymous SNV  | 1.01725    | 126        | 0.52         | 1.07101   | 117       | 0.46         |           |           |              |        |           |              |    |
| 58         | XPO1   | Nuclear exportin | chr12 | nonsynonymous SNV  | 0.735421   | 315        | 0.37         | 0.583223  | NA        | NA           | 1.04349   | 787       | 0.55         |        |           |              |    |
| 61         | MCL1   | Drug target      | chr1  | nonsynonymous SNV  | 0.829188   | 1039       | 0.26         | 0.904074  | 2482      | 0.29         |           |           |              |        |           |              |    |
| 61         | XPO6   | Nuclear exportin | chr16 | stopgain           | 0.665247   | 23         | 0.09         | 1.19122   | 503       | 0.14         |           |           |              |        |           |              |    |
| 58         | MORC1  | CGA              | chr3  | nonsynonymous SNV  | 0          |            |              | 0         |           |              | 0.277968  | 0         | 0            |        |           |              |    |
| 61         | MORC1  | CGA              | chr3  | nonsynonymous SNV  | 0.842231   | 0          | 0            | 0.994493  | 13        | 0.38         |           |           |              |        |           |              |    |
| 44         | WDR64  | CGA              | chr1  | nonsynonymous SNV  | 0          |            |              | 0.459131  | 57        | 0.18         |           |           |              |        |           |              |    |
| 28         | CD274  | Inhibitory       | chr9  | nonsynonymous SNV  | 1.03467    | 14         | 0.5          | 0.994641  | 52        | 0.71         |           |           |              |        |           |              |    |
| 36         | CTCF   | CGA              | chr20 | nonsynonymous SNV  | 0.085256   | 0          | 0            | 0         |           |              |           |           |              |        |           |              |    |
| 10         | MORC1  | CGA              | chr3  | nonsynonymous SNV  | 0.170751   | 0          | 0            | 0.0192873 | 0         | 0            | 0.0474536 | 0         | 0            |        |           |              |    |
| 9          | TNFSF9 | Stimulatory      | chr19 | nonsynonymous SNV  | 1.07927    | 0          | 0            | 1.22824   | 4         | 0            |           |           |              |        |           |              |    |
| 36         | TNFSF9 | Stimulatory      | chr19 | nonsynonymous SNV  | 0.226112   | 1          | 0            | 0.091955  | 0         | 0            |           |           |              |        |           |              |    |
| 39         | WDR64  | CGA              | chr1  | nonsynonymous SNV  | 0          |            |              | 1.19068   | NA        | NA           |           |           |              |        |           |              |    |

\*For estimates of RNA depth and RNA alt frequency; for in-house cohort; see methods. For CoMMpass samples, data were from the file "MMRF\_CoMMpass\_IA13a\_IGV\_All\_Canonical\_Variants.mut".
