# Supplementary material for: Clonal evolution after treatment pressure in multiple myeloma: heterogenous genomic aberrations and transcriptomic convergence
Source: PubMed Central journal article supplement (PMC9252918; doi:10.1038/s41375-022-01597-y), 2022-05-28
Supplement: 41375_2022_1597_MOESM18_ESM.pdf [file 41375_2022_1597_MOESM18_ESM.pdf]

**Table S12.** Comparison of Translocation subgroup with detected primary translocations from a) FISH data for own-institutional samples, and b) long-insert WGS for CoMMpass samples. Nd: not detected. NA: no data

| A)         |             |          |           |          |                                                 | B)         |         |             |               |          |
|------------|-------------|----------|-----------|----------|-------------------------------------------------|------------|---------|-------------|---------------|----------|
| Patient_ID | RNAseq-Ig-T | Exome CN | FISH data | Ig-T/HRD | Comment                                         | Patient_ID | FISHseq | RNAseq-Ig-T | Exome-FISH_CN | Ig-T/HRD |
| 3          | NA          | NA       | del17     | NA       |                                                 | 40         | CCND1   | CCND1       | nd            | t(11;14) |
| 4          | CCND1       | nd       | t(11;14)  | t(11;14) |                                                 | 41         | WHSC1   | WHSC1       | nd            | t(4;14)  |
| 5          | NA          | NA       | nd        | NA       |                                                 | 42         | nd      | nd          | HRD           | HRD      |
| 7          | NA          | NA       | nd        | NA       |                                                 | 43         | WHSC1   | WHSC1       | nd            | t(4;14)  |
| 8          | CCND1       | nd       | nd        | t(11;14) |                                                 | 44         | CCND1   | CCND1       | nd            | t(11;14) |
| 9          | CCND1       | nd       | nd*       | t(11;14) | * = FISH: tested for t(4;14) only.              | 45         | CCND1   | CCND1       | nd            | t(11;14) |
| 10         | WHSC1       | nd       | t(4;14)   | t(4;14)  |                                                 | 46         | NA      | NA          | unknown       | NA       |
| 13         | NA          | NA       | nd        | NA       |                                                 | 47         | WHSC1   | WHSC1       | nd            | t(4;14)  |
| 14         | NA          | NA       | nd        | NA       |                                                 | 48         | nd      | nd          | HRD           | HRD      |
| 15         | nd          | HRD      | t(4;14)   | HRD      | RNAseq: No expression of WHSC1 or FGFR3 (TPM<3) | 49         | nd      | nd          | HRD           | HRD      |
| 17         | CCND1       | nd       | nd        | t(11;14) |                                                 | 50         | CCND1   | CCND1       | nd            | t(11;14) |
| 18         | nd          | HRD      | nd        | HRD      |                                                 | 51         | nd      | nd          | HRD           | HRD      |
| 19         | NA          | NA       | nd        | NA       |                                                 | 52         | nd      | nd          | HRD           | HRD      |
| 20         | CCND1       | nd       | t(11;14)  | t(11;14) |                                                 | 53         | nd      | nd          | HRD           | HRD      |
| 23         | nd          | HRD      | nd        | HRD      |                                                 | 54         | CCND3   | CCND3       | nd            | t(6;14)  |
| 24         | CCND1       | nd       | t(11;14)  | t(11;14) |                                                 | 55         | nd      | nd          | HRD           | HRD      |
| 25         | nd          | HRD      | nd        | HRD      |                                                 | 56         | CCND1   | CCND1       | HRD           | t(11;14) |
| 26         | nd          | HRD      | nd        | HRD      |                                                 | 57         | CCND2   | CCND2       | nd            | t(12;14) |
| 27         | WHSC1       | nd       | t(4;14)   | t(4;14)  |                                                 | 58         | nd      | nd          | HRD           | HRD      |
| 28         | nd          | HRD      | nd        | HRD      |                                                 | 59         | WHSC1   | WHSC1       | nd            | t(4;14)  |
| 29         | nd          | HRD      | nd        | HRD      |                                                 | 60         | MAFB    | nd          | HRD           | HRD      |
| 30         | nd          | HRD      | nd        | HRD      |                                                 | 61         | CCND1   | CCND1       | nd            | t(11;14) |
| 31         | WHSC1       | nd       | t(4;14)   | t(4;14)  |                                                 | 62         | WHSC1   | WHSC1       | HRD           | t(4;14)  |
| 32         | nd          | HRD      | nd        | HRD      |                                                 | 63         | MAFA    | MAFA        | nd            | t(8;14)  |
| 33         | CCND1       | nd       | t(11;14)  | t(11;14) |                                                 | 64         | WHSC1   | WHSC1       | nd            | t(4;14)  |
| 34         | nd          | HRD      | nd        | HRD      |                                                 | 65         | nd      | nd          | HRD           | HRD      |
| 35         | nd          | HRD      | nd        | HRD      |                                                 | 66         | nd      | nd          | HRD           | HRD      |
| 36         | nd          | HRD      | nd        | HRD      |                                                 | 67         | nd      | nd          | HRD           | HRD      |
| 39         | NA          | NA       | t(4;14)   | t(4;14)  |                                                 |            |         |             |               |          |

RNAseq-Ig-T: Estimates of Canonical Translocations by expression on RNAseq

Ig-T/HRD: cytogenetic subgroup, based on RNAseq-Ig-T data and CNV data (from WES) (HRD).

FISHseq: Canonical Translocations identified by long-insert WGS.

RNAseq-Ig-T: Estimates of Canonical Translocations by expression on RNAseq

Ig-T/HRD: cytogenetic subgroup

If both a HRD Call and a canonical translocation found, translocation is chosen for the cytogenetic group.
