# Supplementary material for: Clonal evolution after treatment pressure in multiple myeloma: heterogenous genomic aberrations and transcriptomic convergence
Source: Leukemia. 2022 May 28;36(7):1887–97. doi: 10.1038/s41375-022-01597-y (PMC9252918; doi:10.1038/s41375-022-01597-y)
Supplement: Supplementary file 15 — Table S9 [file 41375_2022_1597_MOESM15_ESM.pdf]

**Table S9.** Overview ssGSEA pathway data of selected Hallmark genesets. Includes also measured NFkB index (NKbI) and gene expression levels for MYC (TPM). S1: Early sample, LS: Latest sample. ESD: End stage disease.

[illegible]
